# Supplementary material
Source: publisher site journal article supplement (https://www.spandidos-publications.com/4412/downloadSupplementary)
Supplement: Supplementary file 1 [file downloadSupplementary]

## Sheet: Sheet1
Table SII. List of candidate genes enriched and associated with various anticancer or cancer-related drugs.
Drugs	P-value	Odds ratio	Combined score	Genes
Gadolinium Trichloride CTD 00001814	0.001	98.46	3317.68	RB1, IL6, TGFB1, IFNG, IL13, MAPK1, VEGFA, MAPK3
Surfactin CTD 00000478	0.001	96	3598.41	IL6, IL1B, CASP3, BCL2, HMOX1, BAX, MAPK1, TNF, MAPK3
Oroxylin A CTD 00002952	0.001	96	3598.41	PARP1, MMP2, CASP3, BCL2, TIMP2, MAPK1, FOS, MMP9, MAPK3
Diosgenin Ctd 00005850	0.001	96	3598.41	CCND1, MYC, BCL2, AKT1, PTGS2, TNF, MMP9, NFKB1, VEGFA
Curcumin II CTD 00002181	0.001	94.12	3885.27	PLAU, WT1, MMP2, CASP3, KDR, TIMP2, HMOX1, PPARG, MMP9, VEGFA
Trametinib CTD 00005130	0.001	93.33	2711.14	RB1, JUN, MYC, CASP3, AKT1, MAPK1, MAPK3
Nvp-Aew541 Ctd 00004462	0.001	90	3299.58	CDKN1A, CCND1, CDK4, BCL2, AKT1, BAX, MAPK1, EGFR, MAPK3
Eugenol CTD 00005949	0.001	9.94	163.84	RB1, IL1B, BCL2, HMOX1, CXCR4, PPARG, PTGS2, TNF, NFKB1, ESR2
Menadione PC3 UP	0.001	9.91	117.62	JUN, CDKN1A, DUSP1, SNAI1, HMOX1, CXCR4, FOS
Carbamazepine CTD 00005574	0.001	9.91	428.86	RB1, CEBPB, PTEN, TNF, NRAS, MAPK8, CCND1, CASP10, MYC, ERBB2, AKT1, HRAS, JUN, PARP1, DUSP1, STAT3, FANCC, FOS, MAPK14, NFKB1, VEGFA, IL6, PIK3CA, FAS, CTNNB1, PPARG, KRAS
Liothyronine CTD 00006943	0.001	9.88	162.25	CDKN1A, CCND1, CASP3, BCL2, BAX, AKT1, MAPK1, PPARG, TRAF1, MAPK3
Ellipticine PC3 UP	0.001	9.88	86.69	IL6, DUSP1, SNAI1, CXCR4, FOS
15-Delta Prostaglandin J2 PC3 UP	0.001	9.85	71.07	CDKN1A, JUN, DUSP1, HMOX1
Manganese Chloride Ctd 00001187	0.001	9.8	190.05	IL6, MAPK8, WT1, CASP3, CTNNB1, MAPK1, ATM, MAPK14, PTGS2, CXCL14, VEGFA, MAPK3
Go 6976 RBC	0.001	9.8	55.23	ALK, RET, PRKCB
Nilotinib	0.001	9.7	69.43	RET, MAPK11, MAPK8, MAPK14
Syrosingopine PC3 UP	0.001	9.7	69.43	IL6, DUSP1, HMOX1, PTGS2
Rofecoxib CTD 00003631	0.001	9.7	99	IL6, IL1B, STAT3, NOS1, PTGS2, TNF
Fentanyl BOSS	0.02	9.7	38.94	IL6, TNF
Dl-Isoleucine Boss	0.02	9.7	38.94	PRDX2, MTOR
Triton X-100 BOSS	0.02	9.7	38.94	PRDX2, ERBB2
N-Oleoyldopamine Ctd 00004334	0.02	9.7	38.94	MTOR, CFTR
Glycerol BOSS	0.001	9.62	170.07	PRDX2, IL6, CASP3, ERBB2, BCL2, HMOX1, PPARG, TNF, MMP9, VEGFA, MAPK3
(+)-Chelidonine HL60 DOWN	0.001	9.6	53.57	WT1, MYC, TNF
Fluconazole BOSS	0.001	9.6	53.57	PRDX2, IFNG, TNF
Vandetanib	0.001	9.57	111.4	ALK, RET, ERBB2, KDR, MAPK14, EGFR, MTOR
Clopidogrel Bisulfate BOSS	0.001	9.55	67.85	IL6, ACE, ATM, TNF
635-65-4 Ctd 00005510	0.001	9.54	139.25	IL6, CCND1, IL1B, CPD, PTEN, AKT1, HMOX1, MAPK1, MAPK3
1,2,4-Benzenetriol Ctd 00000682	0.001	9.5	95.96	JUN, IL6, HMOX1, HES1, TNF, RAB22A
3,3',4,4',5-Pentachlorobiphenyl Ctd 00001077	0.001	9.45	207.89	CDKN1A, PARP1, NOS2, NOS3, PTGS2, MMP9, IL1B, CASP3, BCL2, BAX, AKT1, HMOX1, MAPK1, MAPK3
Deptropine PC3 UP	0.001	9.41	66.33	CDKN1A, CEBPB, IL6, FGF2
Hg-9-91-01 Lincs	0.001	9.41	136.38	ALK, RET, MAPK11, MAPK8, CDK4, ERBB2, KDR, MAPK14, EGFR
Meiqx CTD 00001739	0.001	9.41	122.43	CEBPB, CDKN1A, CASP3, BCL2, BAX, HMOX1, FOS, PTGS2
Zoledronic Acid CTD 00003127	0.001	9.41	365.24	CDKN1A, PTGS2, TNF, FGF2, MAPK8, CCND1, PLAU, CASP3, CASP1, AKT1, MAPK1, HRAS, MAPK3, PARP1, MMP2, RHOA, IL2, VEGFA, IL6, MSH2, IFNG, CPD, BCL2, FAS, BAX
Palmatine CTD 00000225	0.1	9.41	21.56	VEGFA
At 877 Ctd 00002152	0.1	9.41	21.56	CFTR
Diethylcarbamodithioic Acid CTD 00005815	0.1	9.41	21.56	CASP3
Edta Ctd 00005888	0.1	9.41	21.56	IL6
Flunitrazepam CTD 00005980	0.1	9.41	21.56	CASP3
Benzo[A]Pyrene-7,8-Dione CTD 00002864	0.1	9.41	21.56	HMOX1
Floxuridine TTD 00008052	0.1	9.41	21.56	NFKB1
2-(2-Pyridyl)Benzimidazole TTD 00000504	0.1	9.41	21.56	CASP3
Imatinib TTD 00008550	0.1	9.41	21.56	SMAD3
Neca Ttd 00009638	0.1	9.41	21.56	MAPK1
Chloropyramine PC3 UP	0.02	9.41	37.26	PLAU, PTGS2
Perphenazine MCF7 UP	0.02	9.41	37.26	HMOX1, VEGFA
Promethazine PC3 UP	0.02	9.41	37.26	CDKN1A, IL6
Diazepam CTD 00005789	0.02	9.41	37.26	FGF2, NFKB1
Perphenazine CTD 00006495	0.02	9.41	37.26	PRL, MTOR
1-(5-Deoxypentofuranosyl)-5-Fluoropyrimidine-2,4(1h,3h)-Dione CTD 00001171	0.001	9.41	51.99	IFNG, TNF, HRAS
Haloperidol CTD 00006071	0.001	9.41	51.99	IL1B, PRL, MTOR
Etoposide CTD 00005948	0.001	9.37	392.2	RB1, CDKN1A, PTEN, BRCA1, FGF2, EGFR, CCND1, PLAU, MYC, CASP3, ERBB2, AKT1, EP300, MAPK1, MAPK3, SMAD2, JUN, PARP1, FOS, MAPK12, ESR2, VEGFA, BCL2, FAS, BAX, CTNNB1, ATM
5109870 Mcf7 Up	0.001	9.36	148.95	CDKN1A, PLAU, DUSP1, FAS, HMOX1, CXCR4, FOS, EGFR, VEGFA, DDB2
Disulfiram MCF7 UP	0.001	9.28	64.86	JUN, DUSP1, HMOX1, VEGFA
L-Glutamic Acid BOSS	0.001	9.26	160.22	PRDX2, IL6, IL1B, CASP3, BCL2, HMOX1, TNF, MMP9, MTOR, VEGFA, MAPK3
Pararosaniline MCF7 UP	0.001	9.23	50.49	CEBPB, HMOX1, VEGFA
15-Delta Prostaglandin J2 MCF7 UP	0.001	9.18	104.31	JUN, CDKN1A, CEBPB, DUSP1, HMOX1, FAS, VEGFA
Mephentermine HL60 UP	0.001	9.14	63.44	CDKN1A, JUN, IL1B, PTGS2
Haloperidol	0.02	9.14	35.7	IL1B, MTOR
Levodopa	0.02	9.14	35.7	IL1B, EGFR
Paclitaxel	0.02	9.14	35.7	ERBB2, BRCA1
Erlotinib FDA	0.02	9.14	35.7	RET, EGFR
Ki-20227 Kinome Scan	0.02	9.14	35.7	RET, KDR
Erlotinib Kinome Scan	0.02	9.14	35.7	RET, EGFR
Ritodrine PC3 UP	0.02	9.14	35.7	DUSP1, PTGS2
Reserpine BOSS	0.02	9.14	35.7	PRDX2, CASP3
Clofazimine CTD 00005683	0.02	9.14	35.7	MITF, CFTR
Warfarin CTD 00005716	0.02	9.14	35.7	IL1B, PPARG
Leucovorin CTD 00005678	0.02	9.14	35.7	CDKN1A, CASP3
Fenbuconazole CTD 00004512	0.02	9.14	35.7	ESR2, MAPK3
Piceatannol TTD 00010229	0.02	9.14	35.7	CASP3, MITF
Indirubin Deriv. 7a Ttd 00008589	0.02	9.14	35.7	MAPK1, MTOR
Niclosamide MCF7 UP	0.001	9.11	102.98	CDKN1A, CEBPB, SMAD3, DUSP1, MYC, HMOX1, VEGFA
Gw-8510 Pc3 Up	0.001	9.09	76.25	JUN, IL6, DUSP1, FOS, PTGS2
Alprostadil PC3 UP	0.001	9.06	49.05	IL6, DUSP1, PTGS2
Mometasone HL60 UP	0.001	9.06	49.05	DUSP1, CPD, CXCR4
Pyrvinium PC3 UP	0.001	9.06	49.05	CDKN1A, CEBPB, DUSP1
Clotrimazole BOSS	0.001	9.06	49.05	JUN, MAPK1, PPARG
Ellipticine TTD 00007811	0.001	9.01	62.07	IL1B, MITF, PPARG, CFTR
Nvp-Bez235 Ctd 00004861	0.001	88	3897.84	RB1, CDKN1A, PARP1, PIK3CA, CCND1, CASP3, PTEN, AKT1, MAPK1, MTOR, MAPK3
(5-Methyl-3-(Morpholinomethyl)-2,3-Dihydro-[1,4]Oxazino[2,3,4-Hi]Indol-6-Yl)(Naphthalen-1-Yl)Methanone CTD 00002747	0.001	87.27	2134.9	MAPK8, AKT1, MAPK1, EGFR, MAPK3, VEGFA
Butein CTD 00001872	0.001	87.27	2134.9	AKT1, HMOX1, TNF, MMP9, NFKB1, VEGFA
Perifosine CTD 00003447	0.001	87.27	2134.9	MAPK8, CASP3, AKT1, BAX, MAPK1, MAPK3
Pimaric Acid Ctd 00000440	0.001	87.27	2134.9	JUN, MAPK1, FOS, TNF, MMP9, MAPK3
Tipifarnib CTD 00003753	0.001	87.27	2134.9	CCND1, CASP3, AKT1, MAPK1, HRAS, MAPK3
Wp1066 Ctd 00004704	0.001	87.27	2134.9	PARP1, CASP3, STAT3, AKT1, MAPK1, MAPK3
Chembl55802 Ctd 00003118	0.001	85.33	2738.87	TGFB1, MMP2, IL1B, AKT1, MAPK1, PTGS2, MMP9, MAPK3
Nitroglycerin CTD 00006039	0.001	83.2	4261.41	GUCY1B3, PARP1, NOS2, MMP2, TNF, MMP9, IL6, CASP10, CASP3, CASP1, HMOX1, FAS, CTNNB1
Bapta Ctd 00001204	0.001	80	1901.95	CREBBP, MAPK8, PARP1, CASP3, HMOX1, MMP9
Thymoquinone CTD 00000119	0.001	80	1901.95	CDKN1A, CCND1, IFNG, BCL2, HMOX1, BAX
Gamma-Tocopherol CTD 00007389	0.001	80	1901.95	CDKN1A, CCND1, CASP3, PPARG, PTGS2, TNF
Sodium Chromate Ctd 00001363	0.001	80	2207.35	CDKN1A, MYC, CASP3, BCL2, BAX, MAPK1, MAPK3
(2e,4e,6e,8e)-3,7-Dimethyl-9-(2,6,6-Trimethyl-3-Oxo-1-Cyclohexenyl)Nona-2,4,6,8-Tetraenoic Acid Ctd 00000070	0.001	8.97	87.67	IL1B, VEGFC, FAS, PTGS2, RHOA, EGFR
Methylbenzethonium Chloride PC3 UP	0.001	8.89	86.4	IL6, CDKN1A, CEBPB, DUSP1, HMOX1, PTGS2
Azacyclonol MCF7 UP	0.001	8.89	99.13	JUN, CEBPB, DUSP1, HMOX1, FOS, TNF, VEGFA
Isopentenyladenine CTD 00000045	0.11	8.89	19.89	JAG1
Muraglitazar CTD 00004445	0.11	8.89	19.89	PPARG
Phenothiazine Ctd 00001521	0.11	8.89	19.89	PPARG
Sevoflurane CTD 00000468	0.11	8.89	19.89	CASP3
Diltiazem CTD 00005836	0.11	8.89	19.89	NFKB1
3-Methoxycatechol Ctd 00002662	0.11	8.89	19.89	PPARG
Yohimbine CTD 00007005	0.11	8.89	19.89	PRL
Amoxapine CTD 00005389	0.11	8.89	19.89	PRL
Methysergide TTD 00009274	0.11	8.89	19.89	MYC
Retinol TTD 00010558	0.11	8.89	19.89	PPARG
Alitretinoin TTD 00001891	0.11	8.89	19.89	PPARG
Fucose TTD 00008125	0.11	8.89	19.89	PLAU
Olanzapine TTD 00009902	0.11	8.89	19.89	CFTR
Pyrimethamine TTD 00010423	0.11	8.89	19.89	NFKB1
Raloxifene Hydrochloride	0.02	8.89	34.23	PPARG, ESR2
Methyldopa BOSS	0.02	8.89	34.23	ACE, ESR2
Etacrynic Acid MCF7 UP	0.001	8.89	47.67	CDKN1A, HMOX1, FAS
Ethaverine HL60 DOWN	0.001	8.89	47.67	CDKN1A, JUN, PTGS2
Propofol MCF7 UP	0.001	8.89	47.67	JUN, DUSP1, FOS
3,3',4,4'-Tetrachlorobiphenyl Ctd 00001342	0.001	8.89	47.67	PARP1, CASP3, BAX
Chlorpromazine PC3 UP	0.001	8.89	60.74	CDKN1A, IL6, PTGS2, FGF2
Benzo[B]Fluoranthene CTD 00000306	0.001	8.77	59.45	PARP1, BCL2, PPARG, EGFR
Vandetanib Kinome Scan	0.001	8.73	46.36	RET, KDR, EGFR
Vandetanib FDA	0.001	8.73	46.36	RET, KDR, EGFR
Methoprene BOSS	0.001	8.73	46.36	PRDX2, CASP3, VEGFA
Copper(II) Chloride CTD 00001408	0.001	8.7	132.48	JUN, CDKN1A, PARP1, DUSP1, CASP3, HMOX1, ATM, FOS, TNF, VEGFA
Ast-487 Kinome Scan	0.001	8.65	107.04	RET, MAPK11, MAPK8, CDK4, KDR, MAPK14, MAPK12, EGFR
Ethinyl Estradiol	0.02	8.65	32.86	CASP1, ESR2
Stock1n-35696 Pc3 Up	0.02	8.65	32.86	BAX, PTGS2
Ivermectin MCF7 UP	0.02	8.65	32.86	CEBPB, VEGFA
Securinine PC3 DOWN	0.02	8.65	32.86	GUCY1A3, IL1B
Ibmx Boss	0.02	8.65	32.86	PPARG, TNF
Reserpine CTD 00006693	0.02	8.65	32.86	CCND1, MYC
Selenium Methyl Cysteine CTD 00000103	0.02	8.65	32.86	CCND1, BCL2
Ketoconazole CTD 00006190	0.001	8.65	58.21	MAPK8, CASP3, HMOX1, TNF
Nickel Sulfate Ctd 00001417	0.001	8.61	394.13	CDKN1A, PTEN, CXCR4, PTGS2, TNF, MAPK8, PLAU, MYC, CASP3, TIMP2, HMOX1, MAPK1, MAPK3, JUN, TGFB1, PARP1, DUSP1, IFNB1, MMP2, MITF, TRAF1, FOS, MMP9, NFKB1, VEGFA, IL6, IFNG, IL1B, SNAI1, BCL2, PPARG
Exel-2880/Gsk-1363089 Kinome Scan	0.001	8.59	105.9	ALK, RET, MAPK11, ERBB2, KDR, MAPK14, MAPK12, EGFR
Cyclophosphamide CTD 00005734	0.001	8.57	189.7	CEBPB, CDKN1A, PARP1, MAPK14, PTGS2, EGFR, ESR2, VEGFA, PLAU, CASP3, ERBB2, BCL2, CASP1, FAS, HMOX1
Pentachlorophenol CTD 00006479	0.01	8.57	45.09	CASP3, PPARG, FOS
Pyrvinium MCF7 UP	0.001	8.47	115.26	JUN, CEBPB, CDKN1A, PLAU, DUSP1, FAS, BAX, VEGFA, DDB2
Sodium Dichromate CTD 00000827	0.001	8.46	138.51	IL6, IFNG, PLAU, MYC, IL1B, BCL2, AKT1, HMOX1, TNF, MMP9, IL2
Eriodictyol Ctd 00000357	0.11	8.42	18.41	HMOX1
Finasteride CTD 00007232	0.11	8.42	18.41	IL1B
Tryptamine CTD 00001466	0.11	8.42	18.41	NFKB1
Chloroethylene CTD 00006592	0.11	8.42	18.41	KRAS
Albendazole TTD 00001871	0.11	8.42	18.41	PPARG
Caffeic Acid Phenethyl Ester TTD 00002641	0.11	8.42	18.41	MTOR
Raloxifene TTD 00010501	0.11	8.42	18.41	ESR2
Wortmannin TTD 00011856	0.11	8.42	18.41	IL1B
15-Delta Prostaglandin J2 MCF7 DOWN	0.02	8.42	31.58	RET, HES1
Clenbuterol HL60 UP	0.02	8.42	31.58	IL1B, PTGS2
4-Aminobenzohydrazide Ctd 00001642	0.02	8.42	31.58	JUN, HMOX1
Chembl332826 Ttd 00004878	0.02	8.42	31.58	MAPK1, BRCA1
Redoxal TTD 00010526	0.02	8.42	31.58	CASP3, MMP2
Miconazole	0.01	8.42	43.89	ERBB2, PTGS2, EGFR
Myricetin BOSS	0.001	8.42	55.84	PIK3CA, CASP3, TNF, MMP9
5224221 Mcf7 Up	0.001	8.33	66.52	CEBPB, JUN, DUSP1, HMOX1, VEGFA
Ellagic Acid TTD 00007809	0.001	8.31	54.72	SMAD3, IL1B, MAPK1, ESR2
Wh-4-023 Lincs	0.001	8.3	88.8	ALK, RET, MAPK11, CDK4, ERBB2, KDR, EGFR
Quinisocaine PC3 UP	0.01	8.28	42.73	CDKN1A, IL6, PTGS2
Fenson BOSS	0.01	8.28	42.73	IL6, CASP3, TNF
Medroxyprogesterone Acetate CTD 00006623	0.001	8.23	234.65	RET, CREBBP, CDKN1A, NOS3, MMP2, PRL, PTGS2, TNF, MMP9, IL2, VEGFA, IL6, CCND1, IFNG, PLAU, IL1B, KDR, FAS, BAX, CFTR
Irinotecan Hydrochloride CTD 00002224	0.001	8.21	340.27	RB1, CDKN1A, DLX4, TNF, FGF2, EGFR, CASP3, EP300, MAPK1, HES1, MAPK3, CREBBP, JUN, SMAD3, PRKCB, NUP153, TRAF1, FOS, MMP9, NFKB1, DDB2, IL6, MSH2, APC, IL1B, BCL2, FAS, BAX, ATM
Fendiline MCF7 UP	0.001	8.21	76.1	JUN, CEBPB, DUSP1, HMOX1, FOS, VEGFA
Suloctidil MCF7 UP	0.001	8.21	76.1	JUN, CEBPB, DUSP1, HMOX1, FOS, VEGFA
1-Nitropyrene Ctd 00001569	0.001	8.21	142.91	JUN, IL6, CEBPB, CDKN1A, CCND1, IL1B, BAX, BRCA1, FOS, PTN, TNF, NFKB1
Colchicine	0.02	8.21	30.37	CREBBP, BRCA1
Axitinib FDA	0.02	8.21	30.37	RET, KDR
Ag-013736 Kinome Scan	0.02	8.21	30.37	RET, KDR
Ethinyl Estradiol BOSS	0.02	8.21	30.37	CASP1, ESR2
Clofop [ISO] CTD 00000269	0.02	8.21	30.37	HMOX1, PPARG
Erythromycin CTD 00005916	0.02	8.21	30.37	HMOX1, CFTR
Fluspirilene TTD 00008080	0.02	8.21	30.37	SMAD3, PPARG
Ciclopirox HL60 UP	0.001	8.14	107.97	JUN, CDKN1A, DUSP1, IL1B, SNAI1, TRAF1, FOS, PTGS2, VEGFA
Flavopiridol Kinome Scan	0.01	8.14	41.61	ALK, CDK4, EGFR
Arsenenous Acid CTD 00000922	0.001	8.11	809.79	RB1, RET, GUCY1B2, CDKN1A, PTEN, BRCA1, TNF, CXCL14, FGF2, ETS1, CCND1, PLAU, CASP10, MYC, CASP3, AKT1, EP300, HRAS, PARP1, DUSP1, MMP2, IL13, TRAF1, FOS, MMP9, DDB2, DDB1, MSH2, PIK3CA, IFNG, IL1B, PPARG, CFTR, CEBPB, NOTCH1, CXCR4, PTGS2, EGFR, MAPK8, ERBB2, HMOX1, MAPK1, HES1, MAPK3, CREBBP, JUN, TGFB1, NOS3, STAT3, MAPK14, MAPK12, NFKB1, IL2, VEGFA, MAPK11, IL6, WT1, CDK4, SNAI1, BCL2, FAS, B…
Phosphine Boss	0.001	8.1	96.35	PRDX2, CASR, IL6, ACE, CASP3, PRL, TNF, MAPK3
Jnj-28312141 Kinome Scan	0.001	8	62.35	ALK, RET, MAPK8, KDR, EGFR
Azacitidine PC3 UP	0.001	8	73.07	JUN, IL6, CEBPB, DUSP1, HES1, PTGS2
Mitotane	0.12	8	17.1	ATM
Oxazepam	0.12	8	17.1	PPARG
Ab-1010 Kinome Scan	0.12	8	17.1	EGFR
Cp-690334-01 Pc3 Down	0.12	8	17.1	IL1B
Diflorasone PC3 UP	0.12	8	17.1	DUSP1
Monensin PC3 UP	0.12	8	17.1	HMOX1
Mycophenolic Acid MCF7 DOWN	0.12	8	17.1	MYC
Sulpiride BOSS	0.12	8	17.1	PRL
Congo Red BOSS	0.12	8	17.1	PRDX2
Apomorphine Hydrochloride BOSS	0.12	8	17.1	PRL
Streptomycine BOSS	0.12	8	17.1	IL6
Nicardipine BOSS	0.12	8	17.1	MTOR
1,3-Diphenylguanidine Ctd 00001305	0.12	8	17.1	SMAD3
Methylprednisolone CTD 00006322	0.12	8	17.1	CFTR
Clofibric Acid CTD 00005685	0.12	8	17.1	PPARG
1,2,9,10-Tetramethoxyaporphine CTD 00000187	0.12	8	17.1	CASP3
Felodipine CTD 00007084	0.12	8	17.1	NFKB1
5-Aminosalicylic Acid TTD 00001112	0.12	8	17.1	CASP1
Leflunomide TTD 00008927	0.12	8	17.1	CASP3
Thioridazine	0.03	8	29.23	PPARG, EGFR
Tacrine HL60 UP	0.03	8	29.23	CPD, MAPK14
Methyldopa CTD 00006311	0.03	8	29.23	PRL, ESR2
Sb 415286 Ctd 00003863	0.03	8	29.23	CCND1, FAS
Bandrowski's Base CTD 00002216	0.03	8	29.23	CXCR4, HMOX1
Dipyridamole TTD 00007632	0.03	8	29.23	ATM, BRCA1
Diethylstilbestrol	0.01	8	40.55	BRCA1, MAPK14, ESR2
Mometasone PC3 UP	0.01	8	40.55	CDKN1A, CEBPB, DUSP1
Zardaverine HL60 DOWN	0.01	8	40.55	WT1, MYC, BCL2
Chlorophyll A BOSS	0.01	8	40.55	DDB1, PRDX2, HMOX1
Albendazole CTD 00007095	0.01	8	40.55	PPARG, TNF, VEGFA
Hesperadin TTD 00008420	0.001	8	51.53	ALK, RET, MAPK8, KDR
Methoxycamptothecin CTD 00001213	0.001	75.79	2621.47	JUN, CDKN1A, CASP3, BCL2, FAS, BAX, FOS, PTGS2, TNF
Temsirolimus CTD 00003745	0.001	75.29	2317.35	RB1, CDKN1A, IL6, CCND1, CASP3, BCL2, MTOR, VEGFA
Homocastasterone CTD 00002741	0.001	74.67	2013.64	RB1, CDKN1A, CDK4, CASP3, BCL2, AKT1, ESR2
Melamine Ctd 00000625	0.001	74.67	2013.64	IL6, TGFB1, CASP3, BCL2, BAX, MAPK1, MAPK3
Titanium Ctd 00006899	0.001	74.67	2013.64	IL6, TGFB1, IFNG, MMP2, IL1B, TNF, MMP9
Herbimycin A CTD 00001010	0.001	73.85	1710.31	ACE, IFNG, HMOX1, MAPK1, TNF, VEGFA
Ginsenoside Rg3 Ctd 00003265	0.001	73.85	1710.31	SMAD2, TGFB1, PARP1, MMP2, CASP3, SNAI1
3,7,11-Trimethyldodeca-2,6,10-Trien-1-Yl Trihydrogen Diphosphate CTD 00000172	0.001	72.73	1407.35	IL1B, CASP3, FOS, HRAS, RHOA
Lead Dinitrate CTD 00000898	0.001	72.73	1407.35	MAPK1, FOS, PTGS2, EGFR, MAPK3
Diatrizoic Acid CTD 00005787	0.001	72.73	1407.35	MAPK8, CASP3, STAT3, BCL2, BAX
Benzoyl Peroxide Ctd 00005495	0.001	72.73	1407.35	JUN, IL6, PARP1, FOS, PTGS2
L-Mimosine CTD 00006335	0.001	72.73	1407.35	CDKN1A, CCND1, CASP3, BCL2, TNF
Chromium (Iii) Chloride Ctd 00001073	0.001	72.73	1407.35	IL6, CASP3, BCL2, BAX, TNF
Garcinol CTD 00002324	0.001	72.73	2749.31	IL6, PARP1, IL1B, CASP3, BCL2, EP300, AKT1, MAPK1, TNF, MAPK3
Ah 23848 Ctd 00002080	0.001	72.73	4096.86	JUN, PARP1, FOS, PTGS2, TNF, EGFR, NFKB1, MYC, CASP3, BCL2, AKT1, MAPK1, BAX, CTNNB1, MAPK3
Tiron Ctd 00006898	0.001	72.26	3793.36	CDKN1A, TGFB1, NOS3, MMP9, RHOA, NFKB1, IL6, CASP3, IL1B, BCL2, HMOX1, MAPK1, BAX, MAPK3
2,2',4,6,6'-Pentachlorobiphenyl CTD 00003860	0.001	72	2447.73	JUN, MAPK8, CASP3, AKT1, MAPK1, FOS, NFKB1, EGFR, MAPK3
Manumycin A CTD 00002318	0.001	72	2447.73	CDKN1A, PARP1, CCND1, IL1B, CASP3, STAT3, KRAS, TNF, HRAS
139890-68-9 Ctd 00002746	0.001	71.11	5293.74	JUN, PARP1, NOS3, PRKCB, FOS, MAPK14, TNF, MMP9, VEGFA, MAPK8, CASP3, IL1B, BCL2, AKT1, HMOX1, MAPK1, FAS, BAX, CFTR, MAPK3
Norcantharidin CTD 00002732	0.001	71.11	3189.49	CDKN1A, MAPK8, CASP3, STAT3, TIMP2, BCL2, MAPK1, FAS, BAX, IL2, MAPK3, VEGFA
Evodiamine CTD 00002158	0.001	71.11	3189.49	MAPK8, CCND1, PARP1, MYC, CASP3, IL1B, BCL2, AKT1, PTGS2, TNF, MMP9, NFKB1
Geranylgeranyl Pyrophosphate CTD 00000102	0.001	70.59	3935.65	CDKN1A, TGFB1, PARP1, TNF, MMP9, RHOA, VEGFA, IL6, CASP3, IL1B, BCL2, AKT1, MAPK1, HRAS, MAPK3
Naloxone CTD 00006373	0.001	70.4	2889.3	IL6, IL1B, BCL2, MAPK1, BAX, PRL, TNF, FGF2, IL2, MAPK3, DDB2
5-Hydroxy-1-(4-Hydroxy-3-Methoxyphenyl)Decan-3-One CTD 00000374	0.001	70.4	2889.3	RB1, CCND1, CDK4, CASP3, MMP2, BCL2, SNAI1, BAX, CTNNB1, PTGS2, MMP9
Brassinolide CTD 00001097	0.001	70	1847.87	RB1, CDKN1A, CCND1, CDK4, CASP3, BCL2, ESR2
Methaneseleninic Acid CTD 00000412	0.001	7.96	222.23	GUCY1A3, RB1, JUN, CDKN1A, TGFB1, PARP1, PRKCB, PTEN, VEGFC, MITF, FGF2, NFKB1, ESR2, MAPK8, CCND1, CDK4, MYC, AKT1, MAPK1, MAPK3
Staurosporine TTD 00011086	0.001	7.93	72.11	CASP3, STAT3, CASP1, MITF, NFKB1, EGFR
8-Azaguanine PC3 UP	0.001	7.93	177.48	JUN, CEBPB, CDKN1A, JAG1, DUSP1, TRAF1, FOS, PTGS2, EGFR, NFKB1, VEGFA, NRAS, IL6, CALD1, MYC, IL1B
K252a Mrc	0.001	7.92	61.37	MAPK8, AKT1, MAPK1, MAPK12, MAPK3
Ebselen CTD 00001949	0.001	7.9	50.53	TGFB1, CASP3, IL1B, FOS
Pentadecafluorooctanoic Acid CTD 00001078	0.001	7.88	112.93	IL6, IL1B, BCL2, CASP1, PTEN, CTNNB1, PPARG, PTGS2, TNF, MMP9
Nifedipine	0.01	7.87	39.52	MAPK1, BRCA1, NFKB1
Fluticasone HL60 UP	0.01	7.87	39.52	DUSP1, CPD, CXCR4
Tamoxifen MCF7 UP	0.01	7.87	39.52	JUN, DUSP1, FOS
Mefloquine MCF7 UP	0.001	7.83	80.93	JUN, CEBPB, DUSP1, HMOX1, HES1, FOS, VEGFA
Perhexiline MCF7 UP	0.001	7.8	70.23	JUN, DUSP1, HMOX1, HES1, FOS, VEGFA
Chlorogenic Acid Ctd 00005640	0.03	7.8	28.16	NOS3, PPARG
Dasatinib Kinome Scan	0.001	7.8	49.56	RET, MAPK11, MAPK14, EGFR
Dasatinib FDA	0.001	7.8	49.56	RET, MAPK11, MAPK14, EGFR
Azacitidine MCF7 UP	0.001	7.77	59.48	JUN, IL6, CEBPB, DUSP1, VEGFA
Ciclopirox MCF7 UP	0.001	7.77	59.48	CDKN1A, FAS, FOS, EGFR, VEGFA
Formic Acid BOSS	0.001	7.74	99.58	PRDX2, IL6, ACE, CASP3, BCL2, PPARG, TNF, MTOR, MAPK3
Toluene CTD 00006907	0.01	7.74	38.53	CXCR4, HMOX1, PTGS2
Palbociclib FDA	0.001	7.71	48.62	RET, MAPK8, PIK3CA, CDK4
Pd0332991 Lincs	0.001	7.71	48.62	RET, MAPK8, PIK3CA, CDK4
Sb 218078 Rbc	0.001	7.71	48.62	RET, PRKCB, CDK4, KDR
Staurosporine MRC	0.001	7.71	48.62	PRKCG, MAPK8, AKT1, MAPK12
Topotecan CTD 00007293	0.001	7.68	128.17	SFRP1, JUN, CASP3, BCL2, FAS, AKT1, CTNNB1, FOS, FGF2, EGFR, MTOR, VEGFA
Cgp74514a Lincs	0.001	7.68	68.42	ALK, RET, CDK4, MAPK1, EGFR, MAPK3
Tonzonium Bromide PC3 UP	0.001	7.67	78.24	JUN, IL6, CEBPB, CDKN1A, DUSP1, FOS, PTGS2
Dasatinib CTD 00004330	0.001	7.65	249.35	CDKN1A, SMAD3, JAG1, STAT3, BRCA1, MAPK14, TNF, EGFR, IL2, MTOR, IL6, MSH2, CCND1, IFNG, PLAU, CDK4, MYC, CASP3, BCL2, BAX, AKT1, MAPK1, PPARG, MAPK3
Niclosamide PC3 UP	0.001	7.62	87.19	IL6, CEBPB, CDKN1A, DUSP1, HMOX1, PTGS2, FGF2, EGFR
Acetaminophen	0.12	7.62	15.94	PTGS2
Albendazole	0.12	7.62	15.94	PPARG
Flumazenil	0.12	7.62	15.94	IL1B
Loperamide	0.12	7.62	15.94	MTOR
Propafenone	0.12	7.62	15.94	MTOR
Gw559768x Gsk	0.12	7.62	15.94	RET
Chembl1967116 Roche	0.12	7.62	15.94	KDR
Cloperastine MCF7 UP	0.12	7.62	15.94	FOS
Clotrimazole MCF7 UP	0.12	7.62	15.94	VEGFA
Securinine MCF7 UP	0.12	7.62	15.94	HMOX1
Urapidil PC3 UP	0.12	7.62	15.94	ATM
Vitamin MK 1 BOSS	0.12	7.62	15.94	PRDX2
Ryanodine BOSS	0.12	7.62	15.94	PRDX2
Miconazole Nitrate BOSS	0.12	7.62	15.94	PRDX2
3-Methylcholanthrene BOSS	0.12	7.62	15.94	MAPK3
Alpharedisol BOSS	0.12	7.62	15.94	TNF
Nitrofurantoin CTD 00006406	0.12	7.62	15.94	STAT3
Ethoxyquin CTD 00005936	0.12	7.62	15.94	PPARG
Ezetimibe CTD 00003509	0.12	7.62	15.94	PPARG
Phenolphthalein CTD 00007346	0.12	7.62	15.94	PPARG
Dihydrorotenone CTD 00002010	0.12	7.62	15.94	IL1B
Artemisinin CTD 00001499	0.12	7.62	15.94	NFKB1
Merbromin CTD 00006270	0.12	7.62	15.94	MAPK1
Tolfenamic Acid CTD 00000491	0.12	7.62	15.94	PPARG
Fisetin TTD 00008038	0.12	7.62	15.94	MAPK1
Daidzein TTD 00007423	0.12	7.62	15.94	ESR2
Tamoxifen TTD 00011319	0.12	7.62	15.94	ESR2
Liothyronine TTD 00008994	0.12	7.62	15.94	PPARG
Ethinyl Estradiol TTD 00007915	0.12	7.62	15.94	CASP1
Methyldopa	0.03	7.62	27.15	EGFR, ESR2
Purpurin Ctd 00003820	0.03	7.62	27.15	MAPK1, BRCA1
Benzbromarone TTD 00002342	0.03	7.62	27.15	PPARG, TNF
Wz4002 Lincs	0.01	7.62	37.59	ALK, ERBB2, EGFR
Dequalinium Chloride HL60 DOWN	0.01	7.62	37.59	CDKN1A, JUN, PTGS2
Zinc Acetate Dihydrate CTD 00007284	0.001	7.52	75.69	RB1, IL6, CDKN1A, CASP3, HMOX1, ATM, VEGFA
Thiostrepton MCF7 UP	0.01	7.5	36.67	CDKN1A, HMOX1, VEGFA
Spiperone PC3 UP	0.001	7.46	112.57	IL6, CEBPB, CDKN1A, JAG1, DUSP1, HMOX1, PTGS2, FGF2, ETS1, EGFR, VEGFA
Fluphenazine	0.03	7.44	26.19	ERBB2, EGFR
Thioridazine Hydrochloride BOSS	0.03	7.44	26.19	CASP1, PPARG
Efavirenz BOSS	0.03	7.44	26.19	PRDX2, IL6
Imipramine CTD 00006140	0.03	7.44	26.19	PARP1, CASP3
Otssp167 Mrc	0.001	7.41	55.12	PRKCG, MAPK11, MAPK8, MAPK14, MAPK12
Clotrimazole	0.001	7.36	45.12	JUN, MAPK1, PPARG, PTGS2
Thioridazine PC3 UP	0.001	7.35	91.34	JUN, IL6, CEBPB, CDKN1A, DUSP1, HMOX1, FOS, PTGS2, FGF2
Lomustine PC3 DOWN	0.001	7.34	54.3	GUCY1A3, PLAU, IL1B, PECAM1, PPARG
Leflunomide	0.13	7.27	14.9	CASP3
Prazosin	0.13	7.27	14.9	MMP9
Methysergide	0.13	7.27	14.9	MYC
Gw779439x Gsk	0.13	7.27	14.9	CDK4
Dovitinib RBC	0.13	7.27	14.9	RET
Gefitinib FDA	0.13	7.27	14.9	EGFR
Gefitinib Kinome Scan	0.13	7.27	14.9	EGFR
Chembl1241473 Roche	0.13	7.27	14.9	MAPK8
Etilefrine HL60 UP	0.13	7.27	14.9	IL1B
Loperamide MCF7 UP	0.13	7.27	14.9	VEGFA
Oxyphenbutazone MCF7 UP	0.13	7.27	14.9	HMOX1
Pioglitazone PC3 DOWN	0.13	7.27	14.9	PLAU
Pramocaine PC3 DOWN	0.13	7.27	14.9	ATM
Pyrimethamine PC3 UP	0.13	7.27	14.9	PTGS2
Salbutamol HL60 UP	0.13	7.27	14.9	PECAM1
Salsolidin PC3 UP	0.13	7.27	14.9	YY1
Ticlopidine MCF7 UP	0.13	7.27	14.9	VEGFA
Iodoacetamide BOSS	0.13	7.27	14.9	IL6
Sn-Glycerol 3-Phosphate BOSS	0.13	7.27	14.9	TNF
Probenecid BOSS	0.13	7.27	14.9	PRDX2
Gemfibrozil BOSS	0.13	7.27	14.9	JUN
Hydralazine BOSS	0.13	7.27	14.9	ACE
4-Oxoretinol Ctd 00001912	0.13	7.27	14.9	FAS
Etomidate CTD 00005947	0.13	7.27	14.9	CFTR
2,6-Dichloro-4-Nitrophenol Ctd 00000815	0.13	7.27	14.9	CASP3
Captan Ctd 00005571	0.13	7.27	14.9	MAPK1
1-Methylphenanthrene Ctd 00001894	0.13	7.27	14.9	CDKN1A
Aripiprazole CTD 00003220	0.13	7.27	14.9	PRL
Tyrphostin AG 879 CTD 00002961	0.13	7.27	14.9	IL6
Triamterene CTD 00006923	0.13	7.27	14.9	PPARG
1-Naphthyl Isothiocyanate CTD 00007020	0.13	7.27	14.9	TGFB1
Etomidate TTD 00007946	0.13	7.27	14.9	CFTR
Cholecalciferol TTD 00007153	0.13	7.27	14.9	PPARG
Vanoxerine TTD 00011764	0.13	7.27	14.9	MTOR
Tozasertib TTD 00011505	0.13	7.27	14.9	RET
Idarubicin Hydrochloride	0.03	7.27	25.29	IL1B, PPARG
Deferoxamine PC3 UP	0.03	7.27	25.29	DUSP1, VEGFA
Etynodiol HL60 DOWN	0.03	7.27	25.29	IL1B, PTGS2
Hexetidine MCF7 UP	0.03	7.27	25.29	JUN, HMOX1
Minocycline HL60 UP	0.03	7.27	25.29	JAG1, VEGFA
Oxolinic Acid HL60 DOWN	0.03	7.27	25.29	TGFB1, HRAS
Trifluoperazine BOSS	0.03	7.27	25.29	SMAD3, MAPK1
Gefitinib	0.001	7.27	44.3	ERBB2, KDR, MAPK14, EGFR
Gedunin CTD 00003449	0.001	7.19	43.51	JAG1, CASP3, HMOX1, EGFR
Strophanthidin MCF7 UP	0.03	7.11	24.43	JUN, DUSP1
Benzbromarone BOSS	0.03	7.11	24.43	PPARG, TNF
Tae-684 Kinome Scan	0.001	7.06	85.46	ALK, RET, MAPK8, CDK4, ERBB2, KDR, MAPK1, EGFR, MAPK3
Lomustine MCF7 UP	0.01	7.06	33.34	CEBPB, HMOX1, VEGFA
Vinblastine CTD 00006986	0.001	7.05	93.83	JUN, IL6, MAPK8, PARP1, PLAU, MYC, IL1B, CASP3, ERBB2, VEGFC
Calmidazolium MCF7 UP	0.001	7.03	76.4	JUN, CEBPB, DUSP1, MYC, HMOX1, HES1, FOS, VEGFA
5,6-Benzoflavone Ctd 00007276	0.001	7.03	76.4	JUN, IL6, IL1B, CASP1, HMOX1, MAPK1, FOS, MAPK3
Glycidamide CTD 00002776	0.001	7.02	50.49	DUSP1, MYC, TIMP2, HMOX1, MAPK12
Pyrvinium HL60 UP	0.001	7.01	58.93	JUN, CEBPB, JAG1, DUSP1, CASP1, FOS
1'-Acetoxychavicol Acetate CTD 00002113	0.001	69.33	3335.49	PARP1, TRAF1, PTGS2, TNF, MMP9, NFKB1, VEGFA, CCND1, MYC, IL1B, BCL2, MAPK1, MAPK3
Shogaol CTD 00001852	0.001	68.57	2293.15	PARP1, NOS2, CASP3, BCL2, FAS, HMOX1, BAX, PTGS2, MMP9
Iloprost Ctd 00007112	0.001	68.57	1550.12	PTGIR, IL6, IL1B, MAPK1, FGF2, MAPK3
Urethane CTD 00006966	0.001	68.57	1550.12	IL6, CCND1, IFNG, IL1B, HRAS, IL2
Phylloquinone CTD 00006555	0.001	68.57	1550.12	JUN, CASP3, BCL2, MAPK1, FOS, MAPK3
Alpinumisoflavone CTD 00000003	0.001	68.57	1550.12	PARP1, CASP3, STAT3, BCL2, FAS, BAX
Ah 6809 Ctd 00002290	0.001	67.88	3487.63	JUN, PARP1, FOS, PTGS2, EGFR, NFKB1, MYC, CASP3, BCL2, AKT1, MAPK1, BAX, CTNNB1, MAPK3
Anacardic Acid C15:3 CTD 00003117	0.001	67.69	2741.29	CCND1, MYC, CASP3, IL1B, BCL2, EP300, PTGS2, TNF, MMP9, NFKB1, VEGFA
Flavanone Ctd 00001352	0.001	67.37	1997.7	RB1, CDKN1A, PARP1, CASP3, PTEN, FAS, BAX, PPARG
2-Aminobiphenyl Ctd 00000776	0.001	66.67	1254.47	JUN, MAPK1, PPARG, PTGS2, MAPK3
Kt 5720 Ctd 00002405	0.001	66.67	1254.47	IL1B, CASP3, MAPK1, TNF, MAPK3
Ar-A014418 Ctd 00004251	0.001	66.67	1254.47	CCND1, CDK4, CASP3, BAX, MITF
Go 6976 TTD 00008282	0.001	66.67	1254.47	MAPK11, MAPK8, AKT1, MAPK14, MAPK12
Heme TTD 00008407	0.001	66.67	1254.47	NOS2, NOS3, HMOX1, NOS1, PTGS2
Luronit CTD 00006106	0.001	66.67	3644.44	SMAD2, JUN, SMAD3, EGFR, VEGFA, PIK3CA, PLAU, CASP10, CASP3, IL1B, EP300, MAPK1, CTNNB1, CFTR, MAPK3
Nvp-Tae684 Ctd 00004657	0.001	65.88	1704.56	ALK, STAT3, ERBB2, AKT1, MAPK1, EGFR, MAPK3
Bisindolylmaleimide Iv CTD 00003116	0.001	65.88	1704.56	CDKN1A, IL6, AKT1, MAPK1, TNF, EGFR, MAPK3
24939-16-0 Ctd 00001660	0.001	65.45	2154.82	SMAD2, SMAD3, PLAU, WT1, MMP2, TIMP2, HMOX1, PPARG, MMP9
Pd 168393 CTD 00004570	0.001	64	1414.41	CDKN1A, MAPK8, CASP3, MAPK1, EGFR, MAPK3
Pci-24781 Ctd 00004605	0.001	64	1414.41	CDKN1A, PARP1, MYC, CASP3, HMOX1, NFKB1
Tazarotene CTD 00003089	0.001	64	1414.41	RB1, CASP3, BCL2, BAX, MAPK1, MAPK3
Carboxyamidotriazole CTD 00002547	0.001	64	1414.41	PARP1, CCND1, CASP3, AKT1, MAPK1, MAPK3
Goniothalamin CTD 00003401	0.001	64	1865.46	PARP1, NOS3, CASP3, BCL2, BAX, NOS1, TNF, NFKB1
Lonafarnib CTD 00003616	0.001	64	2316.69	CCND1, CASP3, BCL2, AKT1, TRAF1, PTGS2, TNF, HRAS, MMP9, NFKB1
Andrographolide CTD 00001445	0.001	63.26	3844.63	RB1, CDKN1A, JUN, TGFB1, STAT3, FOS, VEGFA, CCND1, CDK4, CASP3, KDR, BCL2, AKT1, MAPK1, FAS, BAX, MAPK3
15442-64-5 Ctd 00000915	0.001	62.86	2481.88	CDKN1A, IL6, CASP3, IL1B, HMOX1, MAPK1, PPARG, FOS, PTGS2, TNF, MAPK3
Nsc321521 Ctd 00005452	0.001	62.86	2481.88	RB1, CDKN1A, IL6, PARP1, CASP3, IL1B, STAT3, BCL2, HMOX1, PTGS2, TNF
Acitretin CTD 00007146	0.001	62.61	2030.38	PARP1, CCND1, CASP3, STAT3, BCL2, FAS, BAX, MAPK1, MAPK3
Pterostilbene CTD 00003490	0.001	62.37	5105	CDKN1A, PARP1, NOS2, STAT3, PTGS2, MAPK14, TNF, MMP9, EGFR, NFKB1, MAPK8, CCND1, IFNG, MYC, CASP3, IL1B, BCL2, SNAI1, AKT1, HMOX1, MAPK1, BAX, MAPK3
Selenium(6+) CTD 00002696	0.001	62.22	1579.54	CDKN1A, CASP3, BCL2, AKT1, BAX, MAPK1, MAPK3
Alvespimycin CTD 00004027	0.001	62.22	1579.54	ALK, CDKN1A, PARP1, CCND1, CDK4, MYC, CASP3
Wogonin CTD 00003053	0.001	61.54	2198.03	CCND1, CDK4, CASP3, MMP2, BCL2, MAPK1, BAX, CTNNB1, MMP9, MAPK3
Benzo[G][1]Benzofuran-8,9-Dione CTD 00002819	0.001	61.54	1128.4	CASP3, STAT3, BCL2, AKT1, BAX
1-Bromopropane Ctd 00003657	0.001	61.54	1128.4	IL1B, MAPK1, PTGS2, NFKB1, MAPK3
Roxithromycin CTD 00007073	0.001	61.54	1128.4	IL6, NOS2, IL1B, BCL2, TNF
Amifostine CTD 00005933	0.001	61.54	1128.4	CDKN1A, MYC, CASP3, BCL2, BAX
15(R)-Prostaglandin D2 Ctd 00007048	0.001	61.54	1128.4	PARP1, IL1B, CASP3, PPARG, TNF
1,1,1-Trifluorohenicosa-6,9,12,15-Tetraen-2-One CTD 00002973	0.001	61.54	1128.4	MAPK1, PTGS2, TNF, VEGFA, MAPK3
Ginkgolide B CTD 00002038	0.001	61.54	1128.4	MAPK8, CASP3, AKT1, MAPK1, MAPK3
1H-Pyrrole-2,5-Dione, 3,4-Diphenyl- TTD 00000418	0.001	61.54	1128.4	PRKCG, CCND1, CDK4, ERBB2, KDR
1H-Pyrrole-2,5-Dione, 3,4-Bis(4-Methoxyphenyl)- TTD 00000417	0.001	61.54	1128.4	PRKCG, CCND1, CDK4, ERBB2, KDR
Agn-Pc-00bune Ttd 00001660	0.001	61.54	1128.4	PRKCG, CCND1, CDK4, ERBB2, KDR
Honokiol CTD 00000234	0.001	60.69	2367.67	TGFB1, PARP1, NOS2, CASP3, IL1B, MAPK1, BAX, PPARG, PTGS2, TNF, MAPK3
Melitten CTD 00006261	0.001	60.38	4246.15	JUN, NOS2, MMP2, STAT3, PTGS2, TNF, FGF2, MMP9, EGFR, NFKB1, VEGFA, CASP3, IL1B, KDR, BCL2, AKT1, MAPK1, FAS, BAX, MAPK3
2-Tert-Butyl-4-Methoxyphenol CTD 00005547	0.001	60	2538.85	MAPK8, JUN, PARP1, CASP3, IL1B, HMOX1, MAPK1, COX2, FOS, TNF, ESR2, MAPK3
Terbinafine CTD 00001890	0.001	60	1298.12	MMP2, MAPK1, TNF, MMP9, RHOA, MAPK3
Lapatinib CTD 00004348	0.001	60	1298.12	CCND1, ERBB2, AKT1, MAPK1, EGFR, MAPK3
Raloxifene CTD 00007367	0.001	7	269.19	RB1, RET, CEBPB, CDKN1A, PRL, PTGS2, TNF, EGFR, CCND1, PLAU, CALD1, MYC, CASP3, AKT1, HMOX1, MAPK1, MAPK3, CREBBP, JUN, JAG1, ACE, NOS2, STAT3, DYNLL1, MMP9, ESR2, VEGFA, IL6, BCL2, BAX
Resveratrol CTD 00002483	0.001	7	695.37	RB1, RET, CDKN1A, PTEN, BRCA1, TNF, FGF2, MIR203A, CCND1, PLAU, CASP10, MYC, CASP3, KDR, CASP1, AKT1, EP300, NOS1, HRAS, PARP1, PRKCB, DUSP1, MMP2, IL13, MITF, TRAF1, FOS, DYNLL1, MMP9, ETV4, DDB2, SFRP1, PIK3CA, IFNG, IL1B, PECAM1, PPARG, NOTCH1, CXCR4, PTGS2, EGFR, MAPK8, ERBB2, HMOX1, MAPK1, HES1, MAPK3, SMAD2, CREBBP, JUN, TGFB1, SMAD3, NOS2, NOS3, STAT3, MAPK14, NFKB1, ESR2, IL2, MTOR, VEGFA…
Crotonaldehyde Ctd 00000669	0.001	6.96	75.02	IL6, CCND1, IFNG, IL1B, HMOX1, TNF, IL2, RAB22A
Bisacodyl	0.13	6.96	13.96	IL1B
Sunitinib RBC	0.13	6.96	13.96	RET
Corbadrine PC3 UP	0.13	6.96	13.96	DUSP1
Ethaverine PC3 UP	0.13	6.96	13.96	DUSP1
Sisomicin HL60 DOWN	0.13	6.96	13.96	YY1
Tracazolate HL60 DOWN	0.13	6.96	13.96	PTGS2
Raltegravir BOSS	0.13	6.96	13.96	PRDX2
Triamterene BOSS	0.13	6.96	13.96	PPARG
Guanosine 5'-Monophosphate Disodium Salt BOSS	0.13	6.96	13.96	VEGFA
Ifosfamide CTD 00006138	0.13	6.96	13.96	BCL2
4-Methylumbelliferone CTD 00006134	0.13	6.96	13.96	CASP3
Fluphenazine Ctd 00005991	0.13	6.96	13.96	PRL
Methyl Parathion Ctd 00006309	0.13	6.96	13.96	CDKN1A
Lansoprazole TTD 00008902	0.13	6.96	13.96	PPARG
Tyrphostin B42 TTD 00011609	0.13	6.96	13.96	EGFR
Quinacrine TTD 00010448	0.13	6.96	13.96	MTOR
Triamterene TTD 00011539	0.13	6.96	13.96	PPARG
Amiodarone	0.03	6.96	23.62	ERBB2, MTOR
Nifedipine TTD 00009669	0.03	6.96	23.62	MAPK1, NFKB1
Tamoxifen	0.01	6.96	32.58	ERBB2, EGFR, ESR2
Pkr Inhibitor Mrc	0.001	6.96	41.25	MAPK8, MAPK1, MAPK12, MAPK3
Arsenic Ctd 00005442	0.001	6.94	330.93	RET, CEBPB, CDKN1A, CXCR4, PRL, PTGS2, TNF, EGFR, PRDX2, NRAS, MAPK8, CCND1, TIMP2, HMOX1, COX2, MAPK1, MAPK3, TGFB1, PARP1, DUSP1, NOS3, MMP2, STAT3, FOS, MMP9, NFKB1, IL2, VEGFA, DDB2, IL6, IFNG, CDK4, IL1B, BCL2, PECAM1, CTNNB1, PPARG
Sorafenib	0.001	6.9	49.08	RET, MAPK11, KDR, MAPK14, MAPK12
Pd-173955 Kinome Scan	0.001	6.9	49.08	RET, MAPK11, KDR, MAPK14, EGFR
Melphalan CTD 00006262	0.001	6.88	106.64	SMAD2, SMAD3, IL1B, CASP3, BCL2, BAX, MAPK1, MITF, FANCC, PTGS2, TNF, MAPK3
Diethylstilbestrol CTD 00005818	0.001	6.87	89.81	CREBBP, CEBPB, JAG1, CCND1, DLX4, MYC, CASP3, EP300, PRL, ESR2
Tretinoin HL60 DOWN	0.01	6.86	31.84	WT1, MYC, BCL2
Indometacin PC3 UP	0.03	6.81	22.85	HMOX1, VEGFA
Loxapine PC3 UP	0.03	6.81	22.85	SMAD3, ATM
Carbamazepine BOSS	0.03	6.81	22.85	ACE, TNF
1-Amino-4-Hydroxyanthraquinone Ctd 00003422	0.03	6.81	22.85	IL1B, PPARG
Valinomycin MCF7 UP	0.001	6.81	39.84	CEBPB, JUN, MYC, VEGFA
1,4-Chrysenequinone PC3 UP	0.001	6.72	47.07	JUN, CDKN1A, DUSP1, HMOX1, FOS
Carmustine CTD 00005595	0.001	6.71	150.29	CEBPB, CDKN1A, NOS2, FANCC, TRAF1, PRL, FGF2, NFKB1, IL6, MSH2, APC, CCND1, WT1, CASP3, BCL2, BAX, AKT1, HMOX1
Cp466722 Lincs	0.001	6.67	46.43	RET, MAPK11, MAPK8, PIK3CA, MTOR
Felodipine	0.14	6.67	13.12	NFKB1
Prazepam	0.14	6.67	13.12	PPARG
Liothyronine	0.14	6.67	13.12	PPARG
Etomidate	0.14	6.67	13.12	CFTR
Idarubicin	0.14	6.67	13.12	MTOR
Ritonavir	0.14	6.67	13.12	PPARG
Dactinomycin	0.14	6.67	13.12	PPARG
Clomiphene Citrate	0.14	6.67	13.12	BRCA1
Demeclocycline Hydrochloride	0.14	6.67	13.12	ESR2
Go 7874 MRC	0.14	6.67	13.12	AKT1
Stock1n-35874 Pc3 Up	0.14	6.67	13.12	BAX
Estropipate PC3 UP	0.14	6.67	13.12	ATM
Felodipine PC3 UP	0.14	6.67	13.12	HMOX1
Isotretinoin PC3 UP	0.14	6.67	13.12	HMOX1
Skimmianine HL60 DOWN	0.14	6.67	13.12	CPD
Tolazamide MCF7 UP	0.14	6.67	13.12	ATM
Adenylyl Sulfate BOSS	0.14	6.67	13.12	TNF
Paroxetine BOSS	0.14	6.67	13.12	MTOR
L-Methionine CTD 00006293	0.14	6.67	13.12	MAPK8
Etya Ctd 00007037	0.14	6.67	13.12	DUSP1
Clopidogrelum [Latin] Ctd 00002343	0.14	6.67	13.12	IL6
Hexane Ctd 00001239	0.14	6.67	13.12	HMOX1
Tozasertib CTD 00004298	0.14	6.67	13.12	RET
S-1,2-Dichlorovinyl-N-Acetylcysteine CTD 00002159	0.14	6.67	13.12	CXCL14
Ofloxacin CTD 00007052	0.14	6.67	13.12	IL1B
Ly-367,265 Ttd 00009067	0.14	6.67	13.12	IL1B
Phytoestrogens CTD 00007437	0.04	6.67	22.11	IL6, ESR2
Hg-6-64-01 Lincs	0.001	6.62	53.65	RET, MAPK11, ERBB2, KDR, MAPK14, EGFR
Prenylamine MCF7 UP	0.001	6.62	53.65	JUN, CEBPB, DUSP1, HMOX1, FOS, VEGFA
Gdc-0941 Ctd 00004868	0.001	6.6	177.92	RB1, CDKN1A, PARP1, PTEN, TNF, EGFR, MTOR, VEGFA, IL6, CCND1, PIK3CA, WT1, SCO2, MYC, CASP3, ERBB2, BCL2, BAX, AKT1, MAPK1, KRAS, MAPK3
15-Delta Prostaglandin J2 HL60 DOWN	0.001	6.6	37.86	SCO2, WT1, MYC, BCL2
Mercury Ctd 00006274	0.001	6.59	122.27	SMAD2, MMP2, TNF, FGF2, MMP9, NFKB1, ESR2, SFRP1, IL6, IFNG, MYC, IL1B, CASP3, FAS, HMOX1
Fulvestrant PC3 DOWN	0.001	6.58	53.04	IL6, PLAU, CALD1, MAPK1, EGFR, VEGFA
Etoposide HL60 UP	0.001	6.53	52.44	JUN, CDKN1A, IL1B, CASP1, PTGS2, NFKB1
Pazopanib FDA	0.04	6.53	21.42	RET, KDR
Pazopanib Kinome Scan	0.04	6.53	21.42	RET, KDR
Clioquinol PC3 UP	0.04	6.53	21.42	HMOX1, PTGS2
Etoposide HL60 DOWN	0.04	6.53	21.42	MYC, BCL2
Dichloromethane Ctd 00006313	0.04	6.53	21.42	CXCR4, HMOX1
Dasatinib TTD 00007441	0.04	6.53	21.42	SMAD3, PPARG
Ciclopirox PC3 UP	0.001	6.53	37.23	CDKN1A, DUSP1, CXCR4, VEGFA
Indole-3-Acetic Acid BOSS	0.01	6.49	29.14	PRDX2, HMOX1, DYNLL1
Alexidine MCF7 UP	0.001	6.46	36.62	CEBPB, SMAD3, MYC, VEGFA
Tetrahydropalmatine CTD 00000745	0.001	6.44	51.27	CALD1, CASP3, BCL2, BAX, HMOX1, MTOR
Theophylline CTD 00006862	0.001	6.44	147.44	RB1, SMAD2, TGFB1, PARP1, IL13, STAT3, VEGFC, TRAF1, TNF, NFKB1, IL6, CCND1, IFNG, SCO2, MYC, IL1B, CASP3, BCL2, PPARG
Lansoprazole	0.15	6.4	12.35	PPARG
Triazolam	0.15	6.4	12.35	CREBBP
Gw768505a Gsk	0.15	6.4	12.35	RET
Alw-Ii-49-7 Lincs	0.15	6.4	12.35	MAPK14
5194442 Mcf7 Up	0.15	6.4	12.35	HMOX1
Fluvastatin PC3 UP	0.15	6.4	12.35	IL1B
Letrozole HL60 UP	0.15	6.4	12.35	CXCR4
Lycorine MCF7 DOWN	0.15	6.4	12.35	RET
Metanephrine PC3 UP	0.15	6.4	12.35	DUSP1
Salbutamol PC3 UP	0.15	6.4	12.35	DUSP1
Demeclocycline Hydrochloride Boss	0.15	6.4	12.35	ESR2
Benzthiazide BOSS	0.15	6.4	12.35	PRDX2
Enkephalin BOSS	0.15	6.4	12.35	IL6
Perhexiline Ctd 00006493	0.15	6.4	12.35	MTOR
Norethindrone CTD 00006418	0.15	6.4	12.35	VEGFA
Ergocryptine CTD 00003346	0.15	6.4	12.35	CASP3
Pentamidine CTD 00006482	0.15	6.4	12.35	ATM
Lovastatin TTD 00009034	0.15	6.4	12.35	AKT1
Chlorpromazine	0.04	6.4	20.75	ERBB2, EGFR
Cabozantinib FDA	0.04	6.4	20.75	RET, KDR
Ethylbenzene Ctd 00000178	0.04	6.4	20.75	CXCR4, HMOX1
O-Xylene Ctd 00001228	0.04	6.4	20.75	CXCR4, HMOX1
5-Fluorouracil Ctd 00005987	0.001	6.39	381.58	RB1, GUCY1B3, CEBPB, CDKN1A, PTEN, CXCR4, BRCA1, PTGS2, TNF, FGF2, ETS1, EGFR, CCND1, PLAU, MYC, CASP3, ERBB2, CASP1, AKT1, MAPK1, HES1, HRAS, MAPK3, JUN, TGFB1, JAG1, PARP1, NOS2, IFNB1, MMP2, STAT3, FANCC, FOS, MMP9, NFKB1, RHOA, VEGFA, DDB2, IL6, MSH2, IFNG, IL1B, CPD, BCL2, FAS, BAX, PPARG, KRAS
Genistein CTD 00007324	0.001	6.37	388.38	RB1, CDKN1A, PTEN, BRCA1, TNF, CXCL14, CCND1, PLAU, CASP10, MYC, CASP3, TIMP2, AKT1, PARP1, DUSP1, MMP2, FOS, MMP9, IFNG, IL1B, PPARG, CFTR, CEBPB, CXCR4, PTGS2, EGFR, HMOX1, MAPK1, HES1, MAPK3, JUN, TGFB1, SMAD3, NOS2, NOS3, STAT3, VEGFC, FANCC, NFKB1, ESR2, VEGFA, MAPK11, IL6, CDK4, BCL2, FAS, BAX, ATM, KRAS
17-Ethynyl Estradiol CTD 00005932	0.001	6.32	92.07	JUN, JAG1, NOS2, MYC, CASP1, PTEN, MAPK1, PRL, FOS, PTGS2, TNF, ESR2
Withaferin A MCF7 UP	0.01	6.32	27.92	DUSP1, HMOX1, VEGFA
Ac1l1fuw Ctd 00002630	0.01	6.32	27.92	RB1, CASP1, PPARG
0297417-0002b Pc3 Up	0.001	6.3	42.27	IL6, CDKN1A, CALD1, PTGS2, VEGFA
4-Hydroxytamoxifen Ctd 00000850	0.001	6.28	170.34	RET, JUN, CDKN1A, DUSP1, FOS, MAPK14, DYNLL1, TNF, MAPK12, EGFR, ESR2, MTOR, VEGFA, MAPK11, MAPK8, MSH2, CCND1, MYC, ERBB2, BCL2, AKT1, MAPK1, MAPK3
5155877 Mcf7 Up	0.04	6.27	20.12	HMOX1, VEGFA
Apigenin MCF7 UP	0.04	6.27	20.12	RET, CDKN1A
Choline CTD 00005662	0.04	6.27	20.12	SFRP1, MMP2
Cantharidin HL60 UP	0.001	6.2	41.18	JUN, DUSP1, HES1, FOS, PTGS2
Bortezomib CTD 00003736	0.001	6.2	248.38	RB1, CEBPB, CDKN1A, CXCR4, BRCA1, PTGS2, TNF, MAPK8, CCND1, MYC, CASP3, ERBB2, KDR, AKT1, HMOX1, MAPK1, MAPK3, JUN, ACE, PARP1, STAT3, MAPK14, MMP9, ETV4, NFKB1, IL2, VEGFA, IL6, WT1, BCL2, FAS, BAX, CTNNB1, ATM
Thioridazine MCF7 UP	0.001	6.19	47.98	JUN, DUSP1, CXCR4, HES1, FOS, VEGFA
Dobutamine	0.15	6.15	11.65	EGFR
Masoprocol	0.15	6.15	11.65	NFKB1
Xmd-12 Lincs	0.15	6.15	11.65	RET
Amprolium PC3 UP	0.15	6.15	11.65	YY1
Celastrol MCF7 DOWN	0.15	6.15	11.65	BCL2
Ebselen MCF7 UP	0.15	6.15	11.65	HMOX1
Flunisolide HL60 UP	0.15	6.15	11.65	DUSP1
Isoetarine PC3 UP	0.15	6.15	11.65	DUSP1
Metixene PC3 UP	0.15	6.15	11.65	CDKN1A
Coumestrol Boss	0.15	6.15	11.65	CASP3
Lithocholic Acid Boss	0.15	6.15	11.65	MAPK1
Hydroxylamine BOSS	0.15	6.15	11.65	CASP3
Indolo[3,2-B]Carbazole CTD 00002853	0.15	6.15	11.65	FOS
Tyrphostin 23 CTD 00002512	0.15	6.15	11.65	NFKB1
Aa-861 TTD 00001419	0.15	6.15	11.65	PPARG
Idarubicin Ttd 00008526	0.15	6.15	11.65	MTOR
Econazole Nitrate TTD 00007779	0.15	6.15	11.65	MAPK1
(-)-Isoprenaline PC3 UP	0.04	6.15	19.52	DUSP1, PTGS2
Isoetarine HL60 UP	0.04	6.15	19.52	PECAM1, HPR
Securinine PC3 UP	0.04	6.15	19.52	DUSP1, HMOX1
20255-95-2 Boss	0.04	6.15	19.52	PRDX2, IL6
1-Hydroxypyrene Ctd 00001593	0.04	6.15	19.52	JAG1, ESR2
Bosutinib LINCS	0.01	6.15	26.77	RET, ERBB2, EGFR
Axitinib	0.001	6.1	33.25	RET, MAPK8, KDR, EGFR
Bromocriptine HL60 DOWN	0.001	6.1	33.25	SCO2, WT1, MYC, BCL2
Terfenadine MCF7 UP	0.001	6.09	53.23	JUN, CEBPB, DUSP1, HMOX1, HES1, FOS, VEGFA
Clonidine HL60 UP	0.01	6.08	26.23	IL1B, PECAM1, PTGS2
Antimony Ctd 00005424	0.01	6.08	26.23	CDKN1A, DUSP1, HMOX1
Premarin CTD 00005926	0.001	6.04	72.06	RET, CDKN1A, CCND1, MYC, IL1B, ERBB2, BCL2, PTEN, HRAS, ESR2
Nvp-Tae684 Lincs	0.001	6.04	59.02	ALK, RET, MAPK8, ERBB2, KDR, MAPK1, EGFR, MAPK3
Colforsin MCF7 UP	0.001	6.04	32.73	DUSP1, MYC, BCL2, CXCR4
2,6,9,9-Tetramethylcycloundeca-2,6,10-Trien-1-One CTD 00003763	0.001	59.26	2089.52	CCND1, PARP1, MYC, BCL2, TRAF1, PTGS2, TNF, MMP9, NFKB1, VEGFA
Ici 118551 CTD 00001255	0.001	59.26	2089.52	RB1, MMP2, BCL2, MAPK1, BAX, PTGS2, TNF, MMP9, MAPK3, VEGFA
Pamidronate CTD 00000975	0.001	58.95	1469.62	IL6, PARP1, CASP3, BCL2, MAPK1, TNF, RHOA
Dicumarol CTD 00005515	0.001	58.67	2262.26	RB1, CDKN1A, MAPK8, JUN, IL1B, MAPK1, PPARG, TNF, MMP9, NFKB1, MAPK3
Calyculin A CTD 00002466	0.001	58.18	1642.28	RB1, CREBBP, CASR, CCND1, STAT3, CTNNB1, AKT1, FOS
3-Aminobenzamide CTD 00001175	0.001	58.18	1642.28	RB1, JUN, CDKN1A, PARP1, CCND1, MYC, CTNNB1, ATM
Alantolactone CTD 00000137	0.001	58.18	848.51	PARP1, CASP3, BCL2, BAX
Cortisol Succinate CTD 00000336	0.001	58.18	848.51	IL6, IL1B, TNF, CFTR
Isocarbophos CTD 00005023	0.001	58.18	848.51	BCL2, BAX, MAPK1, MAPK3
Eckol CTD 00002503	0.001	58.18	848.51	CTNNB1, AKT1, MAPK1, MAPK3
Beta-Solamarine CTD 00001251	0.001	58.18	848.51	CASP3, BCL2, FAS, BAX
Diethyl Sulfate CTD 00000613	0.001	58.18	848.51	CASP3, BCL2, HMOX1, BAX
Tyrphostin AG 1478 TTD 00011607	0.001	58.18	848.51	MAPK1, MAPK14, NFKB1, EGFR
Chembl380598 Ttd 00005159	0.001	58.18	848.51	PRKCG, CCND1, CDK4, ERBB2
Tetrachloroethylene Boss	0.001	57.87	3410.2	MMP2, STAT3, PTEN, TNF, EGFR, MTOR, VEGFA, PRDX2, IL6, MYC, CASP3, ERBB2, KDR, BCL2, PPARG, HRAS, MAPK3
Destruxin B CTD 00001859	0.001	57.78	2610.37	JUN, PARP1, MMP2, FOS, MMP9, CCND1, PLAU, MYC, CASP3, BCL2, PECAM1, BAX, CTNNB1
Mebendazole CTD 00006249	0.001	57.6	1815.77	MAPK8, BCL2, MAPK1, BAX, PPARG, FOS, TNF, MAPK3, VEGFA
Allethrin Ctd 00000946	0.001	57.6	1815.77	IFNG, MYC, CASP3, IL1B, BCL2, BAX, PPARG, TNF, MMP9
Hydroxytyrosol CTD 00000267	0.001	57.6	1815.77	JUN, IL6, CASP3, BCL2, MAPK1, PTGS2, TNF, MMP9, MAPK3
Aspartame CTD 00005446	0.001	57.14	1022.84	IL6, KDR, MAPK1, VEGFA, MAPK3
Diazoxide CTD 00005792	0.001	57.14	1022.84	IL6, CCND1, CTNNB1, TNF, NFKB1
Spermine CTD 00006770	0.001	57.14	1022.84	CASR, MAPK8, NOS2, CASP3, BCL2
Methanol CTD 00005338	0.001	57.14	1022.84	IFNG, IL1B, PTGS2, TNF, IL2
Moxifloxacin CTD 00003427	0.001	57.14	1022.84	IFNG, IL1B, MAPK1, TNF, MAPK3
Microcystin LR CTD 00002422	0.001	56.77	2164.7	CDKN1A, IL6, MYC, BCL2, HMOX1, MAPK1, BAX, CTNNB1, TNF, IL2, MAPK3
Brucinum CTD 00003015	0.001	56.47	1197.46	MMP2, CASP3, BCL2, BAX, PTGS2, TNF
Allopurinol CTD 00005353	0.001	56.47	1197.46	DUSP1, IFNB1, HMOX1, FOS, MAPK14, MMP9
Hexachlorobenzene Ctd 00006091	0.001	56.47	1197.46	IFNG, MMP2, MAPK1, MMP9, EGFR, MAPK3
Noscapine CTD 00006427	0.001	56.47	1197.46	CDKN1A, PARP1, CASP3, BCL2, BAX, VEGFA
Ferulic Acid CTD 00000186	0.001	56.47	1197.46	RB1, CDKN1A, CCND1, MAPK1, PTGS2, MAPK3
Mustard Gas BOSS	0.001	55.65	1547.38	IL6, IFNG, MMP2, CASP3, PPARG, TNF, MMP9, EGFR
Citrinin CTD 00005677	0.001	55.65	1547.38	JUN, CDKN1A, MAPK8, IFNG, CASP3, MAPK1, FOS, MAPK3
U-73122 Ctd 00002498	0.001	55.65	1547.38	CASR, MAPK8, IL1B, CASP3, AKT1, MAPK1, EGFR, MAPK3
Lonidamine CTD 00000839	0.001	55.65	1547.38	CASP3, BCL2, AKT1, BAX, MAPK1, PPARG, CFTR, MAPK3
Dehp Ctd 00005816	0.001	55.65	3045.98	MMP2, TNF, MMP9, MTOR, ESR2, VEGFA, PIK3CA, MYC, CASP3, TIMP2, BCL2, AKT1, MAPK1, BAX, PPARG, MAPK3
Temsirolimus BOSS	0.001	55.38	1722.69	PTEN, KDR, BCL2, PPARG, HRAS, EGFR, MTOR, IL2, VEGFA
Antimycin A CTD 00005427	0.001	55.38	1722.69	JUN, PARP1, MMP2, IL1B, BCL2, FAS, MAPK14, TNF, VEGFA
N-Formylmethionylleucylphenylalanine CTD 00006360	0.001	54.86	2250.39	MAPK8, IL6, CASP3, IL1B, AKT1, MAPK1, BAX, PTGS2, MAPK14, TNF, MAPK3, VEGFA
Ozone Ctd 00006460	0.001	54.74	2426.93	CEBPB, TGFB1, PTGS2, TNF, EGFR, MAPK8, IL6, IL1B, AKT1, HMOX1, MAPK1, CFTR, MAPK3
Rottlerin CTD 00003057	0.001	54.05	4577.03	RB1, CDKN1A, PTGS2, EGFR, MAPK8, CCND1, CASP3, AKT1, HMOX1, MAPK1, MAPK3, JUN, PARP1, MMP2, FOS, MAPK14, RHOA, IL2, MTOR, VEGFA, CDK4, BCL2, BAX, PPARG, ATM
Hesperidin CTD 00006087	0.001	53.33	1109.58	IL6, MAPK8, IL1B, PTGS2, TNF, MMP9
Kn-62 Ttd 00008809	0.001	53.33	1109.58	MAPK11, MAPK8, AKT1, MAPK1, MAPK14, MAPK12
Perindopril Ctd 00007376	0.001	53.33	756.44	IL6, ACE, IL1B, TNF
Aminolevulinic Acid CTD 00005375	0.001	53.33	756.44	PARP1, CASP3, BCL2, BAX
Platinum Ctd 00006576	0.001	53.33	756.44	PARP1, MAPK1, PTGS2, MAPK3
Mycophenolate Mofetil CTD 00002572	0.001	53.33	756.44	IL6, CASP3, BCL2, PPARG
Dioxocerium CTD 00001451	0.001	53.33	756.44	HMOX1, MAPK1, MMP9, MAPK3
Probucol CTD 00006616	0.001	53.33	756.44	TGFB1, MMP2, TNF, MMP9
153436-54-5 Ttd 00000374	0.001	53.33	756.44	KDR, MAPK1, EGFR, MAPK3
Egta Ctd 00005889	0.001	53.33	1989.98	MAPK8, CREBBP, IL6, PARP1, NOS3, CASP3, HMOX1, MAPK1, NOS1, MAPK14, MAPK3
Indole-3-Carbinol CTD 00000845	0.001	53.33	3232.58	CDKN1A, PARP1, BRCA1, TRAF1, PTGS2, TNF, MMP9, EGFR, NFKB1, IL6, CCND1, PLAU, CDK4, CASP3, IL1B, BCL2, BAX, PPARG
Polydatin CTD 00002437	0.001	53.33	1285.61	IL6, IFNG, MAPK1, PTGS2, TNF, EGFR, MAPK3
Anandamide CTD 00002912	0.001	53.33	1285.61	IFNG, IL1B, MAPK1, PTGS2, TNF, MMP9, MAPK3
Styrene Oxide CTD 00000717	0.001	53.33	1285.61	CDKN1A, PARP1, MYC, CASP3, BCL2, HMOX1, BAX
Delphinidin CTD 00000884	0.001	53.33	1285.61	JUN, MAPK8, PARP1, CASP3, BCL2, BAX, VEGFA
Bisindolylmaleimide IX TTD 00002468	0.001	53.33	1285.61	MAPK11, MAPK8, SMAD3, AKT1, MAPK1, MAPK14, MAPK12
Acteoside CTD 00002463	0.001	53.33	2520.5	RB1, SMAD2, CDKN1A, TGFB1, SMAD3, PTGS2, TNF, EGFR, IL6, CCND1, IFNG, CDK4, MAPK1, MAPK3
Diallyl Disulfide Ctd 00001321	0.001	53.33	2520.5	JUN, NOS2, NOS3, MMP2, PTGS2, MMP9, MAPK8, CASP3, TIMP2, BCL2, SNAI1, MAPK1, CTNNB1, MAPK3
Gw0742 Ctd 00004254	0.001	53.33	933.29	PARP1, NOS3, MYC, AKT1, PPARG
Cinobufagin CTD 00000078	0.001	53.33	933.29	CDKN1A, PARP1, MYC, BCL2, BAX
Dimaprit CTD 00007150	0.001	53.33	933.29	JUN, IFNG, MYC, FOS, TNF
Trolox CTD 00000557	0.001	53.33	2166.53	MAPK8, IL6, TGFB1, CASP3, IL1B, KDR, MAPK1, FOS, TNF, IL2, MAPK3, VEGFA
Phenylarsine Oxide CTD 00001378	0.001	53.33	2166.53	PARP1, NOS3, CASP3, MMP2, IL1B, STAT3, MAPK1, PTGS2, TNF, MMP9, MTOR, MAPK3
Pazopanib Hydrochloride BOSS	0.001	53.33	1461.55	IL6, ERBB2, KDR, PPARG, MTOR, EGFR, IL2, VEGFA
Prolinedithiocarbamate CTD 00002658	0.001	53.33	1461.55	IL6, IL1B, AKT1, PTGS2, MMP9, TNF, NFKB1, VEGFA
170449-18-0 Ctd 00003361	0.001	52.57	4052.1	CDKN1A, JUN, NOTCH1, JAG1, NOS3, MMP2, STAT3, FOS, PTGS2, MAPK14, TNF, FGF2, MMP9, EGFR, VEGFA, MAPK8, IL6, AKT1, HMOX1, MAPK1, CTNNB1, HES1, MAPK3
Cilostazol CTD 00002032	0.001	52	2264.61	CDKN1A, NOS3, PTEN, TNF, IL6, CASP3, IL1B, BCL2, AKT1, HMOX1, BAX, PPARG, CFTR
Pregna-4,17(20)-Diene-3,16-Dione CTD 00001094	0.001	52	2264.61	CDKN1A, TRAF1, PTGS2, TNF, MMP9, NFKB1, VEGFA, MAPK8, CCND1, MYC, CASP3, IL1B, BCL2
Mancozeb Ctd 00000687	0.001	51.76	1911.48	CCND1, CASP3, IL1B, BCL2, MAPK1, FAS, BAX, PTGS2, TNF, IL2, MAPK3
Xanthohumol CTD 00003425	0.001	51.76	1911.48	IL6, PARP1, CASP3, BCL2, HMOX1, MAPK1, PTGS2, TNF, MMP9, CFTR, MAPK3
Gsno CTD 00007396	0.001	51.61	1735.33	GUCY1A3, NOS2, IFNG, CASP3, BCL2, HMOX1, BAX, ATM, TNF, CFTR
2,4-Diisocyanato-1-Methylbenzene CTD 00006908	0.001	51.61	1735.33	IL6, NOS2, NOS3, IL1B, MAPK1, TNF, MMP9, EGFR, MAPK3, VEGFA
Pepcid Ctd 00007086	0.001	51.43	1559.39	IFNG, IL1B, MAPK1, PPARG, PRL, FOS, TNF, FGF2, MAPK3
Fexofenadine Hydrochloride Ctd 00003191	0.001	51.2	1383.61	IL6, MMP2, TIMP2, MAPK1, TNF, MMP9, NFKB1, MAPK3
Clodronate Disodium Boss	0.001	50.91	1207.94	IL6, IL1B, CASP3, CASP1, TNF, MMP9, VEGFA
Gambogic Acid CTD 00002247	0.001	50.91	1207.94	PARP1, CASP3, BCL2, AKT1, BAX, MAPK1, MAPK3
Rutin Ctd 00006712	0.001	50.73	2190.29	JUN, PTGS2, TNF, EGFR, VEGFA, IL6, IFNG, CASP3, IL1B, BCL2, MAPK1, BAX, MAPK3
Piperine CTD 00000442	0.001	50.53	2014.04	JUN, IL6, MMP2, IL1B, MAPK1, PPARG, BRCA1, FOS, TNF, MMP9, NFKB1, MAPK3
Selegiline CTD 00006730	0.001	50.53	1032.27	JUN, MYC, CASP3, MAPK1, FOS, MAPK3
Trimethyl-Beta-Cyclodextrin CTD 00003512	0.001	50.53	1032.27	CASR, PARP1, CASP3, MAPK1, TNF, MAPK3
1,1,2,2,3,3-Hexabromocyclododecane CTD 00003141	0.001	50.53	1032.27	RB1, CCND1, CDK4, CASP3, HRAS, ESR2
Go 6976 CTD 00002962	0.001	50.29	1838.16	JUN, IL1B, HMOX1, MAPK1, PTGS2, HRAS, MMP9, EGFR, IL2, MAPK3, VEGFA
Entinostat CTD 00003662	0.001	50.29	1838.16	CDKN1A, MAPK8, CCND1, NOS2, IFNG, MMP2, EP300, PTGS2, MMP9, CFTR, VEGFA
Kn-62 Ctd 00002580	0.001	50	856.48	IL1B, MAPK1, FOS, IL2, MAPK3
Rimonabant Hydrochloride CTD 00003133	0.001	50	856.48	PARP1, CCND1, AKT1, MAPK1, MAPK3
Fluazinam CTD 00002848	0.001	50	856.48	SMAD3, CASP3, BCL2, BAX, PPARG
Pentobarbital CTD 00006484	0.001	50	856.48	JUN, MAPK1, KRAS, TNF, MAPK3
Levamisole CTD 00006205	0.001	50	856.48	RB1, NOS3, BCL2, PTGS2, TNF
Sodium Fluoride CTD 00006755	0.001	50	1662.62	CDKN1A, CASP3, IL1B, BCL2, AKT1, MAPK1, FAS, ATM, PTGS2, MAPK3
Benzene CTD 00005481	0.001	5.98	156.4	RB1, JUN, CDKN1A, SMAD3, PARP1, DUSP1, MMP2, CXCR4, MITF, FOS, PTGS2, TNF, MMP9, NFKB1, RAB22A, VEGFA, CCND1, IFNG, CASP3, BCL2, BAX, HMOX1, PPARG
Tg-101348 Kinome Scan	0.001	5.97	38.64	ALK, RET, MAPK8, CDK4, EGFR
Digoxigenin PC3 UP	0.001	5.95	76.52	JUN, IL6, CDKN1A, JAG1, DUSP1, EP300, CXCR4, HES1, FOS, PTGS2, FGF2
Alprazolam	0.16	5.93	11.02	CREBBP
Epinephrine	0.16	5.93	11.02	MTOR
Alexidine HL60 DOWN	0.16	5.93	11.02	JUN
Dobutamine PC3 UP	0.16	5.93	11.02	DUSP1
Niclosamide MCF7 DOWN	0.16	5.93	11.02	RET
Nicotinic Acid PC3 DOWN	0.16	5.93	11.02	YY1
Etomidate BOSS	0.16	5.93	11.02	CFTR
Carfilzomib CTD 00004787	0.16	5.93	11.02	MAPK8
Alpha-D-Mannose TTD 00001913	0.16	5.93	11.02	NOS1
Omeprazole TTD 00009921	0.16	5.93	11.02	PPARG
Chloranil TTD 00007128	0.16	5.93	11.02	MAPK1
Catechol TTD 00002709	0.16	5.93	11.02	MTOR
Chrysin TTD 00007164	0.16	5.93	11.02	PPARG
Masoprocol TTD 00009129	0.16	5.93	11.02	NFKB1
Hki-272 Kinome Scan	0.04	5.93	18.39	ERBB2, EGFR
Geldanamycin HL60 DOWN	0.04	5.93	18.39	MYC, TNF
Hyoscyamine HL60 DOWN	0.01	5.93	25.18	PRDX2, TGFB1, EP300
8-Bromo-Camp, Na CTD 00007044	0.001	5.89	158.65	CDKN1A, TGFB1, JAG1, DUSP1, VEGFC, PRL, PTGS2, TNF, EGFR, ESR2, VEGFA, SFRP1, IL6, APC, MYC, IL1B, CASP3, BCL2, PECAM1, BAX, AKT1, EP300, MAPK1, MAPK3
Dihydroergotamine HL60 UP	0.001	5.88	37.69	CPD, PECAM1, CASP1, PTGS2, DDB2
Silica CTD 00006678	0.001	5.88	219.31	CEBPB, CDKN1A, DLX4, PTGS2, TNF, ETS1, EGFR, MAPK8, CCND1, CASP3, CASP1, HMOX1, EP300, MAPK1, NOS1, MAPK3, GUCY1A2, JUN, TGFB1, PARP1, PRKCB, IL13, VEGFC, TRAF1, FOS, MMP9, NFKB1, IL2, IL6, IL1B, BCL2, FAS, BAX
Phenoxybenzamine MCF7 UP	0.001	5.86	49.93	JUN, CDKN1A, DUSP1, FAS, HMOX1, FOS, VEGFA
Kin001-220 Lincs	0.01	5.85	24.68	RET, MAPK8, EGFR
Pha-793887 Lincs	0.05	5.82	17.86	CDK4, MAPK3
Zidovudine PC3 UP	0.05	5.82	17.86	YY1, HMOX1
Camptothecin MCF7 UP	0.001	5.77	54.5	JUN, CDKN1A, PLAU, DUSP1, SNAI1, CXCR4, HES1, FOS
Picrotoxinin PC3 DOWN	0.001	5.71	47.76	RB1, YY1, SMAD2, CPD, BAX, HMOX1, MAPK14
Sanguinarine MCF7 UP	0.001	5.71	47.76	ALK, JUN, CALD1, DUSP1, CXCR4, FOS, RAB22A
Omeprazole	0.16	5.71	10.43	PPARG
Methysergide Maleate	0.16	5.71	10.43	ESR2
Kin001-127 Lincs	0.16	5.71	10.43	ALK
5155877 Pc3 Up	0.16	5.71	10.43	HMOX1
Fludroxycortide HL60 UP	0.16	5.71	10.43	DUSP1
Flumetasone HL60 UP	0.16	5.71	10.43	DUSP1
Quercetin PC3 DOWN	0.16	5.71	10.43	IL1B
Hexadecanal BOSS	0.16	5.71	10.43	PPARG
Chlorine Boss	0.16	5.71	10.43	IL6
Methysergide Maleate BOSS	0.16	5.71	10.43	ESR2
Dynorphin A Porcine BOSS	0.16	5.71	10.43	MAPK3
Juglone CTD 00000198	0.16	5.71	10.43	CASP1
Retinal CTD 00006694	0.16	5.71	10.43	PPARG
Venlafaxine CTD 00002095	0.16	5.71	10.43	PRL
Propidium Ctd 00006632	0.16	5.71	10.43	VEGFA
2,3-Diformyloxypropyl Formate CTD 00006941	0.16	5.71	10.43	IL1B
Methotrexate TTD 00009239	0.16	5.71	10.43	PPARG
Dibenzo[Def,P]Chrysene CTD 00001899	0.02	5.71	23.73	CDKN1A, FAS, DDB2
Bisphenol A CTD 00000312	0.001	5.71	290.57	RB1, CEBPB, CDKN1A, PTEN, CXCR4, BRCA1, PTGS2, TNF, EGFR, MIR335, CCND1, CASP10, MYC, CASP3, KDR, TIMP2, AKT1, HMOX1, EP300, MAPK1, HRAS, MAPK3, CREBBP, TGFB1, SMAD3, JAG1, DUSP1, NOS3, MMP2, STAT3, FOS, MMP9, NFKB1, ESR2, VEGFA, SFRP1, IL6, IFNG, CDK4, IL1B, BCL2, FAS, BAX, PPARG, KRAS
Methotrexate CTD 00006299	0.001	5.69	136.6	RB1, CDKN1A, TGFB1, PARP1, NOS2, DUSP1, NOS3, PTEN, PRL, BRCA1, MAPK14, TNF, IL2, IL6, IFNG, MYC, IL1B, ERBB2, BCL2, FAS, CTNNB1, PPARG
Staurosporine, Streptomyces Sp. RBC	0.001	5.69	47.34	PRKCG, ALK, RET, PRKCB, CDK4, KDR, AKT1
Bx-795 Mrc	0.05	5.61	16.88	MAPK1, MAPK3
Quercetin TTD 00010442	0.05	5.61	16.88	PIK3CA, NFKB1
Rifabutin PC3 DOWN	0.02	5.58	22.83	SCO2, WT1, VEGFC
Mebendazole HL60 UP	0.001	5.55	73.35	CEBPB, CDKN1A, TGFB1, JAG1, IL1B, PECAM1, ATM, FOS, PTGS2, TNF, MMP9, DDB2
Olanzapine	0.17	5.52	9.9	CFTR
Benfluorex MCF7 UP	0.17	5.52	9.9	VEGFA
Butyl Hydroxybenzoate PC3 DOWN	0.17	5.52	9.9	PLAU
Deferoxamine MCF7 UP	0.17	5.52	9.9	VEGFA
Diflorasone HL60 UP	0.17	5.52	9.9	DUSP1
Isoxsuprine PC3 UP	0.17	5.52	9.9	DUSP1
Mefloquine HL60 UP	0.17	5.52	9.9	CCDC88A
Niclosamide PC3 DOWN	0.17	5.52	9.9	JUN
Norcyclobenzaprine PC3 UP	0.17	5.52	9.9	HMOX1
Pyridoxal Phosphate BOSS	0.17	5.52	9.9	IL6
Lansoprazole BOSS	0.17	5.52	9.9	PPARG
Aa-861 CTD 00001735	0.17	5.52	9.9	PPARG
Perfluorononanoic Acid CTD 00003375	0.17	5.52	9.9	PPARG
Daunorubicin TTD 00007442	0.17	5.52	9.9	PPARG
Perphenazine TTD 00010127	0.17	5.52	9.9	MTOR
Clozapine TTD 00007243	0.17	5.52	9.9	PPARG
Chloroxine TTD 00007143	0.17	5.52	9.9	TNF
Capsazepine TTD 00002673	0.17	5.52	9.9	IL1B
Felodipine MCF7 UP	0.02	5.52	22.4	JUN, DUSP1, FOS
Antimony Potassium Tartrate Ctd 00005425	0.02	5.52	22.4	CDKN1A, DUSP1, HMOX1
Ah-23848 Pc3 Up	0.01	5.52	28.16	JUN, HMOX1, BAX, ATM
Pingyangmycin CTD 00001211	0.02	5.45	21.98	MYC, CASP3, CASP1
Coenzyme A BOSS	0.05	5.42	15.97	IL6, CASP3
Hg-5-113-01 Lincs	0.01	5.42	27.35	ALK, RET, MAPK8, PIK3CA
Otssp167 Lincs	0.001	5.4	48.6	ALK, RET, MAPK8, PIK3CA, CDK4, KDR, AKT1, EGFR
15-Acetyldeoxynivalenol Ctd 00002073	0.02	5.39	21.57	IL1B, CXCR4, TNF
Amiodarone CTD 00005381	0.001	5.38	117.83	ALK, GUCY1A2, GUCY1B3, JUN, CEBPB, PARP1, DUSP1, NOS3, MITF, FOS, PTGS2, TNF, MTOR, VEGFA, IL6, CASP3, BCL2, BAX, AKT1, HMOX1, PPARG
Perphenazine	0.17	5.33	9.4	MTOR
Danazol	0.17	5.33	9.4	MYC
Daunorubicin	0.17	5.33	9.4	PPARG
Indocyanine Green	0.17	5.33	9.4	IL1B
Gw843682 Lincs	0.17	5.33	9.4	RET
Indirubin Derivative E804 Rbc	0.17	5.33	9.4	RET
At-7519 Kinome Scan	0.17	5.33	9.4	CDK4
Gabexate HL60 UP	0.17	5.33	9.4	DUSP1
Monorden PC3 UP	0.17	5.33	9.4	HMOX1
Succinylsulfathiazole PC3 UP	0.17	5.33	9.4	HPR
Fumaric Acid BOSS	0.17	5.33	9.4	PPARG
Aripiprazole BOSS	0.17	5.33	9.4	PRL
Carfilzomib BOSS	0.17	5.33	9.4	BCL2
Mephenesin BOSS	0.17	5.33	9.4	TNF
Trehalose BOSS	0.17	5.33	9.4	CASP3
Perphenazine BOSS	0.17	5.33	9.4	MTOR
Chloranil CTD 00005628	0.17	5.33	9.4	MAPK1
Pyrogallol CTD 00006673	0.17	5.33	9.4	CASP3
7-Amino-4-Hydroxy-2-Naphthalenesulfonic Acid Ttd 00001268	0.17	5.33	9.4	MMP2
Tegaserod Maleate TTD 00011362	0.17	5.33	9.4	MITF
Gnf-Pf-5134 Ttd 00008273	0.17	5.33	9.4	SMAD3
Cephalochromin TTD 00002771	0.05	5.33	15.54	MITF, CFTR
(+)-Chelidonine HL60 UP	0.02	5.33	21.17	DUSP1, CPD, CXCR4
4-Aminobiphenyl Ctd 00000311	0.02	5.33	21.17	MSH2, BRCA1, PTGS2
Rifabutin PC3 UP	0.001	5.3	31.53	GUCY1B3, CDKN1A, CXCR4, MITF, KRAS
Pp-242 Kinome Scan	0.01	5.29	26.21	RET, PIK3CA, EGFR, MTOR
Menadione HL60 UP	0.001	5.27	61.75	CCDC88A, JUN, CDKN1A, DUSP1, MMP2, IL1B, SNAI1, HMOX1, HES1, FOS, PTGS2
Kw-2449 Kinome Scan	0.001	5.22	35.73	ALK, RET, MAPK8, CDK4, KDR, EGFR
Phenoxybenzamine PC3 UP	0.001	5.19	30.47	CEBPB, CDKN1A, DUSP1, HMOX1, FOS
Piperlongumine MCF7 UP	0.001	5.19	40.29	JUN, CDKN1A, DUSP1, CASP3, HMOX1, FOS, VEGFA
Potassium Dichromate Ctd 00006598	0.001	5.18	94.74	JUN, CDKN1A, PARP1, PRKCB, STAT3, TNF, FGF2, VEGFA, IL6, CALD1, MYC, IL1B, CASP3, TIMP2, AKT1, HMOX1, MAPK1, MAPK3
Chir-265/Raf-265 Kinome Scan	0.18	5.16	8.94	RET
Lasalocid HL60 UP	0.18	5.16	8.94	SMAD3
Meglumine PC3 DOWN	0.18	5.16	8.94	HMOX1
Methylbenzethonium Chloride MCF7 UP	0.18	5.16	8.94	VEGFA
Quetiapine BOSS	0.18	5.16	8.94	PRL
Diacetylmorphine BOSS	0.18	5.16	8.94	CASP3
Methimazole CTD 00006291	0.18	5.16	8.94	IL6
Fenvalerate CTD 00000912	0.18	5.16	8.94	ESR2
Aluminum Ctd 00005362	0.18	5.16	8.94	TNF
Menadione TTD 00009191	0.18	5.16	8.94	CFTR
Kin001-111/A770041 Lincs	0.02	5.16	20.04	ERBB2, MAPK1, EGFR
3'-Azido-3'-Deoxythymidine CTD 00007047	0.001	5.13	63.74	IL6, CDKN1A, CCND1, IFNG, CDK4, NOS3, IL1B, CASP3, BCL2, COX2, TNF, IL2
Pkc-412 Kinome Scan	0.01	5.12	24.8	ALK, RET, AKT1, EGFR
Dabrafenib LINCS	0.01	5.12	24.8	MAPK8, CDK4, ERBB2, EGFR
Dabrafenib FDA	0.01	5.12	24.8	MAPK8, CDK4, ERBB2, EGFR
Staurosporine Kinome Scan	0.001	5.08	53.03	ALK, RET, MAPK8, PIK3CA, CDK4, ERBB2, KDR, AKT1, MAPK12, EGFR
Etynodiol HL60 UP	0.06	5.08	14.37	DUSP1, CPD
Resveratrol MCF7 UP	0.06	5.08	14.37	CDKN1A, FAS
Thiostrepton PC3 DOWN	0.06	5.08	14.37	GUCY1A3, IL1B
T0901317 Ctd 00003912	0.06	5.08	14.37	IFNG, TNF
K-252a, Nocardiopsis Sp. RBC	0.01	5.08	24.46	ALK, RET, PRKCB, CDK4
Nintedanib FDA	0.001	5.06	29.14	ALK, RET, MAPK8, CDK4, KDR
BIBF-1120 (Derivative) Kinome Scan	0.001	5.06	29.14	ALK, RET, MAPK8, CDK4, KDR
Cdk1/2 Inhibitor Iii Rbc	0.02	5.05	19.34	RET, CDK4, KDR
Thioguanosine MCF7 UP	0.02	5.05	19.34	CDKN1A, CEBPB, VEGFA
Chlorpromazine Hydrochloride	0.18	5	8.52	PPARG
Ro-3306 Mrc	0.18	5	8.52	MAPK12
Jw-7-24-1 Lincs	0.18	5	8.52	PIK3CA
Etacrynic Acid HL60 UP	0.18	5	8.52	DDB2
Simvastatin PC3 UP	0.18	5	8.52	DUSP1
Indirubin-3'-Monoxime Ttd 00008590	0.18	5	8.52	MAPK1
Ac1nupcx Ttd 00001530	0.18	5	8.52	MITF
Pha-665752 Kinome Scan	0.06	5	14	RET, CDK4
Jwe-035 Lincs	0.06	5	14	RET, PIK3CA
Jnk-9l Lincs	0.06	5	14	MAPK8, CDK4
Cefalotin HL60 DOWN	0.06	5	14	NRAS, UBE3A
Tretinoin MCF7 UP	0.02	5	19	RET, SMAD3, HMOX1
Azd4547 Lincs	0.01	5	23.81	ALK, RET, CDK4, KDR
Dihydroergocristine HL60 DOWN	0.001	5	33.15	WT1, SCO2, CDK4, MYC, BCL2, TNF
Berberine CTD 00005500	0.001	49.78	2296.01	CDKN1A, PARP1, MMP2, TRAF1, TNF, CCND1, CDK4, CASP3, IL1B, BCL2, AKT1, HMOX1, FAS, BAX
P,P'-DDE CTD 00005754	0.001	49.78	2296.01	ALK, CREBBP, PARP1, BRCA1, PTGS2, TNF, ESR2, NFKB1, CCND1, CASP3, BCL2, MAPK1, BAX, MAPK3
2,2'-Bioxirane Ctd 00000347	0.001	49.23	680.38	PARP1, CASP3, BAX, ATM
Dehydroxymethylepoxyquinomicin CTD 00004091	0.001	49.23	680.38	PARP1, CASP3, TNF, NFKB1
Dmat Ctd 00004349	0.001	49.23	680.38	AKT1, MAPK1, NFKB1, MAPK3
Talmapimod CTD 00004435	0.001	49.23	680.38	MAPK8, PARP1, CASP3, MAPK14
Prima-1 CTD 00004034	0.001	49.23	680.38	CDKN1A, CASP3, BAX, VEGFA
Azoxymethane Boss	0.001	48.89	1769.53	IL6, MYC, CASP3, STAT3, BCL2, HMOX1, PPARG, TNF, MMP9, EGFR, VEGFA
Nitroprusside CTD 00006411	0.001	48.81	2867.17	NOS2, NOS3, PTGS2, TNF, FGF2, NFKB1, VEGFA, IFNG, MYC, CASP3, IL1B, BCL2, AKT1, HMOX1, MAPK1, BAX, NOS1, MAPK3
Chonsurid CTD 00005665	0.001	48.7	1138	NOS2, IL1B, PTN, PTGS2, TNF, FGF2, VEGFA
Masoprocol CTD 00006416	0.001	48.48	3155.82	ALK, RB1, JUN, NOS3, STAT3, PTGS2, TNF, NFKB1, VEGFA, CCND1, CASP10, MYC, CASP3, IL1B, ERBB2, AKT1, MAPK1, FAS, BAX, MAPK3
Dibenziodolium CTD 00000351	0.001	48.25	2978.86	CDKN1A, STAT3, MITF, PTGS2, MAPK14, TNF, MMP9, NFKB1, MTOR, VEGFA, MAPK8, IL6, CASP3, IL1B, CASP1, EP300, HMOX1, MAPK1, MAPK3
Thuringiensin BOSS	0.001	48	963.78	IL6, CASP3, IL13, TNF, EGFR, IL2
Sodium Salicylate CTD 00006761	0.001	48	963.78	CDKN1A, PARP1, IL1B, CASP3, PTGS2, TNF
Nimbolide CTD 00001923	0.001	48	963.78	CDKN1A, CCND1, CASP3, BCL2, BAX, NFKB1
Cytochalasin D CTD 00007076	0.001	48	963.78	IL6, NOS2, IFNG, IL1B, TNF, MMP9
Monocrotaline BOSS	0.001	48	1420.97	IL6, CASP3, MMP2, BCL2, HMOX1, TNF, MMP9, MAPK3, VEGFA
7-Hydroxystaurosporine Ctd 00002331	0.001	48	1420.97	RB1, MAPK8, CCND1, PARP1, CASP3, BCL2, PECAM1, MAPK1, MAPK3
Ursolic Acid CTD 00000232	0.001	47.66	2164.66	CDKN1A, TGFB1, PARP1, MMP2, PTGS2, MMP9, MTOR, CCND1, CDK4, CASP3, BCL2, AKT1, BAX, CTNNB1
Sb 202190 Ctd 00003161	0.001	47.47	4149.69	RB1, CDKN1A, CEBPB, PTGS2, TNF, EGFR, MAPK8, PLAU, CASP3, HMOX1, MAPK1, MAPK3, JUN, TGFB1, FOS, MAPK14, MMP9, IL2, MAPK12, VEGFA, MAPK11, IL6, IFNG, IL1B, BCL2, FAS, BAX
Pentoxifylline BOSS	0.001	47.41	1247.52	IL6, ACE, IFNG, CASP3, MMP2, BCL2, MMP9, VEGFA
Artenimol CTD 00001819	0.001	47.41	1247.52	CDKN1A, JUN, CASP3, MMP2, HMOX1, MAPK1, MMP9, MAPK3
Bisindolylmaleimide IX CTD 00002617	0.001	47.41	1247.52	TGFB1, SMAD3, CASP3, IL1B, HMOX1, MAPK1, PTGS2, MAPK3
Acetovanillone CTD 00002374	0.001	47.27	1990.61	JUN, NOS3, IFNB1, PTGS2, TNF, MAPK8, IL6, CASP3, IL1B, EP300, HMOX1, MAPK1, MAPK3
Bisphenol A Diglycidyl Ether Ctd 00000976	0.001	47.06	1531.94	CASP3, PTEN, KDR, BCL2, MAPK1, BAX, PPARG, PTGS2, MAPK3, VEGFA
Calphostin C CTD 00002460	0.001	47.06	789.94	CDKN1A, HMOX1, MAPK1, NFKB1, MAPK3
Mls003171503 Ctd 00005801	0.001	47.06	789.94	CDKN1A, PARP1, IL1B, TNF, CFTR
Methadone CTD 00006284	0.001	47.06	789.94	BAX, MAPK1, PRL, IL2, MAPK3
Puromycin CTD 00006652	0.001	47.06	789.94	CASP3, BCL2, BAX, MITF, VEGFA
Delsemidine CTD 00002328	0.001	47.06	789.94	STAT3, AKT1, MAPK1, TNF, MAPK3
Tyrphostin B42 CTD 00003234	0.001	46.9	2565.47	CREBBP, IFNB1, STAT3, PTGS2, TNF, EGFR, IL6, CCND1, IFNG, MYC, CASP3, BCL2, AKT1, MAPK1, BAX, CFTR, MAPK3
Alpha-Tocopherol CTD 00007387	0.001	46.9	2565.47	JUN, PARP1, NOS3, PTGS2, MAPK14, TNF, NFKB1, MAPK8, IL6, CASP3, BCL2, HMOX1, MAPK1, BAX, PPARG, CFTR, MAPK3
Nitro-L-Arginine BOSS	0.001	46.67	1074.73	ACE, NOS3, CASP3, HMOX1, PPARG, TNF, VEGFA
Jasplakinolide CTD 00002409	0.001	46.67	1074.73	SMAD3, NOS2, IFNG, IL1B, MITF, TNF, CFTR
Doxazosin CTD 00007158	0.001	46.67	1074.73	RB1, CDKN1A, CASP3, BCL2, BAX, MTOR, VEGFA
Everolimus CTD 00003479	0.001	46.67	1074.73	RB1, CCND1, NOS3, CASP3, AKT1, TNF, MTOR
Ci-1040 Ttd 00007168	0.001	46.67	1074.73	MAPK11, MAPK8, AKT1, MAPK1, PPARG, MAPK14, MAPK12
Ranitidine CTD 00006691	0.001	46.45	1359.45	PARP1, IFNG, CASP3, BCL2, MAPK1, BAX, PRL, TNF, MAPK3
Amlodipine CTD 00007164	0.001	46.45	1359.45	RB1, SMAD2, CDKN1A, TGFB1, CCND1, CDK4, CASP3, BCL2, BAX
Nimesulide CTD 00000666	0.001	46.03	3087.6	CDKN1A, JUN, PARP1, VEGFC, PTGS2, TNF, MMP9, VEGFA, IL6, CCND1, IFNG, CASP3, IL1B, BCL2, MAPK1, BAX, CTNNB1, PPARG, HRAS, CFTR, MAPK3
Dacarbazine BOSS	0.001	45.71	902.74	NRAS, MSH2, CASP3, BCL2, IL2, VEGFA
Losartan CTD 00007310	0.001	45.71	902.74	TGFB1, MAPK1, PPARG, TNF, VEGFA, MAPK3
Tdzd-8 Ctd 00004374	0.001	45.71	902.74	CDKN1A, MAPK8, BCL2, AKT1, MAPK1, MAPK3
Metoprolol CTD 00006326	0.001	45.71	902.74	ACE, MMP2, CASP3, PTGS2, MMP9, VEGFA
Allyl Sulfide CTD 00001796	0.001	45.71	1758.86	CDKN1A, MAPK8, NOS2, CASP3, MMP2, BCL2, MAPK1, FAS, BAX, PTGS2, MMP9, MAPK3
Zaprinast CTD 00000589	0.001	45.71	616.63	ACE, MAPK1, VEGFA, MAPK3
Allyl Isothiocyanate Ctd 00000143	0.001	45.71	616.63	CDKN1A, CASP3, MAPK1, MAPK3
Ropivacaina [Spanish] Ctd 00001768	0.001	45.71	616.63	PARP1, CASP3, BCL2, TNF
L-Cysteine CTD 00005741	0.001	45.71	616.63	RET, RB1, CCND1, MMP2
Bms-536924 Ttd 00002497	0.001	45.71	616.63	ERBB2, KDR, AKT1, MAPK1
Bisindolylmaleimide I CTD 00002749	0.001	45.71	2622.7	RB1, CASR, JUN, ACE, PARP1, FOS, PTGS2, MAPK14, TNF, MMP9, EGFR, NFKB1, VEGFA, KDR, AKT1, MAPK1, PPARG, MAPK3
Oxidopamine CTD 00007130	0.001	45.13	1587.82	MAPK8, JUN, PARP1, NOS2, CASP3, TIMP2, HMOX1, BAX, NOS1, PTGS2, MMP9
Fulvestrant BOSS	0.001	45	1302.34	MYC, ERBB2, BCL2, PRL, EGFR, MTOR, ESR2, MAPK3, VEGFA
Enoxaparin CTD 00006081	0.001	45	2567.09	RB1, JUN, MMP2, CXCR4, FOS, TNF, FGF2, MMP9, EGFR, VEGFA, IL6, MYC, CASP3, BCL2, MAPK1, FAS, BAX, MAPK3
105156-22-7 Ctd 00005867	0.001	44.91	2278.03	PARP1, STAT3, TNF, MMP9, IL2, IL6, IFNG, CASP3, IL1B, BCL2, AKT1, HMOX1, FAS, BAX, PPARG, MAPK3
Vemurafenib BOSS	0.001	44.8	1017.25	NRAS, PTEN, BCL2, HRAS, EGFR, IL2, MAPK3
Apicidin CTD 00003381	0.001	44.8	1017.25	CDKN1A, CCND1, CDK4, CASP3, BCL2, BAX, ESR2
Fludioxonil CTD 00003504	0.001	44.8	1017.25	CCND1, PARP1, CASP3, PTEN, BCL2, PPARG, ESR2
Letrozole CTD 00002692	0.001	44.8	1017.25	RB1, CDKN1A, CCND1, MYC, MMP2, MMP9, MTOR
Nsc113090 Ctd 00000067	0.001	44.8	1017.25	CASP3, AKT1, MAPK1, BAX, EGFR, CFTR, MAPK3
Cleland's Reagent CTD 00005862	0.001	44.65	1703.58	MAPK8, CCND1, PARP1, NOS2, CASP3, BCL2, AKT1, MAPK1, PTGS2, TNF, NFKB1, CFTR
Paroxetine CTD 00007180	0.001	44.44	731.81	CASP3, STAT3, PTGS2, TNF, MTOR
Rubitecan CTD 00002935	0.001	44.44	731.81	CDKN1A, CCND1, CASP3, BCL2, BAX
Ac1l1wkq Ctd 00007050	0.001	44.44	731.81	MMP2, IL1B, PTGS2, TNF, MMP9
Oligomycin CTD 00006434	0.001	44.44	731.81	RB1, CCND1, IL1B, PTGS2, TNF
A-443654 Ttd 00001407	0.001	44.44	731.81	SMAD3, IL1B, AKT1, MITF, CFTR
Ciprofloxacin CTD 00005674	0.001	44.44	1417.88	CDKN1A, IL6, TGFB1, PARP1, IFNG, CASP3, IL1B, BCL2, BAX, TNF
Trifluoperazine CTD 00006935	0.001	44.44	1417.88	MAPK8, SMAD3, PARP1, CASP3, BCL2, MAPK1, BAX, PRL, MAPK14, MAPK3
Ly 294002 Ttd 00009057	0.001	44.14	1132.85	MAPK11, MAPK8, AKT1, MAPK1, MAPK14, NFKB1, MTOR, MAPK12
Bisindolylmaleimide Iv TTD 00002467	0.001	44.14	1132.85	PRKCG, MAPK11, MAPK8, PRKCB, AKT1, MAPK1, MAPK14, MAPK12
Alvocidib CTD 00002892	0.001	44.14	2224.73	RB1, CDKN1A, JUN, PARP1, STAT3, MAPK14, VEGFA, MAPK8, CCND1, CDK4, CASP3, BCL2, AKT1, MAPK1, BAX, MAPK3
Parthenolide CTD 00000087	0.001	43.92	1937.34	MITF, TRAF1, PTGS2, TNF, FGF2, MMP9, NFKB1, VEGFA, MAPK8, IL6, CCND1, BCL2, FAS, BAX
Leupeptin CTD 00001574	0.001	43.64	444.23	IL6, AKT1, BAX
Pd 158780 CTD 00003494	0.001	43.64	444.23	RB1, ERBB2, EGFR
Glutaraldehyde CTD 00006033	0.001	43.64	444.23	IL6, PPARG, TNF
Fgin-1-27 Ctd 00002967	0.001	43.64	444.23	CASP3, BCL2, BAX
Arsenic Acid CTD 00001208	0.001	43.64	444.23	MAPK1, EGFR, MAPK3
Razoxane CTD 00006692	0.001	43.64	444.23	JUN, MAPK8, CASP3
Ramipril CTD 00007148	0.001	43.64	444.23	TGFB1, ACE, CFTR
Thiopental CTD 00006876	0.001	43.64	444.23	JUN, CASP3, TNF
Aldehydo-D-Galactose CTD 00006017	0.001	43.64	444.23	CASP3, BCL2, BAX
Cyprodinil CTD 00003503	0.001	43.64	444.23	CASP3, MAPK1, MAPK3
Beclomethasone 17-Monopropionate CTD 00002649	0.001	43.64	444.23	IL6, IL1B, TNF
Vatalanib Succinate TTD 00011775	0.001	43.64	444.23	KDR, PPARG, EGFR
Yc-1 CTD 00003160	0.001	43.64	1249.21	GUCY1A3, GUCY1B3, MAPK8, SMAD3, CASP3, BCL2, BAX, NFKB1, VEGFA
Cadmium Selenide Ctd 00002452	0.001	43.64	1249.21	MAPK8, IL6, TGFB1, IL1B, CASP1, HMOX1, MAPK1, MAPK14, MAPK3
Mevalonic Acid BOSS	0.001	43.64	1651.19	PRDX2, IL6, CASP3, IL1B, BCL2, TNF, HRAS, MMP9, EGFR, IL2, MAPK3, VEGFA
Crizotinib BOSS	0.001	43.64	848.03	ALK, IL6, STAT3, ERBB2, HRAS, EGFR
Ritonavir CTD 00007290	0.001	43.43	2580.99	RB1, CDKN1A, JUN, PARP1, NOS3, STAT3, FOS, TNF, NFKB1, IL6, CCND1, IFNG, CDK4, MYC, CASP3, CASP1, BCL2, HMOX1, PPARG
Butyric Acid CTD 00007353	0.001	43.33	1768.74	CDKN1A, JUN, TGFB1, PTGS2, TNF, ESR2, IL6, MYC, EP300, MAPK1, BAX, PPARG, MAPK3
Dioxidanide CTD 00006819	0.001	43.24	1366.16	TGFB1, NOS3, PRKCB, IL1B, KDR, HMOX1, MAPK1, TNF, HRAS, MAPK3
Metoprolol BOSS	0.001	43.08	964.84	IL6, ACE, CASP3, MMP2, ESR2, MAPK3, VEGFA
Hesperetin CTD 00000678	0.001	43.08	964.84	CDKN1A, CCND1, CDK4, CASP3, BCL2, BAX, PPARG
Deguelin CTD 00003487	0.001	43.01	3355.36	RB1, CDKN1A, CXCR4, BRCA1, PTGS2, TNF, EGFR, CCND1, MYC, CASP3, KDR, AKT1, PARP1, NOS3, STAT3, MITF, MMP9, MTOR, VEGFA, PIK3CA, CDK4, BCL2, SNAI1, CTNNB1, ATM
Salbutamol CTD 00005336	0.001	42.93	1483.6	RB1, IL6, CDK4, IL1B, BCL2, MAPK1, BAX, PTGS2, TNF, FGF2, MAPK3
Pi-103 Ctd 00004750	0.001	42.67	1082.08	PIK3CA, CASP3, BCL2, AKT1, MAPK1, BAX, MTOR, MAPK3
Propanil CTD 00004257	0.001	42.67	562.49	JUN, IL6, TNF, IL2
4-Amino-1,8-Naphthalimide CTD 00003082	0.001	42.67	562.49	PARP1, CASP3, BAX, BRCA1
Rolipram CTD 00007371	0.001	42.67	562.49	IL1B, IL13, TNF, CFTR
Doramapimod TTD 00007708	0.001	42.67	562.49	MAPK11, PPARG, MAPK14, MAPK12
Gallic Acid CTD 00006020	0.001	42.5	2243.66	CDKN1A, MMP2, CXCR4, PTGS2, TNF, MMP9, RHOA, VEGFA, MAPK8, IL6, CASP3, BCL2, AKT1, MAPK1, BAX, ATM, MAPK3
Kn-93 CTD 00002783	0.001	42.11	680.65	RB1, CCND1, IL1B, MAPK1, MAPK3
Heme CTD 00006078	0.001	42.11	680.65	NOS2, IFNG, IL1B, HMOX1, TNF
Ku-55933 Ctd 00004399	0.001	42.11	680.65	CDKN1A, PARP1, CCND1, FAS, ATM
Prostaglandin J2 CTD 00001744	0.001	42.11	680.65	JUN, PARP1, CASP3, EP300, PPARG
Salicylate, Sodium BOSS	0.001	41.74	1554.27	IL6, MYC, CASP3, ERBB2, STAT3, PTEN, PPARG, TNF, HRAS, EGFR, IL2, VEGFA
Clofarabine CTD 00002713	0.001	41.74	798.75	CDKN1A, PARP1, CCND1, MYC, CASP3, ATM
In1541 Ctd 00001481	0.001	41.74	798.75	MMP2, CASP3, PTEN, MMP9, MTOR, EGFR
Geldanamycin CTD 00000033	0.001	41.6	1673.07	PARP1, TNF, EGFR, CCND1, PLAU, CASP3, ERBB2, BCL2, AKT1, MAPK1, CTNNB1, CFTR, MAPK3
Thioacetamide Boss	0.001	41.48	916.87	IL6, CASP3, MMP2, BCL2, HMOX1, TNF, MMP9
Terbutaline CTD 00006840	0.001	41.48	916.87	IFNG, CASP3, IL1B, MAPK1, TNF, NFKB1, MAPK3
Bisindolylmaleimide I TTD 00002466	0.001	41.48	916.87	PRKCG, MAPK11, MAPK8, AKT1, MAPK1, MAPK14, MAPK12
Captopril BOSS	0.001	41.29	1035.06	IL6, ACE, MMP2, BCL2, PPARG, TNF, MMP9, VEGFA
Methoxsalen CTD 00006301	0.001	41.29	1035.06	RB1, PARP1, CASP3, BCL2, BAX, ATM, BRCA1, TNF
Tributyltin CTD 00000610	0.001	41.14	1153.37	MAPK8, JUN, CASP3, CXCR4, MAPK1, PPARG, PTGS2, TNF, MAPK3
Cantharidin CTD 00005569	0.001	41.14	1153.37	SMAD3, BCL2, MAPK1, BAX, MITF, PPARG, NFKB1, MTOR, CFTR
Chitosamine CTD 00006030	0.001	40.93	2756.4	SMAD2, JUN, PARP1, NOS2, MMP2, FOS, PTGS2, MAPK14, TNF, MMP9, NFKB1, VEGFA, MAPK8, IL6, IFNG, CASP3, IL1B, AKT1, HMOX1, MAPK1, PPARG, MAPK3
9,12-Octadecadienoic Acid CTD 00007296	0.001	40.93	1390.5	CREBBP, IL6, IFNG, NOS3, IL1B, PPARG, PTGS2, TNF, MMP9, IL2, MAPK3
Amiloride Ctd 00005369	0.001	40.85	1509.38	PARP1, IFNG, PLAU, CASP3, IL1B, ERBB2, AKT1, MAPK1, FOS, NFKB1, MAPK3, VEGFA
Tanespimycin CTD 00003582	0.001	40.73	1747.84	ALK, RB1, MMP2, MMP9, EGFR, MTOR, CCND1, CDK4, CASP3, ERBB2, BCL2, AKT1, MAPK1, MAPK3
Carbon Monoxide CTD 00005586	0.001	40	754.17	IL6, PTEN, AKT1, HMOX1, MAPK14, TNF
Arsenic(III) Chloride CTD 00002191	0.001	40	754.17	IL6, MAPK8, STAT3, CTNNB1, AKT1, VEGFA
Mitonafide CTD 00000974	0.001	40	754.17	SMAD3, IL1B, CASP3, MAPK1, MITF, MAPK3
Enoxolone CTD 00003674	0.001	40	754.17	PRKCB, PPARG, MMP9, TNF, NFKB1, VEGFA
Hyperforin CTD 00000051	0.001	40	395.89	JUN, MAPK1, MAPK3
Alprenolol CTD 00005359	0.001	40	395.89	MAPK1, EGFR, MAPK3
Dimethyl-IQX CTD 00002023	0.001	40	395.89	CDKN1A, BCL2, BAX
Ammonia CTD 00005384	0.001	40	395.89	NOS2, IL1B, HMOX1
Cordycepin CTD 00002433	0.001	40	395.89	CASP3, BCL2, BAX
Miglitol Ctd 00002031	0.001	40	395.89	IL6, IL1B, TNF
Modrasone CTD 00001031	0.001	40	395.89	IFNG, IL2, VEGFA
Beta-Heparin CTD 00005771	0.001	40	395.89	PTN, FGF2, VEGFA
Bisoprolol Ctd 00007160	0.001	40	395.89	IL6, IL1B, TNF
2,2',4,4'-Tetrachlorobiphenyl Ctd 00001704	0.001	40	395.89	MAPK1, PTGS2, MAPK3
Buprenorphine CTD 00005539	0.001	40	395.89	MAPK1, IL2, MAPK3
Ro-4396686 TTD 00010666	0.001	40	395.89	KDR, MAPK1, EGFR
Streptozotocin Ctd 00006786	0.001	40	872.83	PRDX2, MMP2, IL1B, AKT1, HMOX1, TNF, MMP9
Roscovitine CTD 00003426	0.001	40	872.83	RB1, CDKN1A, CCND1, PARP1, CASP3, BCL2, BAX
Lithium Ctd 00006220	0.001	40	1705.33	PRKCG, PARP1, DUSP1, FOS, VEGFA, CASP3, IL1B, BCL2, AKT1, MAPK1, FAS, BAX, ATM, MAPK3
Nimodipine CTD 00006398	0.001	40	516.02	CASP3, BCL2, BAX, FOS
Chlorobenzene Ctd 00001495	0.001	40	516.02	DUSP1, IL13, HMOX1, PTGS2
Lysophosphatidic Acid CTD 00001576	0.001	40	516.02	AKT1, MAPK1, VEGFA, MAPK3
Ethene CTD 00007378	0.001	40	516.02	IL6, NOTCH1, FOS, TNF
Sodium Chloride CTD 00006751	0.001	40	516.02	CDKN1A, IL6, ACE, IL1B
1,3-Dimethylthiourea Ctd 00001818	0.001	40	516.02	IL6, IL1B, TNF, NFKB1
Thymidine CTD 00006888	0.001	40	516.02	MYC, CASP3, HMOX1, BAX
Fenhexamid CTD 00004037	0.001	40	516.02	CCND1, PTEN, BCL2, ESR2
Canertinib Dihydrochloride TTD 00002663	0.001	40	516.02	ERBB2, AKT1, MTOR, EGFR
141-05-9 Ctd 00000755	0.001	40	991.42	CDKN1A, CCND1, PARP1, CASP3, HMOX1, NUP153, ATM, TNF
Chloroquine CTD 00005645	0.001	40	991.42	CDKN1A, IL6, IL1B, ERBB2, ATM, TNF, EGFR, IL2
Monobenzone BOSS	0.001	40	635.31	IL6, CASP3, BCL2, PPARG, TNF
Hypochlorous Acid Ctd 00006135	0.001	40	635.31	MAPK8, HMOX1, MAPK1, EGFR, MAPK3
Riluzole CTD 00007294	0.001	40	635.31	IL6, PRKCB, CASP3, TNF, VEGFA
Teriflunomide CTD 00002799	0.001	40	635.31	RB1, CDKN1A, AKT1, TNF, NFKB1
Irbesartan CTD 00002968	0.001	40	635.31	RET, TGFB1, IFNG, PPARG, TNF
Veliparib CTD 00004721	0.001	40	635.31	PARP1, BAX, ATM, BRCA1, EGFR
Triamcinolone Acetonide Ctd 00006922	0.001	40	635.31	TGFB1, IL1B, TNF, CFTR, VEGFA
Aminoguanidine CTD 00000144	0.001	40	635.31	NOS2, IL1B, BCL2, BAX, CFTR
Lopinavir CTD 00007472	0.001	40	635.31	RB1, IL6, SMAD3, IL1B, TNF
Trichostatin A Ssmcf7 DOWN	0.001	4.97	28.2	SMAD2, RET, CREBBP, CCND1, MYC
R406 Lincs	0.001	4.95	32.55	ALK, RET, MAPK8, KDR, MAPK12, EGFR
Momelotinib LINCS	0.06	4.92	13.65	MAPK8, CDK4
Papaverine HL60 DOWN	0.06	4.92	13.65	WT1, ATM
Celastrol MCF7 UP	0.001	4.89	36.3	CEBPB, CDKN1A, DUSP1, FAS, HMOX1, FOS, VEGFA
Tamibarotene CTD 00002527	0.001	4.87	79.86	SMAD2, CEBPB, CDKN1A, PRKCB, CXCR4, BRCA1, MAPK14, TNF, VEGFA, IL6, APC, CCND1, MYC, IL1B, BCL2, MAPK1, MAPK3
Lovastatin	0.19	4.85	8.13	AKT1
Sertraline	0.19	4.85	8.13	JUN
Ipa-3 Mrc	0.19	4.85	8.13	MAPK3
Alpha-Hexylcinnamaldehyde CTD 00002937	0.19	4.85	8.13	HMOX1
3-Aminofluoranthene Ctd 00002071	0.19	4.85	8.13	PPARG
Methyl 4-Methoxycinnamate CTD 00002989	0.19	4.85	8.13	PTGS2
Pentetrazol HL60 DOWN	0.07	4.78	12.99	TGFB1, KRAS
Zinc Ctd 00007011	0.001	4.77	230.45	RB1, CDKN1A, PTEN, PRL, TNF, FGF2, ETS1, RAB22A, CCND1, PLAU, MYC, CASP3, TIMP2, AKT1, EP300, PARP1, PRKCB, DUSP1, FOS, MMP9, ETV4, DDB2, IFNG, IL1B, PPARG, CFTR, CXCR4, PTGS2, EGFR, MAPK8, CALD1, HMOX1, MAPK1, MAPK3, JUN, TGFB1, ACE, MAPK12, NFKB1, IL2, VEGFA, IL6, APC, SNAI1, BCL2, FAS, BAX, CTNNB1, ATM
Cadmium Ctd 00005555	0.001	4.76	153.49	CDKN1A, CXCR4, PRL, BRCA1, PTGS2, TNF, FGF2, MAPK8, CCND1, MYC, CASP3, AKT1, HMOX1, MAPK1, MAPK3, JUN, PARP1, NOS2, DUSP1, STAT3, FOS, MAPK14, MMP9, ESR2, VEGFA, IL6, IFNG, IL1B, BCL2, PECAM1, FAS, BAX, KRAS, CFTR
Mg-132 Mcf7 Up	0.001	4.74	38.46	JUN, CEBPB, CDKN1A, NOTCH1, DUSP1, FAS, HMOX1, VEGFA
R406 Kinome Scan	0.001	4.73	30.02	ALK, RET, MAPK8, KDR, MAPK12, EGFR
Parthenolide PC3 UP	0.001	4.73	30.02	CDKN1A, DUSP1, HMOX1, CXCR4, FOS, VEGFA
Cep-701 Kinome Scan	0.001	4.71	37.94	ALK, RET, MAPK8, PIK3CA, CDK4, KDR, MAPK12, EGFR
Chloroxine	0.19	4.71	7.76	TNF
(+)-Isoprenaline PC3 UP	0.19	4.71	7.76	DUSP1
Quercetin MCF7 UP	0.19	4.71	7.76	HMOX1
Terbutaline PC3 UP	0.19	4.71	7.76	DUSP1
Diazinon BOSS	0.19	4.71	7.76	TNF
Diethylstilbestrol BOSS	0.19	4.71	7.76	PRL
Amoxicillin BOSS	0.19	4.71	7.76	IL6
1,2-Benzisothiazol-3(2H)-One CTD 00000812	0.19	4.71	7.76	IL1B
Vanillin CTD 00003324	0.19	4.71	7.76	HMOX1
Kaempferol TTD 00008767	0.19	4.71	7.76	PPARG
Isotretinoin HL60 UP	0.01	4.71	21.43	CEBPB, SMAD3, CPD, PECAM1
Hg-14-10-04 Lincs	0.001	4.71	29.75	ALK, RET, MAPK8, ERBB2, KDR, EGFR
Alprostadil HL60 UP	0.001	4.69	54.04	DUSP1, IL1B, CPD, SNAI1, CASP1, CTNNB1, CXCR4, PPARG, PRL, FOS, PTGS2, VEGFA
8-Hydroxyquinoline Ctd 00007045	0.001	4.69	33.6	CDKN1A, SMAD3, HMOX1, PPARG, FOS, ETV4, EGFR
Arsenite CTD 00000779	0.001	4.68	166.93	CEBPB, NOTCH1, DLX4, PTEN, PTGS2, TNF, CXCL14, EGFR, CCND1, CALD1, CASP3, KDR, AKT1, HMOX1, MAPK1, HES1, MAPK3, CREBBP, JUN, JAG1, PARP1, NOS2, DUSP1, NOS3, MMP2, MAPK14, MMP9, NFKB1, ESR2, IL2, VEGFA, IFNG, WT1, IL1B, BCL2, BAX, CTNNB1, CFTR
Chir-258/Tki-258 Kinome Scan	0.03	4.66	16.86	RET, KDR, EGFR
Bx-912 Lincs	0.001	4.66	29.23	ALK, RET, MAPK8, CDK4, KDR, EGFR
Cicloheximide PC3 UP	0.001	4.66	49.21	JUN, IL6, CEBPB, CDKN1A, JAG1, PLAU, DUSP1, MYC, IL1B, MITF, PTGS2
Cylindrospermopsin CTD 00003136	0.001	4.64	60.82	JUN, CDKN1A, SMAD3, DUSP1, CXCR4, MITF, FOS, TNF, NFKB1, CASP3, NOSTRIN, BCL2, FAS, CFTR
Dipyridamole	0.07	4.64	12.38	ATM, BRCA1
Desipramine PC3 UP	0.07	4.64	12.38	HMOX1, ATM
Glycocholic Acid PC3 DOWN	0.07	4.64	12.38	HMOX1, ATM
Spiperone PC3 DOWN	0.07	4.64	12.38	GUCY1A3, GUCY1B3
Astemizole MCF7 UP	0.001	4.62	24.83	JUN, CEBPB, DUSP1, FOS, VEGFA
Decitabine CTD 00000750	0.001	4.62	232.1	RB1, CDKN1A, PTEN, BRCA1, TNF, CXCL14, ETS1, CCND1, PLAU, MYC, CASP3, AKT1, EP300, HRAS, PARP1, PRKCB, MMP2, MITF, FOS, DYNLL1, MMP9, DDB2, SFRP1, MSH2, IFNG, PPARG, CEBPB, NOTCH1, CXCR4, PTGS2, EGFR, PRDX2, MAPK1, MAPK3, JUN, TGFB1, NOS3, IFNB1, STAT3, FANCC, NFKB1, ESR2, IL2, VEGFA, IL6, APC, SNAI1, BCL2, FAS, BAX, CTNNB1, ATM
A443654 Lincs	0.03	4.62	16.59	RET, AKT1, MAPK12
Phenoxybenzamine PC3 DOWN	0.03	4.62	16.59	PLAU, IL1B, PPARG
Parthenolide PC3 DOWN	0.001	4.6	24.58	GUCY1A3, SCO2, HES1, ATM, PPARG
Sanguinarine HL60 UP	0.001	4.58	47.78	JUN, IL6, DUSP1, IFNB1, CASP1, FAS, HMOX1, MITF, HES1, FOS, PTGS2
Menadione	0.2	4.57	7.42	CFTR
Cp-690334-01 Pc3 Up	0.2	4.57	7.42	CDKN1A
Diflorasone PC3 DOWN	0.2	4.57	7.42	IL1B
Luteolin PC3 UP	0.2	4.57	7.42	ATM
Paracetamol HL60 UP	0.2	4.57	7.42	HPR
Pyrantel HL60 DOWN	0.2	4.57	7.42	TGFB1
Deuterium Hydride BOSS	0.2	4.57	7.42	PRDX2
Beta-D-Glucose 6-Phosphate BOSS	0.2	4.57	7.42	CASP3
Progesterone TTD 00010337	0.2	4.57	7.42	MAPK1
Tyrphostin AG-1478 MCF7 UP	0.03	4.57	16.32	JUN, HES1, VEGFA
Bosutinib FDA	0.01	4.54	20.12	ALK, RET, ERBB2, EGFR
Chlorprothixene PC3 UP	0.07	4.51	11.8	CDKN1A, DUSP1
Cupric Oxide Ctd 00001471	0.001	4.48	45.74	SFRP1, IL6, MYC, CASP3, ERBB2, SNAI1, HMOX1, HES1, FOS, TNF, VEGFA
Diuron CTD 00005864	0.01	4.48	19.62	IL6, IFNG, PTGS2, TNF
R547 Kinome Scan	0.2	4.44	7.1	CDK4
Bas-012416453 Pc3 Down	0.2	4.44	7.1	PLAU
Benzethonium Chloride HL60 DOWN	0.2	4.44	7.1	JUN
Harmol PC3 DOWN	0.2	4.44	7.1	PLAU
Cinnamyl Alcohol CTD 00001006	0.2	4.44	7.1	HMOX1
6-Mercaptopurine Ctd 00007042	0.2	4.44	7.1	NFKB1
Gossypol HL60 UP	0.07	4.44	11.53	IL1B, VEGFA
Paraoxon Ctd 00006470	0.07	4.44	11.53	PPARG, FOS
Digoxin PC3 DOWN	0.01	4.44	23.13	GUCY1A3, SCO2, ATM, PPARG, BRCA1
4-Aminobutyric Acid BOSS	0.01	4.44	23.13	PRDX2, IL6, CASP3, PRL, TNF
(-)-Isoprenaline HL60 DOWN	0.01	4.41	19.15	WT1, MYC, BCL2, MMP9
Cefalotin HL60 UP	0.08	4.38	11.27	CALD1, RAB22A
Zearalenone Ctd 00007008	0.01	4.35	22.23	CASP3, BAX, PPARG, ESR2, CFTR
Progesterone	0.21	4.32	6.81	MAPK1
Ikk Inhibitor Vii Mrc	0.21	4.32	6.81	MAPK8
Bms-387032/Sns-032 Kinome Scan	0.21	4.32	6.81	CDK4
Beclometasone HL60 UP	0.21	4.32	6.81	DUSP1
Cloperastine PC3 DOWN	0.21	4.32	6.81	CCDC88A
Furazolidone HL60 DOWN	0.21	4.32	6.81	PTGS2
Semustine MCF7 UP	0.21	4.32	6.81	HMOX1
Sodium Ctd 00006750	0.21	4.32	6.81	CFTR
Pentabromophenol Ctd 00003276	0.21	4.32	6.81	PPARG
Malathion CTD 00006233	0.21	4.32	6.81	HRAS
Rifabutin MCF7 DOWN	0.03	4.32	14.82	RET, CCND1, NFKB1
3-Methylcholanthrene CTD 00006310	0.001	4.31	32.24	IL6, CDKN1A, MAPK8, PLAU, IL1B, HMOX1, BRCA1, TNF
Vitinoin CTD 00007069	0.001	4.31	77.49	CDKN1A, MMP2, VEGFC, PTGS2, TNF, MMP9, EGFR, RHOA, VEGFA, PRDX2, IL6, CCND1, CALD1, IL1B, CPD, CASP3, BCL2, BAX, PPARG, KRAS, CFTR
Thapsigargin PC3 UP	0.001	4.3	49.14	CEBPB, CDKN1A, JAG1, DUSP1, MITF, PTGS2, FGF2, ETS1, NFKB1, VEGFA, IL6, PLAU, MYC
Buflomedil PC3 UP	0.03	4.29	14.59	DLX4, HPR, CFTR
Etilefrine PC3 UP	0.21	4.21	6.53	DUSP1
Ketoconazole HL60 DOWN	0.21	4.21	6.53	PTGS2
Verteporfin HL60 UP	0.21	4.21	6.53	JUN
Ephedrone CTD 00002112	0.21	4.21	6.53	IFNG
3H-Xanthen-3-One, 2,6,7-Trihydroxy-9-Methyl- TTD 00000850	0.08	4.21	10.53	PPARG, CFTR
67526-95-8 Ctd 00007263	0.001	4.2	87.44	RET, CEBPB, BRCA1, PTGS2, TNF, CCND1, MYC, CASP3, AKT1, COX2, MAPK1, MAPK3, CREBBP, JUN, PARP1, PRKCB, MITF, FOS, ETV4, MTOR, VEGFA, IL6, BCL2, BAX, CFTR
Niclosamide HL60 DOWN	0.001	4.19	27.38	MSH2, PARP1, WT1, CDK4, MYC, BRCA1, DYNLL1
Strophanthidin PC3 UP	0.001	4.18	43.39	CREBBP, JUN, IL6, CEBPB, CDKN1A, DUSP1, EP300, CXCR4, HES1, FOS, PTGS2, NFKB1
Am580 Ctd 00002706	0.04	4.17	13.93	RB1, MAPK1, MAPK3
A-674563 Kinome Scan	0.08	4.16	10.3	RET, AKT1
Hydrogen Peroxide CTD 00006118	0.001	4.13	264.45	RB1, ALK, CDKN1A, PTEN, BRCA1, TNF, FGF2, ETS1, YY1, CASP10, MYC, CASP3, TIMP2, AKT1, NOS1, HRAS, PRKCG, PARP1, DUSP1, MMP2, IL13, FOS, DYNLL1, MMP9, DDB2, MSH2, PIK3CA, IFNG, SCO2, IL1B, PPARG, CFTR, CEBPB, DLX4, CXCR4, PTGS2, EGFR, PRDX2, MAPK8, ERBB2, HMOX1, MAPK1, HES1, MAPK3, SMAD2, JUN, TGFB1, SMAD3, JAG1, ACE, NOS2, NOS3, IFNB1, STAT3, NUP153, MAPK14, NFKB1, VEGFA, CCDC88A, IL6, APC, NOSTR…
Ethosuximide HL60 DOWN	0.01	4.12	20.18	RB1, SMAD2, CREBBP, MSH2, WT1
8-Azaguanine HL60 UP	0.001	4.11	38.85	CREBBP, JUN, CDKN1A, JAG1, DUSP1, IL1B, MITF, PPARG, TRAF1, PTGS2, NFKB1
Mg-262 Mcf7 Up	0.001	4.1	29.37	JUN, CEBPB, CDKN1A, NOTCH1, DUSP1, FAS, HMOX1, VEGFA
Tamoxifen Citrate	0.22	4.1	6.27	IL1B
Bosutinib RBC	0.22	4.1	6.27	EGFR
Benzylpenicillin HL60 DOWN	0.22	4.1	6.27	ATM
Carbamazepine HL60 DOWN	0.22	4.1	6.27	ATM
Pyrantel HL60 UP	0.22	4.1	6.27	CTNNB1
Ac1l1i3y Ctd 00006365	0.22	4.1	6.27	PARP1
4-Hydroxytamoxifen Ttd 00000995	0.22	4.1	6.27	ESR2
Mesalazine MCF7 DOWN	0.09	4.1	10.08	YY1, PTEN
Azd5438 Lincs	0.02	4.1	16.8	MAPK8, PIK3CA, CDK4, MTOR
Puromycin HL60 UP	0.001	4.09	26.08	CREBBP, DUSP1, CASP1, FAS, FOS, MAPK14, PTGS2
Prestwick-983 HL60 DOWN	0.001	4.07	22.78	RET, WT1, CDK4, MYC, BCL2, TNF
Cephaeline PC3 UP	0.001	4.05	43.7	JUN, CEBPB, CDKN1A, JAG1, DUSP1, PTGS2, VEGFA, DDB2, IL6, PLAU, MYC, IL1B, HES1
Tetryzoline HL60 UP	0.04	4.03	13.12	CPD, IL1B, PECAM1
Dinaciclib LINCS	0.22	4	6.02	CDK4
Doxorubicin MCF7 UP	0.22	4	6.02	CXCR4
Propylthiouracil PC3 DOWN	0.22	4	6.02	IL2
Thioacetamide Ctd 00006870	0.22	4	6.02	CDK4
Lycorine MCF7 UP	0.09	4	9.66	JUN, DUSP1
Tanespimycin PC3 UP	0.09	4	9.66	DUSP1, HMOX1
Withaferin A PC3 UP	0.09	4	9.66	DUSP1, HMOX1
Epivincamine HL60 DOWN	0.02	4	16.04	SMAD2, CTNNB1, CXCR4, ATM
DL-Mevalonic Acid CTD 00006329	0.001	39.38	1904.15	PARP1, NOS3, STAT3, PTGS2, TNF, MMP9, RHOA, NFKB1, VEGFA, IL6, IFNG, CASP3, IL1B, BCL2, MAPK1, MAPK3
Deoxycholic Acid Ctd 00005765	0.001	39.34	1784.21	CEBPB, PARP1, PRKCB, PTGS2, TNF, EGFR, NFKB1, PRDX2, NRAS, CASP3, BCL2, HMOX1, MAPK1, HRAS, MAPK3
Cyclohexanecarboxamide, 4-(1-Aminoethyl)-N-4-Pyridinyl-, Trans- CTD 00003513	0.001	39.25	1545.1	CDKN1A, NOS2, MMP2, MAPK14, TNF, MMP9, RHOA, IFNG, IL1B, BCL2, MAPK1, FAS, MAPK3
Embelin Ctd 00000580	0.001	39.18	1425.9	CCND1, PARP1, CASP3, MMP2, KDR, BCL2, SNAI1, AKT1, BAX, PTGS2, MMP9, VEGFA
Flurbiprofen CTD 00005993	0.001	39.11	1306.9	MAPK11, IFNG, IL1B, MAPK1, PPARG, FOS, PTGS2, MAPK14, TNF, MMP9, MAPK3
Chlorophenothane CTD 00005755	0.001	39.11	2589.94	RB1, JUN, CREBBP, NOTCH1, STAT3, FOS, PTGS2, MAPK14, TNF, IL2, NFKB1, ESR2, VEGFA, MAPK8, CCND1, CASP3, ERBB2, BCL2, MAPK1, CTNNB1, CFTR, MAPK3
Calcimycin BOSS	0.001	38.92	1069.39	PRDX2, IL6, CASP3, IL1B, IL13, CASP1, MITF, TNF, MAPK3
Maleic Hydrazide Boss	0.001	38.92	1069.39	IL6, ACE, CASP3, MMP2, BCL2, TNF, MMP9, MTOR, VEGFA
Romidepsin CTD 00003096	0.001	38.92	1069.39	RB1, CDKN1A, PARP1, CASP3, ERBB2, MAPK1, EGFR, NFKB1, MAPK3
Riboflavine CTD 00006698	0.001	38.79	950.81	IL6, PARP1, MYC, IL1B, BCL2, BAX, BRCA1, TNF
Dobutamine CTD 00005866	0.001	38.79	950.81	IL6, NOS2, AKT1, MAPK1, FGF2, EGFR, MAPK3, VEGFA
Salmeterol CTD 00002421	0.001	38.79	950.81	DUSP1, CASP3, BCL2, MAPK1, PPARG, TNF, CFTR, MAPK3
Puerarin CTD 00001616	0.001	38.62	1625.37	NOS2, NOS3, FOS, TNF, ESR2, MAPK8, MYC, CASP3, BCL2, AKT1, MAPK1, BAX, PPARG, MAPK3
Phosphatidylcholines CTD 00006538	0.001	38.62	832.26	CDKN1A, CCND1, CASP3, PTEN, BCL2, BAX, TNF
4,5,6,7-Tetrabromobenzotriazole TTD 00000863	0.001	38.62	832.26	MAPK11, MAPK8, AKT1, MAPK1, MAPK14, NFKB1, MAPK12
Metformin CTD 00006282	0.001	38.55	2308.23	JUN, PRKCB, MMP2, PRL, FOS, TNF, MMP9, VEGFA, IL6, MYC, CASP3, IL1B, BCL2, AKT1, HMOX1, MAPK1, BAX, PPARG, ATM, MAPK3
Aliskiren BOSS	0.001	38.4	713.66	IL6, ACE, CASP3, MMP2, MMP9, MAPK3
Irbesartan BOSS	0.001	38.4	713.66	IL6, ACE, MMP2, STAT3, PPARG, MAPK3
2,2',4,5,5'-Pentachlorobiphenyl Ctd 00000511	0.001	38.4	713.66	CDKN1A, CCND1, PARP1, BCL2, MAPK1, MAPK3
25-Hydroxycholesterol Ctd 00000381	0.001	38.4	713.66	IL6, NOS2, NOS3, IL1B, PPARG, ESR2
Sphingosine 1-Phosphate CTD 00002508	0.001	38.4	713.66	KDR, AKT1, MAPK1, PTGS2, TNF, MAPK3
2-[6-Fluoro-2-Methyl-3-[(4-Methylsulfonylphenyl)Methylidene]Inden-1-Yl]Acetic Acid CTD 00001194	0.001	38.26	1268.23	CDKN1A, MAPK8, CCND1, CASP3, ERBB2, MAPK1, CTNNB1, PPARG, PTGS2, EGFR, MAPK3
Ferriheme Chloride CTD 00006079	0.001	38.26	1268.23	MAPK11, CDKN1A, JUN, MYC, PTEN, AKT1, HMOX1, MAPK1, FOS, MAPK14, MAPK3
Aziridine BOSS	0.001	38.1	1149.63	IL6, CASP3, MMP2, STAT3, BCL2, PPARG, TNF, EGFR, IL2, VEGFA
Dinoprost BOSS	0.001	38.1	1149.63	PRDX2, IL6, CASP3, BCL2, PPARG, PRL, TNF, MMP9, MAPK3, VEGFA
Busulfan CTD 00005543	0.001	38.1	1149.63	CDKN1A, TGFB1, PARP1, MYC, CASP3, MAPK1, ATM, PTGS2, TNF, MAPK3
Bosentan BOSS	0.001	38.1	594.89	IL6, ACE, MMP2, CASP3, TNF
Remifentanil Boss	0.001	38.1	594.89	IL6, CASP3, BCL2, TNF, MAPK3
Axitinib BOSS	0.001	38.1	594.89	KDR, PPARG, MTOR, IL2, VEGFA
Salubrinal CTD 00004410	0.001	38.1	594.89	MAPK8, PARP1, CASP3, BCL2, MAPK14
Potassium Bromate Ctd 00000989	0.001	38.1	594.89	CDKN1A, MAPK1, ATM, BRCA1, MAPK3
Molephantin TTD 00009373	0.001	38.1	594.89	SMAD3, MITF, ATM, TNF, CFTR
Cdk9 Inhibitor Ii Ttd 00002745	0.001	38.1	594.89	CCND1, CDK4, AKT1, MAPK1, MAPK14
Lovastatin CTD 00006225	0.001	37.94	2597.45	RB1, CDKN1A, TGFB1, MMP2, PTEN, PTGS2, MMP9, RHOA, EGFR, NRAS, CCND1, CASP3, BCL2, AKT1, HMOX1, MAPK1, FAS, BAX, CTNNB1, PPARG, KRAS, HRAS, MAPK3
Cantharidin BOSS	0.001	37.89	1031.21	SMAD3, CASP3, BCL2, MAPK1, MITF, PPARG, NFKB1, MTOR, CFTR
Ttnpb Ctd 00001809	0.001	37.89	1031.21	RB1, CCND1, CASP3, BCL2, AKT1, BAX, NFKB1, IL2, CFTR
Usnic Acid CTD 00002807	0.001	37.89	1031.21	DDB1, IL6, NOS2, CASP10, CASP3, IL1B, BCL2, BAX, TNF
N-Nitrosodiethylamine Boss	0.001	37.82	1468.7	MMP2, STAT3, TNF, MMP9, VEGFA, IL6, MYC, CASP3, IL1B, BCL2, HMOX1, CTNNB1, PPARG
Baicalein CTD 00000302	0.001	37.78	1909.57	RB1, NOTCH1, MMP2, PTGS2, MMP9, NFKB1, VEGFA, MAPK8, CCND1, PLAU, CDK4, AKT1, MAPK1, BAX, HES1, CFTR, MAPK3
Aflatoxin G1 Ctd 00001317	0.001	37.65	475.75	PARP1, CASP3, ATM, BRCA1
8-Oh-Dpat Ctd 00007178	0.001	37.65	475.75	IL6, IL1B, AKT1, TNF
Pergolide CTD 00006492	0.001	37.65	475.75	CDKN1A, MSH2, BAX, NFKB1
Bupropion CTD 00007131	0.001	37.65	475.75	MAPK8, CASP3, FOS, MAPK14
Leukotriene D4 CTD 00007224	0.001	37.65	475.75	IL6, TGFB1, FAS, TNF
Heptachlor CTD 00006083	0.001	37.65	912.94	RB1, JUN, MAPK1, CTNNB1, ATM, HRAS, ESR2, MAPK3
Zeranol Ctd 00007009	0.001	37.65	912.94	JAG1, CCND1, NOS2, NOS3, BCL2, MAPK1, BAX, MAPK3
Fluticasone CTD 00002635	0.001	37.65	912.94	IL6, IFNG, DUSP1, CASP3, IL1B, PPARG, TNF, IL2
Sb 203580 Ttd 00010833	0.001	37.65	912.94	MAPK11, MAPK8, AKT1, MAPK1, PTGS2, MAPK14, TNF, MAPK12
Zoledronic Acid BOSS	0.001	37.65	1349.94	IL6, CASP3, MMP2, ERBB2, KDR, BCL2, PPARG, TNF, MMP9, IL2, MAPK3, VEGFA
Clofibrate CTD 00005684	0.001	37.65	1349.94	JUN, CREBBP, TGFB1, IFNG, NOS2, CDK4, MYC, IL1B, PPARG, MMP9, EGFR, MAPK3
Alpha-Neu5Ac BOSS	0.001	37.45	1231.46	PRDX2, IL6, JAG1, CASP3, MMP2, ERBB2, CASP1, TNF, MMP9, EGFR, MAPK3
Cantharidin TTD 00002666	0.001	37.33	794.79	SMAD3, MAPK1, MITF, PPARG, NFKB1, MTOR, CFTR
Celecoxib CTD 00003448	0.001	37.24	2978.05	RB1, CDKN1A, PTGS2, TNF, MAPK8, CCND1, MYC, CASP3, AKT1, MAPK1, MAPK3, JUN, PARP1, MMP2, STAT3, MAPK14, NFKB1, RHOA, VEGFA, IL6, CDK4, IL1B, BCL2, FAS, BAX, CTNNB1, PPARG
Gnf-Pf-4325 Boss	0.001	37.21	1113.24	MAPK8, SMAD3, CASP3, IL1B, MITF, MAPK14, TNF, MTOR, CFTR, MAPK3
Gadodiamide Hydrate CTD 00002623	0.001	37.21	1113.24	IL6, TGFB1, NOS2, IFNG, IL13, AKT1, MAPK1, ATM, MAPK3, VEGFA
3,3'-Dichlorobenzidine Ctd 00007031	0.001	36.92	355.92	CASP3, BCL2, BAX
Diarylpropionitrile CTD 00004308	0.001	36.92	355.92	PTEN, BCL2, ESR2
7-Hydroxycoumarin CTD 00001513	0.001	36.92	355.92	CCND1, BCL2, BAX
Denspm Ctd 00002486	0.001	36.92	355.92	CDKN1A, FAS, NFKB1
Chalcone CTD 00005621	0.001	36.92	355.92	PARP1, MYC, CASP3
Gold Ctd 00006047	0.001	36.92	355.92	PARP1, CASP3, BAX
2,2'-Bipyridine Ctd 00007027	0.001	36.92	355.92	HMOX1, MMP9, VEGFA
Meloxicam CTD 00002644	0.001	36.92	355.92	CASP3, BAX, PTGS2
Imd-0354 Ctd 00004363	0.001	36.92	355.92	HMOX1, TNF, MMP9
Safrole CTD 00006717	0.001	36.92	355.92	CASP3, BCL2, BAX
Thymol Ctd 00006890	0.001	36.92	355.92	CASP3, BCL2, BAX
2-Phenylphenol Ctd 00000139	0.001	36.92	355.92	PPARG, HRAS, ESR2
O,P'-Dde Ctd 00002333	0.001	36.92	355.92	ALK, CREBBP, PTGS2
Dexbudesonide TTD 00007528	0.001	36.92	355.92	IL1B, STAT3, CFTR
Pulmicort Nebuamp Ttd 00010388	0.001	36.92	355.92	IL1B, STAT3, CFTR
Mangiferin CTD 00000713	0.001	36.92	1635.36	CXCR4, PTGS2, TNF, MMP9, NFKB1, VEGFA, IL6, CASP3, BCL2, SNAI1, AKT1, MAPK1, FAS, CTNNB1, MAPK3
Fasudil Hydrochloride BOSS	0.001	36.92	995.27	SMAD2, IL6, CASP3, MMP2, BCL2, TNF, MMP9, CFTR, VEGFA
Nicotinamide CTD 00006391	0.001	36.92	676.71	CDKN1A, IL6, IL1B, BAX, TNF, MTOR
Desipramine CTD 00005772	0.001	36.92	676.71	MAPK8, CASP3, MAPK1, MAPK14, TNF, MAPK3
Hmba CTD 00000732	0.001	36.92	676.71	RB1, CDKN1A, JUN, MYC, BCL2, BAX
Mls000766263 Ctd 00004623	0.001	36.92	676.71	SMAD3, PARP1, CASP3, IL1B, MITF, CFTR
Mangostin CTD 00001026	0.001	36.92	676.71	PARP1, BCL2, AKT1, MAPK1, BAX, MAPK3
Ns-398 CTD 00002958	0.001	36.76	1839	CDKN1A, JUN, ACE, PTGS2, TNF, MMP9, VEGFA, IL6, CCND1, CASP3, IL1B, BCL2, HMOX1, MAPK1, BAX, PPARG, MAPK3
Buthionine Sulfoximine Ctd 00007280	0.001	36.67	1196.45	MAPK8, JUN, CASP3, BCL2, HMOX1, MAPK1, BAX, PTGS2, TNF, MAPK3, VEGFA
Carboplatin CTD 00007106	0.001	36.67	1196.45	CDKN1A, PARP1, MYC, CASP3, ERBB2, BCL2, FAS, BAX, BRCA1, PTGS2, NFKB1
Dinoprostone CTD 00007049	0.001	36.54	3119.79	CXCR4, PRL, PTGS2, TNF, EGFR, MYC, CASP3, AKT1, HMOX1, MAPK1, MAPK3, TGFB1, ACE, PARP1, NOS2, DUSP1, IL13, VEGFC, FOS, MMP9, IL2, VEGFA, IL6, IFNG, WT1, IL1B, BCL2, BAX, CTNNB1
Temozolomide BOSS	0.001	36.46	1924.36	MMP2, STAT3, PTEN, PRL, TNF, MMP9, EGFR, IL2, MTOR, VEGFA, MSH2, MYC, CASP3, KDR, BCL2, PPARG, ATM, MAPK3
Melatonin CTD 00006260	0.001	36.36	1601.4	CDKN1A, TGFB1, NOS3, PTGS2, IL2, MTOR, MAPK8, CCND1, CDK4, CASP3, BCL2, AKT1, HMOX1, BAX, PPARG
Isotretinoin	0.001	36.36	558.65	MAPK1, PPARG, BRCA1, MAPK14, CFTR
Ethane Boss	0.001	36.36	558.65	IL6, CASP3, BCL2, TNF, VEGFA
Isotretinoin BOSS	0.001	36.36	558.65	PPARG, TNF, EGFR, IL2, CFTR
Triamcinolone BOSS	0.001	36.36	558.65	IL6, PPARG, NFKB1, CFTR, VEGFA
Citric Acid CTD 00007282	0.001	36.36	558.65	CDKN1A, CASP3, BCL2, BAX, VEGFA
7-Ketocholesterol Ctd 00000104	0.001	36.36	558.65	IL6, NOS2, CASP3, MAPK1, MAPK3
Sirtinol CTD 00003986	0.001	36.36	558.65	IL1B, CASP3, MAPK1, TNF, MAPK3
Dibutyl Phthalate CTD 00005795	0.001	36.36	1078.75	IL6, CCND1, CDK4, IL1B, AKT1, CTNNB1, PPARG, EGFR, ESR2, CFTR
Plumbagin CTD 00000768	0.001	36.13	760.09	ERBB2, AKT1, HMOX1, MAPK1, MITF, EGFR, MAPK3
Patulin CTD 00006474	0.001	36.13	760.09	JUN, IFNG, IL1B, IL13, MAPK1, PPARG, MAPK3
Indeno[1,2,3-Cd]Pyrene CTD 00001895	0.001	36.13	760.09	JUN, PARP1, MMP2, ERBB2, SNAI1, MAPK14, ETS1
Peptidoglycan CTD 00006490	0.001	36.13	760.09	MAPK8, IL6, IL1B, MAPK1, PTGS2, TNF, MAPK3
U-0126 Ttd 00011614	0.001	36.13	760.09	MAPK11, MAPK8, AKT1, MAPK1, MAPK14, EGFR, MAPK12
Gw9662 Ctd 00004071	0.001	35.86	1365.43	CDKN1A, PTEN, PTGS2, TNF, MMP9, VEGFA, CCND1, CASP3, BCL2, AKT1, HMOX1, BAX, PPARG
Naringenin BOSS	0.001	35.56	844.43	IL6, CASP3, BCL2, HMOX1, PPARG, TNF, MMP9, MTOR
Palmitic Acid CTD 00007272	0.001	35.56	844.43	MAPK8, NOS2, CASP3, BCL2, AKT1, BAX, MAPK14, TNF
Adenosine CTD 00005319	0.001	35.56	844.43	MYC, CASP3, MAPK1, BAX, TNF, CFTR, MAPK3, VEGFA
Ginsenoside Re Ctd 00002168	0.001	35.56	440.56	IFNG, NOS3, FAS, FOS
Seocalcitol CTD 00002914	0.001	35.56	440.56	RB1, CDKN1A, BCL2, BAX
Phentolamine CTD 00006516	0.001	35.56	440.56	CASP3, MAPK1, ESR2, MAPK3
Tylophorine CTD 00000134	0.001	35.56	440.56	CCND1, AKT1, PTGS2, TNF
Mollugin CTD 00002058	0.001	35.56	440.56	PARP1, CASP3, AKT1, PTGS2
Abacavir CTD 00003464	0.001	35.56	440.56	IFNG, IL13, TNF, MMP9
76180-96-6 Ctd 00001374	0.001	35.56	440.56	CDKN1A, BCL2, BAX, PTGS2
Peroxynitrous Acid CTD 00007400	0.001	35.56	440.56	NOS2, NOS3, CASP3, FOS
Mechlorethamine CTD 00006251	0.001	35.56	440.56	CASP3, ERBB2, BCL2, BAX
Yc-1 TTD 00011881	0.001	35.56	440.56	GUCY1A3, GUCY1B3, SMAD3, NFKB1
Dorsomorphin CTD 00004649	0.001	35.56	1046.03	CDKN1A, PARP1, NOS3, CASP3, AKT1, HMOX1, FAS, BAX, ATM, MTOR
L-Cystathionine BOSS	0.001	35.56	642.9	CASP3, BCL2, HMOX1, PPARG, TNF, MAPK3
Aminoguanidine BOSS	0.001	35.56	642.9	IL6, NOS3, CASP3, HMOX1, TNF, VEGFA
Ci-1040 Ctd 00003697	0.001	35.56	642.9	CASP3, PECAM1, MAPK1, PPARG, EGFR, MAPK3
3-Methyladenine CTD 00001217	0.001	35.56	642.9	CDKN1A, PARP1, CASP3, BCL2, AKT1, MTOR
Niflumic Acid CTD 00006396	0.001	35.56	642.9	PARP1, CASP3, BAX, PPARG, PTGS2, CFTR
Dl-Thyroxine Ctd 00006892	0.001	35.56	642.9	CDKN1A, JUN, MAPK1, FOS, PTGS2, MAPK3
Propranolol CTD 00006636	0.001	35.2	1131.27	CASP3, MMP2, IL1B, STAT3, HMOX1, MAPK1, PTGS2, MMP9, EGFR, MAPK3, VEGFA
1-Butanol CTD 00007334	0.001	35.12	929.43	PRKCB, IL1B, AKT1, MAPK1, PRL, PTGS2, IL2, MAPK3, VEGFA
Imatinib CTD 00003267	0.001	35.05	2328.82	RB1, RET, JUN, CEBPB, SMAD3, PTEN, PTGS2, TNF, NFKB1, MTOR, VEGFA, IFNG, CDK4, WT1, CASP3, IL1B, BCL2, AKT1, HMOX1, MAPK1, BAX, PPARG, MAPK3
Anthracene Boss	0.001	35	727.88	IL6, CASP3, MMP2, ERBB2, STAT3, BCL2, TNF
Minocycline CTD 00006338	0.001	35	727.88	MAPK8, JUN, CASP3, MMP2, BCL2, VEGFC, VEGFA
Diallyl Trisulfide CTD 00001934	0.001	34.78	2003.19	CDKN1A, JUN, NOTCH1, NOS2, NOS3, MMP2, PTGS2, TNF, MMP9, VEGFA, CCND1, CASP3, TIMP2, BCL2, AKT1, MAPK1, FAS, BAX, HES1, MAPK3
Phalloidin Boss	0.001	34.78	526.01	IL6, MMP2, CASP3, PPARG, MMP9
Deoxycholic Acid Boss	0.001	34.78	526.01	IL6, MMP2, CASP3, TNF, MAPK3
Lxb4 Boss	0.001	34.78	526.01	IL6, HMOX1, TNF, VEGFA, MAPK3
Linsidomine CTD 00000073	0.001	34.78	526.01	NOS2, CASP3, BCL2, HMOX1, BAX
Erlotinib CTD 00003738	0.001	34.78	1014.95	TGFB1, CCND1, STAT3, BCL2, MAPK1, KRAS, BRCA1, EGFR, MTOR, MAPK3
Vorinostat BOSS	0.001	34.7	1797.68	ACE, STAT3, MITF, TNF, MMP9, EGFR, IL2, MTOR, VEGFA, PRDX2, IL6, MYC, CASP3, ERBB2, BCL2, PPARG, CFTR, MAPK3
Edaravone BOSS	0.001	34.59	813.36	IL6, CASP3, IL1B, BCL2, PPARG, TNF, MMP9, MAPK3
Zinc Sulfide Ctd 00001487	0.001	34.51	1100.88	MAPK8, IL6, TGFB1, IL1B, CASP1, CXCR4, HMOX1, MAPK1, MAPK14, TNF, MAPK3
Mk 886 Ctd 00002517	0.001	34.51	1100.88	RB1, CCND1, PLAU, NOS3, CASP3, BCL2, BAX, CTNNB1, PPARG, TNF, MMP9
Isoproterenol CTD 00006175	0.001	34.43	1680.52	TGFB1, NOS2, TNF, MMP9, EGFR, MTOR, VEGFA, IL6, IFNG, CASP3, IL1B, CASP1, HMOX1, MAPK1, BAX, CFTR, MAPK3
Terfenadine CTD 00007125	0.001	34.29	1187.19	CDKN1A, IL6, CASP3, IL13, BCL2, AKT1, BAX, MITF, TNF, EGFR, IL2, MTOR
Nimustine Ctd 00007067	0.001	34.29	322.38	JUN, FOS, DDB2
5630-53-5 Ctd 00001286	0.001	34.29	322.38	MAPK1, ESR2, MAPK3
11032-49-8 Ctd 00007385	0.001	34.29	322.38	RB1, CDK4, IL1B
Paxilline CTD 00002121	0.001	34.29	322.38	PTEN, AKT1, TNF
Vismodegib CTD 00004909	0.001	34.29	322.38	CASP3, BCL2, FAS
9-(2-Phosphonomethoxypropyl)Adenine CTD 00003259	0.001	34.29	322.38	NOS3, COX2, TNF
Nimesulide TTD 00009677	0.001	34.29	322.38	PPARG, PTGS2, CFTR
124020-07-1 Ctd 00007038	0.001	34.29	899.21	IL6, CASP3, IL1B, STAT3, HMOX1, PPARG, PTGS2, TNF, IL2
Telmisartan CTD 00003021	0.001	34.29	899.21	IL6, CASP3, IL1B, MAPK1, PPARG, PTGS2, MAPK14, TNF, MAPK3
Silver Ctd 00006742	0.001	34.29	1768.18	CDKN1A, JUN, IFNB1, FOS, MAPK14, TNF, NFKB1, MAPK8, IL6, IFNG, CASP3, IL1B, CASP1, BCL2, HMOX1, MAPK1, BAX, MAPK3
Fludarabine CTD 00001135	0.001	34.29	1476.69	CDKN1A, JUN, SMAD3, PARP1, BRCA1, VEGFA, CCND1, MYC, CASP3, BCL2, AKT1, MAPK1, FAS, ATM, MAPK3
Epirubicin CTD 00007057	0.001	34.29	611.84	IL6, CASP3, ERBB2, BCL2, BAX, EGFR
Podophyllotoxin CTD 00006577	0.001	34.29	611.84	PARP1, CASP3, STAT3, MITF, NFKB1, CFTR
Tosylphenylalanyl Chloromethyl Ketone Ctd 00006910	0.001	34.13	1563.97	CDKN1A, TGFB1, PARP1, STAT3, TNF, MMP9, NFKB1, IL6, PLAU, CASP3, IL1B, BCL2, AKT1, HMOX1, CTNNB1, CFTR
T-2 Toxin Ctd 00006824	0.001	34.04	985.39	SMAD3, CASP3, IL1B, TIMP2, BCL2, BAX, MITF, ATM, TNF, CFTR
P-Benzoquinone CTD 00000148	0.001	34.04	985.39	CDKN1A, IL6, JAG1, CASP3, KDR, BCL2, HMOX1, MAPK1, BAX, MAPK3
Mitotane CTD 00006344	0.001	34.04	985.39	CREBBP, NOTCH1, TGFB1, IFNB1, CASP3, BCL2, COX2, BAX, ATM, PTGS2
H-89 CTD 00002586	0.001	33.94	1360.79	CDKN1A, TGFB1, STAT3, FOS, PTGS2, TNF, EGFR, CCND1, AKT1, HMOX1, MAPK1, CTNNB1, CFTR, MAPK3
Silybin CTD 00003999	0.001	33.94	1360.79	CDKN1A, PARP1, MMP2, TNF, MMP9, ESR2, MAPK8, IFNG, PLAU, CASP3, BCL2, HMOX1, BAX, ATM
Phthalic Acid BOSS	0.001	33.94	697.91	IL6, MYC, CASP3, MMP2, BCL2, PPARG, TNF
Pulmicort Nebuamp Boss	0.001	33.94	697.91	IL6, IL1B, STAT3, IL13, TNF, MMP9, CFTR
Phenylephrine CTD 00006521	0.001	33.94	697.91	CDKN1A, TGFB1, ACE, EP300, MAPK1, MMP9, MAPK3
Myricitrin CTD 00000418	0.001	33.94	697.91	MAPK8, NOS3, CASP3, BCL2, MAPK1, BAX, MAPK3
Isoflavone BOSS	0.001	33.88	1739.49	MMP2, PTEN, PRL, TNF, MMP9, EGFR, NFKB1, ESR2, VEGFA, PRDX2, IL6, CASP3, ERBB2, KDR, BCL2, HMOX1, PPARG, MAPK3
5-Nitroso-8-Quinolinol CTD 00004584	0.001	33.68	409.57	RB1, IL1B, MYC, CFTR
Diamide Ctd 00005785	0.001	33.68	409.57	STAT3, HMOX1, MTOR, CFTR
Tetrandrine CTD 00000485	0.001	33.68	409.57	CDKN1A, IL1B, BCL2, MITF
Doxycycline CTD 00005875	0.001	33.68	409.57	MMP2, IL1B, TNF, MMP9
Benazepril CTD 00002009	0.001	33.68	409.57	TGFB1, ACE, TNF, MMP9
Ketamine CTD 00006188	0.001	33.68	409.57	IL6, CASP3, BAX, TNF
P,P'-DDD CTD 00005753	0.001	33.68	409.57	ALK, CREBBP, PTGS2, ESR2
1-(5-Isoquinolinesulfonyl)-2-Methylpiperazine Ctd 00007271	0.001	33.68	409.57	TGFB1, STAT3, FOS, PTGS2
Rh 1 Ctd 00003644	0.001	33.68	409.57	SMAD3, IL1B, MITF, CFTR
Plumbagin TTD 00010275	0.001	33.68	409.57	ERBB2, MAPK1, MITF, EGFR
Spectrum 001666 CTD 00000796	0.001	33.49	1711.57	RB1, CDKN1A, JUN, SMAD3, STAT3, FANCC, FOS, MAPK14, TNF, ESR2, DDB2, MAPK8, CCND1, MSH2, CDK4, AKT1, NOS1, MAPK3
Cetrorelix CTD 00002564	0.001	33.49	870.61	CDKN1A, IL6, TGFB1, CASP3, STAT3, BCL2, MAPK1, MAPK3, VEGFA
1,3,5[10]-Estratriene-3,4,17 Beta-Triol CTD 00000733	0.001	33.49	870.61	CCND1, MYC, AKT1, MAPK1, PTGS2, NFKB1, ESR2, MAPK3, VEGFA
Etoposide	0.001	33.33	496.48	CASP3, MAPK1, ATM, BRCA1, MAPK3
Stavudine CTD 00007231	0.001	33.33	496.48	IL6, IL1B, BCL2, PPARG, TNF
2,6-Dichloroindophenol Ctd 00007030	0.001	33.33	496.48	CDKN1A, NOS2, STAT3, HMOX1, TNF
Chromium(VI) CTD 00002830	0.001	33.23	2544.61	RB1, CXCR4, PTGS2, EGFR, MAPK8, MYC, CASP3, ERBB2, AKT1, HMOX1, COX2, MAPK1, MAPK3, PARP1, STAT3, MAPK14, MMP9, IL2, VEGFA, IL6, MSH2, IFNG, CDK4, SNAI1, BCL2, BAX, CTNNB1
Vinzam BOSS	0.001	33.1	583.24	IL6, IL1B, TNF, MMP9, IL2, MAPK3
Oleanolic Acid Boss	0.001	33.1	583.24	IL6, CASP3, STAT3, BCL2, HMOX1, MTOR
Icn 1229 Ctd 00006697	0.001	33.1	583.24	IFNG, CASP3, IL1B, FAS, TNF, IL2
Glutathione CTD 00006035	0.001	32.94	2608.79	RB1, CDKN1A, PTGS2, TNF, EGFR, MAPK8, CCND1, MYC, CASP3, AKT1, HMOX1, MAPK1, HRAS, MAPK3, PARP1, NOS2, MMP2, IL13, STAT3, MMP9, NFKB1, VEGFA, IL6, IFNG, IL1B, BCL2, BAX, CFTR
Uridine Triphosphate BOSS	0.001	32.94	669.96	PRDX2, IL6, CASP3, BCL2, TNF, EGFR, MAPK3
Benzyl Butyl Phthalate CTD 00001292	0.001	32.94	669.96	CASP3, AKT1, CTNNB1, PPARG, EGFR, ESR2, VEGFA
Poly I-C Ctd 00006579	0.001	32.94	669.96	IL6, IFNG, IFNB1, CASP3, BCL2, BAX, TNF
Chelerythrine CTD 00000834	0.001	32.94	669.96	CASR, IL6, MAPK1, MMP9, NFKB1, CFTR, MAPK3
Suramin CTD 00006822	0.001	32.94	669.96	IL6, CASP3, MAPK1, PTGS2, TNF, FGF2, MAPK3
Geldanamycin BOSS	0.001	32.82	756.7	IL6, CDK4, CASP3, ERBB2, BCL2, TNF, EGFR, MAPK3
Tubocurarine CTD 00006958	0.001	32.82	756.7	CDK4, IL1B, BCL2, MAPK1, FAS, UBE3A, FOS, MAPK3
Pentoxifylline CTD 00006487	0.001	32.82	756.7	MAPK8, PARP1, CASP3, MAPK1, FAS, FOS, TNF, MAPK3
Chlorambucil CTD 00005626	0.001	32.82	756.7	CDKN1A, MYC, CASP3, BCL2, FAS, BAX, FANCC, NFKB1
1,2-Naphthoquinone Ctd 00001871	0.001	32.82	756.7	DUSP1, STAT3, HMOX1, MAPK1, FOS, PTGS2, EGFR, MAPK3
Pentadecane BOSS	0.001	32.77	1569.53	MMP2, STAT3, TNF, MMP9, IL2, NFKB1, MTOR, VEGFA, PRDX2, IL6, MYC, CASP3, IL1B, BCL2, HMOX1, PPARG, MAPK3
Bay 11-7082 CTD 00003959	0.001	32.77	1569.53	CREBBP, PARP1, STAT3, MITF, PTGS2, TNF, NFKB1, MAPK8, IL6, CCND1, IFNG, CASP3, IL1B, ERBB2, BCL2, EP300, HMOX1
Deferoxamine Hydrochloride BOSS	0.001	32.73	843.51	IL6, CASP3, MMP2, BCL2, HMOX1, PPARG, TNF, MAPK3, VEGFA
Sunitinib BOSS	0.001	32.69	1746.57	ALK, NOS3, STAT3, PTEN, VEGFC, MMP9, EGFR, IL2, MTOR, VEGFA, PRDX2, IL6, CASP3, ERBB2, KDR, BCL2, PPARG, HRAS, MAPK3
Cadmium Acetate CTD 00001325	0.001	32.59	1017.48	RB1, CDKN1A, PARP1, IFNG, CASP3, IL1B, BCL2, HMOX1, FAS, BAX, TNF
Sorafenib CTD 00004146	0.001	32.57	2103.77	RB1, RET, JUN, CDKN1A, TGFB1, PARP1, STAT3, MAPK14, MTOR, MAPK8, CCND1, CDK4, MYC, CASP3, KDR, SNAI1, BCL2, AKT1, MAPK1, FAS, BAX, CTNNB1, MAPK3
Chlorpyrifos CTD 00005880	0.001	32.5	1192.09	PARP1, IL13, PTGS2, TNF, IL6, CASP3, IL1B, BCL2, HMOX1, MAPK1, FAS, PPARG, MAPK3
136572-09-3 Boss	0.001	32	1254.42	PTEN, BRCA1, EGFR, IL2, VEGFA, NRAS, MSH2, CASP3, ERBB2, KDR, BCL2, PPARG, HRAS, MAPK3
Hesperidin BOSS	0.001	32	382.1	IL6, CASP3, BCL2, TNF
Letrozole BOSS	0.001	32	382.1	ERBB2, PRL, MTOR, EGFR
Mezerein CTD 00000596	0.001	32	382.1	PRKCG, PARP1, PRKCB, CFTR
Molephantinin TTD 00009374	0.001	32	382.1	SMAD3, IL1B, MITF, CFTR
Flavopiridol Hydrochloride TTD 00008047	0.001	32	382.1	CCND1, CDK4, PPARG, EGFR
Mycophenolic Acid CTD 00006358	0.001	32	904.84	MAPK8, CASP3, BCL2, AKT1, MAPK1, BAX, PPARG, FOS, IL2, MAPK3
Cytochalasin D BOSS	0.001	32	469.64	PRDX2, IL6, CASP3, TNF, MAPK3
Taurocholic Acid Ctd 00006831	0.001	32	469.64	CCND1, MYC, STAT3, BCL2, MAPK3
Edaravone CTD 00000227	0.001	32	469.64	MAPK8, NOS3, IL1B, PPARG, VEGFA
Buthionine Sulfoximine Boss	0.001	32	556.82	PRDX2, CASP3, BCL2, HMOX1, TNF, MAPK3
Oleanolic Acid Ctd 00006433	0.001	32	556.82	CCND1, CASP3, PTEN, MAPK1, TNF, MAPK3
Idocyklin BOSS	0.001	32	1518.55	SMAD2, ACE, MMP2, TNF, MMP9, EGFR, VEGFA, PRDX2, IL6, PLAU, MYC, CASP3, IL1B, KDR, BCL2, PPARG, MAPK3
Endosulfan CTD 00005896	0.001	32	1079.31	JUN, CCND1, CASP3, STAT3, BCL2, SNAI1, MAPK1, CTNNB1, MAPK14, NFKB1, ESR2, MAPK3
Tauroursodeoxycholic Acid CTD 00001524	0.001	32	643.84	JUN, PARP1, CASP3, BCL2, BAX, FOS, MTOR
Oxozinc CTD 00007012	0.001	32	643.84	JUN, CASP3, AKT1, HMOX1, MAPK1, MMP9, MAPK3
Carvedilol CTD 00001961	0.001	32	1166.78	TGFB1, ACE, MMP2, TNF, MMP9, EGFR, IFNG, CASP3, IL1B, HMOX1, MAPK1, FAS, MAPK3
Glycitein CTD 00003084	0.001	32	730.8	CDKN1A, JUN, CCND1, CDK4, MAPK1, MMP9, ESR2, MAPK3
49843-98-3 Ctd 00005030	0.001	32	293.9	PARP1, IL1B, CASP3
Zineb Ctd 00000447	0.001	32	293.9	CASP3, TNF, NFKB1
Acetochlor CTD 00001969	0.001	32	293.9	IL1B, MITF, PPARG
Dibenzoylmethane CTD 00002537	0.001	32	293.9	MYC, BCL2, HRAS
Povpc Ctd 00003737	0.001	32	293.9	IL1B, PTGS2, TNF
Naringin CTD 00000212	0.001	32	293.9	CASP3, FAS, BAX
Dl-Menthol CTD 00006264	0.001	32	293.9	MAPK8, CASP3, RHOA
Cyfluthrin Ctd 00002242	0.001	32	293.9	IL6, MAPK1, MAPK3
Pilocarpine CTD 00006560	0.001	32	293.9	MAPK8, IL1B, CASP3
Benzo[E]Pyrene CTD 00001247	0.001	32	293.9	CASP3, PPARG, TNF
Pindolol CTD 00006562	0.001	32	293.9	MAPK1, PRL, MAPK3
Oxindole I TTD 00009978	0.001	32	293.9	RET, KDR, AKT1
Fisetin CTD 00000919	0.001	31.43	967.59	CDKN1A, IL6, PARP1, CASP3, IL1B, IL13, HMOX1, MAPK1, TNF, MMP9, MAPK3
Verapamil Ctd 00006985	0.001	31.37	880.42	RET, IL6, PARP1, CASP3, BCL2, MAPK1, PRL, FOS, TNF, MAPK3
Pravastatin Sodium Boss	0.001	31.22	706.37	IL6, ACE, CASP3, HMOX1, TNF, MMP9, MAPK3, VEGFA
Fluoranthene Ctd 00000365	0.001	31.22	706.37	CDKN1A, IL6, TGFB1, PARP1, IFNG, NOS3, BAX, TNF
Equol CTD 00007470	0.001	31.22	706.37	NOS3, CASP3, AKT1, MAPK1, PTGS2, EGFR, ESR2, MAPK3
Candesartan BOSS	0.001	31.11	619.39	IL6, ACE, PPARG, TNF, MMP9, MAPK3, VEGFA
Acrolein Boss	0.001	31.11	619.39	IL6, CASP3, BCL2, HMOX1, TNF, MAPK3, VEGFA
Calcium Folinate BOSS	0.001	31.11	619.39	NRAS, IL6, MSH2, PPARG, HRAS, EGFR, VEGFA
Pd 98059 Ttd 00010070	0.001	31.11	619.39	MAPK11, MAPK8, AKT1, MAPK1, MAPK14, MAPK12, MAPK3
Staurosporine BOSS	0.001	31.04	1118.76	MITF, TNF, EGFR, NFKB1, VEGFA, PRDX2, IL6, PLAU, CASP3, BCL2, BAX, HRAS, MAPK3
Thalidomide BOSS	0.001	31.04	1118.76	STAT3, TNF, IL2, NFKB1, MTOR, VEGFA, IL6, IFNG, CASP3, IL1B, BCL2, PPARG, CFTR
Dopamine CTD 00005870	0.001	30.97	1031.37	JUN, PARP1, CASP3, BCL2, HMOX1, MAPK1, BAX, PRL, FOS, TNF, MTOR, MAPK3
Silibinin BOSS	0.001	30.84	1358.99	MMP2, TNF, MMP9, EGFR, IL2, NFKB1, VEGFA, PRDX2, IL6, IFNG, CASP3, IL1B, BCL2, HMOX1, PPARG, MAPK3
Celecoxib BOSS	0.001	30.83	1778.98	MMP2, STAT3, PTEN, VEGFC, TNF, MMP9, IL2, EGFR, VEGFA, PRDX2, IL6, IFNG, MYC, CASP3, IL1B, ERBB2, KDR, BCL2, HMOX1, PPARG, MAPK3
Olmesartan BOSS	0.001	30.77	445.16	IL6, ACE, MMP2, PPARG, MAPK3
Aristolochic Acid CTD 00000005	0.001	30.77	445.16	CASP3, IL1B, MAPK1, MAPK3, VEGFA
Ipriflavone CTD 00000966	0.001	30.77	445.16	CASP3, CASP1, MAPK1, NFKB1, ESR2
Thalidomide CTD 00006858	0.001	30.64	2273.06	PTEN, PTGS2, TNF, FGF2, CCND1, CASP3, KDR, AKT1, MAPK1, MAPK3, JUN, TGFB1, PARP1, DUSP1, MMP2, STAT3, FOS, MAPK14, MMP9, NFKB1, VEGFA, IL6, IFNG, IL1B, BCL2, FAS, CFTR
Cardidigin CTD 00005822	0.001	30.64	770.13	CDKN1A, SMAD3, NOS3, CASP3, IL1B, STAT3, MAPK1, NFKB1, MAPK3
172889-27-9 Boss	0.001	30.48	1336.52	SMAD2, MMP2, STAT3, VEGFC, MMP9, EGFR, IL2, VEGFA, PRDX2, IL6, CASP3, IL1B, ERBB2, KDR, PPARG, MAPK3
Teprotide Boss	0.001	30.48	357.62	ACE, MMP2, TNF, VEGFA
Formoterol CTD 00000665	0.001	30.48	357.62	BCL2, MAPK1, FGF2, MAPK3
Loperamide CTD 00006224	0.001	30.48	357.62	MAPK1, MTOR, IL2, MAPK3
Chlorothalonil Ctd 00000251	0.001	30.48	357.62	SMAD3, ERBB2, MAPK1, PPARG
Etodolac CTD 00007163	0.001	30.48	357.62	CASP3, BCL2, CXCR4, PTGS2
Dihydrocapsaicin CTD 00000675	0.001	30.48	357.62	CDKN1A, CASP3, MAPK1, MAPK3
Acetate TTD 00001564	0.001	30.48	357.62	ACE, NOS3, NOS1, ESR2
ACMC-20mvek CTD 00002629	0.001	30.4	1578.97	RB1, JUN, CDKN1A, PARP1, NOS3, MAPK14, TNF, MMP9, RHOA, IL6, PLAU, CASP3, IL1B, BCL2, AKT1, HMOX1, MAPK1, BAX, MAPK3
Morphine CTD 00006352	0.001	30.38	1248.77	CDKN1A, JUN, FOS, TNF, FGF2, IL2, DDB2, IL6, CASP3, BCL2, AKT1, MAPK1, FAS, BAX, MAPK3
Nocodazole CTD 00007087	0.001	30.34	921.65	MAPK8, JUN, CREBBP, PARP1, CASP3, BCL2, MAPK1, PPARG, CFTR, MAPK3, VEGFA
Tacrolimus Monohydrate Ctd 00007118	0.001	30.34	921.65	TGFB1, IFNG, NOS2, NOS3, CASP3, SNAI1, FAS, PPARG, PTGS2, TNF, IL2
Cobalt Boss	0.001	30.27	596.46	IL6, CASP3, BCL2, HMOX1, PPARG, TNF, VEGFA
O-Phospho-L-Tyrosine BOSS	0.001	30.19	834.75	PRDX2, IL6, ERBB2, STAT3, KDR, PPARG, TNF, EGFR, IL2, MAPK3
Benz[A]Anthracene CTD 00001470	0.001	30.14	1073.96	CDKN1A, JUN, TGFB1, PARP1, MMP2, PTGS2, MAPK14, TNF, ETS1, IL6, IL1B, ERBB2, SNAI1
Acetoacetic Acid BOSS	0.001	30.12	1314.67	IL13, STAT3, TNF, MMP9, IL2, NFKB1, VEGFA, PRDX2, MAPK8, IL6, IFNG, CASP3, BCL2, HMOX1, PPARG, MAPK3
1,9-Pyrazoloanthrone Ctd 00003948	0.001	30.06	2803.62	RB1, CEBPB, CDKN1A, PTEN, PTGS2, TNF, FGF2, EGFR, MAPK8, CCND1, PLAU, MYC, CASP3, AKT1, HMOX1, MAPK1, MAPK3, JUN, TGFB1, PARP1, NOS2, MMP2, STAT3, FOS, MAPK14, MMP9, NFKB1, VEGFA, IL6, IFNG, IL1B, BCL2, FAS, BAX
Carbon Tetrachloride Boss	0.001	30	1227.09	SMAD2, MMP2, STAT3, TNF, MMP9, VEGFA, IL6, IFNG, CASP3, IL1B, KDR, BCL2, HMOX1, PPARG, MAPK3
Zebularine CTD 00000459	0.001	30	748.01	RB1, CDKN1A, CCND1, PARP1, CASP3, BCL2, MAPK1, BAX, MAPK3
Geneticin CTD 00000560	0.001	30	269.43	CASP3, ATM, CFTR
Isoorientin CTD 00002423	0.001	30	269.43	AKT1, MAPK1, MAPK3
Isorhamnetin CTD 00002092	0.001	30	269.43	NOS3, HMOX1, ESR2
Trifluridine CTD 00006938	0.001	30	269.43	PARP1, CASP3, NFKB1
Trequinsin CTD 00001702	0.001	30	269.43	MAPK1, NFKB1, CFTR
Pyrene Ctd 00001472	0.001	30	269.43	PARP1, IFNG, TNF
Nefazodone CTD 00002219	0.001	30	269.43	IFNG, CASP3, TNF
Benzo[A]Pyrene-3,6-Dione CTD 00000927	0.001	30	269.43	STAT3, HRAS, EGFR
Dydrogesterone CTD 00005882	0.001	30	269.43	IL6, IFNG, TNF
4-Hydroperoxycyclofosfamide Ctd 00000594	0.001	30	269.43	CDKN1A, CASP3, BAX
73151-67-4 Ctd 00006204	0.001	30	269.43	IL1B, AKT1, BAX
Amodiaquine CTD 00005388	0.001	30	269.43	RB1, CDKN1A, CCND1
B-Octylglucoside Ttd 00002290	0.001	30	269.43	NOS2, PTGS2, MAPK14
Tretinoin HL60 UP	0.001	3.98	21.9	CEBPB, SMAD3, PRKCB, CPD, PECAM1, CXCR4
Valproic Acid MCF7 DOWN	0.04	3.97	12.74	CREBBP, CCND1, MYC
Puromycin MCF7 UP	0.001	3.97	21.73	JUN, CEBPB, DUSP1, MYC, TNF, VEGFA
Proscillaridin HL60 UP	0.001	3.96	27.48	YY1, NRAS, DUSP1, CASP1, EP300, FOS, PTGS2, RAB22A
Helveticoside PC3 UP	0.001	3.95	27.32	JUN, IL6, CDKN1A, JAG1, DUSP1, FOS, PTGS2, VEGFA
Uranium Acetate CTD 00000229	0.001	3.95	21.56	PRDX2, MSH2, APC, CASP3, BAX, RHOA
Tert-Butyl Hydroperoxide Ctd 00007349	0.001	3.94	102.19	RB1, CEBPB, CDKN1A, PTEN, CXCR4, PTGS2, ETS1, RAB22A, PRDX2, CASP3, ERBB2, HMOX1, MAPK1, HES1, MAPK3, JUN, TGFB1, DUSP1, VEGFC, MITF, FOS, MAPK14, DYNLL1, NFKB1, VEGFA, DDB2, IL6, IL1B, BCL2, FAS, BAX, CTNNB1, PPARG
Menadione CTD 00007386	0.001	3.93	85.87	RB1, CDKN1A, TNF, MAPK8, CCND1, MYC, CASP3, TIMP2, HMOX1, MAPK1, HES1, MAPK3, JUN, SMAD3, JAG1, PARP1, NOS2, DUSP1, FOS, NFKB1, IL6, MSH2, CDK4, NOSTRIN, SNAI1, BCL2, FAS, CFTR
(17S)-17-Hydroxy-13,17-Dimethyl-1,2,6,7,8,14,15,16-Octahydrocyclopenta[A]Phenanthren-3-One CTD 00007088	0.001	3.92	29.79	CREBBP, IL6, MMP2, PTEN, AKT1, CTNNB1, CXCR4, ATM, BRCA1
0179445-0000 Mcf7 Up	0.01	3.92	18.39	JUN, CDKN1A, FAS, RAB22A, VEGFA
Anisomycin PC3 UP	0.001	3.92	67.02	CREBBP, JUN, CEBPB, CDKN1A, JAG1, DUSP1, CXCR4, MITF, TRAF1, FOS, PTGS2, FGF2, ETS1, EGFR, NFKB1, IL6, PLAU, MYC, IL1B, HMOX1, EP300, HES1
Mln8054 Lincs	0.23	3.9	5.79	PIK3CA
F0447-0125 Pc3 Up	0.23	3.9	5.79	HMOX1
Ly-294002 Pc3 Down	0.23	3.9	5.79	WT1
Alvespimycin HL60 UP	0.23	3.9	5.79	CASP1
Furazolidone HL60 UP	0.23	3.9	5.79	CXCL14
Hycanthone MCF7 DOWN	0.23	3.9	5.79	MYC
Chlorhexidine CTD 00005633	0.23	3.9	5.79	IL1B
Dihydroergocristine HL60 UP	0.09	3.9	9.26	CPD, CXCR4
Gabexate PC3 UP	0.09	3.9	9.26	TGFB1, CXCL14
Ebselen BOSS	0.09	3.9	9.26	CASP3, IL1B
Testosterone CTD 00006844	0.001	3.85	88.33	CXCR4, PRL, BRCA1, TNF, EGFR, MYC, CASP3, AKT1, HMOX1, MAPK1, HES1, NOS1, MAPK3, CREBBP, NOS2, DUSP1, NOS3, FANCC, FOS, ESR2, DDB2, MAPK11, IL6, IL1B, CPD, BCL2, BAX, CTNNB1, PPARG, RLN1
Plx-4720 Lincs	0.23	3.81	5.57	ALK
BX-517 Analog (Compound 7b) MRC	0.23	3.81	5.57	MAPK3
Stock1n-35215 Mcf7 Down	0.23	3.81	5.57	RET
Clenbuterol PC3 UP	0.23	3.81	5.57	DUSP1
Monorden HL60 UP	0.23	3.81	5.57	CASP1
Resveratrol PC3 DOWN	0.23	3.81	5.57	IL1B
Phosphoenolpyruvate BOSS	0.23	3.81	5.57	IL6
Fenoterol HL60 UP	0.1	3.81	8.88	CPD, PECAM1
Menadione HL60 DOWN	0.1	3.81	8.88	MYC, BCL2
Staurosporine MCF7 UP	0.1	3.81	8.88	RET, DUSP1
Piroxicam CTD 00006571	0.001	3.79	38.33	RB1, CEBPB, CDKN1A, DUSP1, STAT3, PTGS2, TNF, FGF2, EGFR, VEGFA, DDB2, MSH2, CCND1
Methylergometrine HL60 DOWN	0.02	3.79	14.51	WT1, CDK4, MYC, BCL2
Azd7762 Lincs	0.01	3.78	19.82	ALK, RET, ERBB2, KDR, AKT1, EGFR
Calcitriol CTD 00005558	0.001	3.76	133.54	RB1, RET, CEBPB, CDKN1A, CXCR4, BRCA1, PTGS2, TNF, CXCL14, EGFR, MAPK8, CCND1, MYC, CASP3, CASP1, TIMP2, AKT1, HMOX1, MAPK1, HES1, MAPK3, JUN, TGFB1, DUSP1, MMP2, MITF, NUP153, FANCC, FOS, MAPK14, IL2, VEGFA, DDB2, MAPK11, IL6, PIK3CA, IFNG, CDK4, IL1B, CPD, BCL2, FAS, BAX, CTNNB1, ATM, RLN1
Carmustine PC3 UP	0.02	3.74	14.2	JUN, BAX, HMOX1, ATM
5182598 Mcf7 Up	0.24	3.72	5.36	HMOX1
Benzethonium Chloride MCF7 UP	0.24	3.72	5.36	VEGFA
Monensin MCF7 UP	0.24	3.72	5.36	VEGFA
Gsk1059615 Lincs	0.1	3.72	8.53	PIK3CA, MTOR
Sunitinib	0.01	3.72	19.23	ALK, RET, CDK4, NOS3, KDR, EGFR
Helveticoside HL60 UP	0.001	3.72	21.78	NRAS, IL1B, CASP1, EP300, PPARG, FOS, PTGS2
Strophanthidin HL60 UP	0.001	3.72	24.31	NRAS, DUSP1, IL1B, CPD, CASP1, EP300, FOS, PTGS2
Oxazolone CTD 00006449	0.05	3.69	11.2	IL6, MYC, CXCR4
Cianidanol CTD 00005600	0.001	3.68	53.75	NOTCH1, DUSP1, PTGS2, TNF, IL2, CCND1, PLAU, CASP10, IL1B, CASP3, SNAI1, BCL2, PECAM1, FAS, BAX, AKT1, HMOX1, MAPK1, ATM, MAPK3
Deptropine HL60 DOWN	0.001	3.68	28.69	YY1, NRAS, PLAU, CPD, PECAM1, CASP1, CXCR4, MAPK1, MAPK14, VEGFA
Progesterone CTD 00006624	0.001	3.68	121.22	CDKN1A, DLX4, CXCR4, PRL, PTN, PTGS2, TNF, CXCL14, FGF2, EGFR, MIR335, CCND1, PLAU, MYC, CASP3, KDR, AKT1, HMOX1, MAPK1, HES1, MAPK3, SMAD2, TGFB1, SMAD3, NOS2, DUSP1, NOS3, MMP2, STAT3, MITF, FOS, MMP9, NFKB1, ESR2, IL2, MTOR, VEGFA, IL6, IFNG, WT1, IL1B, BCL2, PECAM1, CFTR
Mevalolactone HL60 UP	0.24	3.64	5.17	IL2
Securinine HL60 UP	0.24	3.64	5.17	HMOX1
Luteolin TTD 00009051	0.24	3.64	5.17	CFTR
Baicalein TTD 00002293	0.24	3.64	5.17	TNF
Copper Ctd 00005706	0.001	3.6	98.73	RB1, CEBPB, CDKN1A, PTEN, PRL, TNF, ETS1, EGFR, PRDX2, MAPK8, CCND1, MYC, CASP3, AKT1, HMOX1, MAPK1, NOS1, HRAS, MAPK3, GUCY1A3, JUN, PARP1, NOS2, DUSP1, MMP2, STAT3, FOS, ETV4, MAPK12, NFKB1, VEGFA, IL6, MSH2, WT1, SCO2, IL1B, BCL2, BAX
Pergolide HL60 UP	0.001	3.59	20.3	CDKN1A, PRKCB, CPD, PECAM1, CASP1, PTGS2, DDB2
Parthenolide MCF7 UP	0.01	3.59	15.54	CEBPB, CDKN1A, DUSP1, HMOX1, VEGFA
5707885 Pc3 Up	0.25	3.56	4.99	CEBPB
Fenoterol PC3 UP	0.25	3.56	4.99	DUSP1
Ionomycin MCF7 UP	0.25	3.56	4.99	VEGFA
Metoprolol HL60 UP	0.25	3.56	4.99	IL2
Promethazine PC3 DOWN	0.25	3.56	4.99	HES1
Semustine PC3 UP	0.25	3.56	4.99	HMOX1
Harmine MCF7 UP	0.11	3.56	7.88	CDKN1A, FAS
Mg-262 Pc3 Down	0.001	3.56	22.22	GUCY1A3, SMAD3, CCND1, SCO2, PLAU, PECAM1, HES1, PPARG
Parthenolide HL60 DOWN	0.03	3.54	12.77	WT1, MYC, BCL2, TNF
Helveticoside PC3 DOWN	0.11	3.52	7.73	SCO2, WT1
(-)-Isoprenaline HL60 UP	0.03	3.52	12.64	DUSP1, CPD, PECAM1, CASP1
Cytarabine CTD 00005743	0.001	3.5	32.63	GUCY1A3, JUN, CDKN1A, PARP1, PTEN, CXCR4, PRL, TNF, SFRP1, IL6, CASP3, BCL2, BAX
(-)-Epigallocatechin Gallate CTD 00002033	0.001	3.48	113.59	RB1, CDKN1A, BRCA1, PTGS2, TNF, FGF2, ETS1, EGFR, MAPK8, CCND1, PLAU, MYC, CASP3, ERBB2, KDR, CASP1, AKT1, HMOX1, MAPK1, HES1, MAPK3, JUN, SMAD3, JAG1, PARP1, NOS2, NOS3, STAT3, MITF, FANCC, FOS, MAPK14, NFKB1, ESR2, IL2, VEGFA, IL6, MSH2, CDK4, IL1B, SNAI1, BCL2, PECAM1, BAX, CTNNB1, PPARG
Puromycin PC3 UP	0.001	3.48	29.99	JUN, IL6, CEBPB, CDKN1A, JAG1, NOTCH1, APC, DUSP1, MYC, MITF, PTGS2, FGF2
Colchicine SKMEL5 UP	0.25	3.48	4.81	JUN
Geldanamycin PC3 UP	0.25	3.48	4.81	DUSP1
Sunitinib Kinome Scan	0.03	3.46	12.26	ALK, RET, KDR, EGFR
Daunorubicin MCF7 UP	0.02	3.45	14.4	CDKN1A, JAG1, NOTCH1, TIMP2, FAS
Nocodazole HL60 UP	0.001	3.43	20.69	RB1, CDKN1A, IL1B, EP300, ATM, KRAS, FOS, PTGS2
Torcetrapib CTD 00004291	0.001	3.43	18.5	CCDC88A, JUN, CALD1, DUSP1, NOS3, MITF, FOS
Sunitinib FDA	0.03	3.42	12.01	ALK, RET, KDR, EGFR
Clozapine	0.26	3.4	4.65	PPARG
1,4-Chrysenequinone HL60 UP	0.26	3.4	4.65	HMOX1
Betulinic Acid HL60 DOWN	0.26	3.4	4.65	CXCR4
Suloctidil HL60 UP	0.06	3.4	9.66	IFNB1, CASP1, HMOX1
Disodium Selenite CTD 00007229	0.001	3.39	65.09	CDKN1A, BRCA1, TNF, YY1, MAPK8, CCND1, CASP10, MYC, CASP3, AKT1, EP300, MAPK1, NOS1, MAPK3, GUCY1A3, JUN, TGFB1, SMAD3, PARP1, VEGFC, FOS, MAPK12, ESR2, VEGFA, IL6, APC, CDK4, IL1B, BAX
Bms-536924,Kin001-126 Lincs	0.06	3.38	9.53	ALK, RET, EGFR
Dorzolamide HL60 DOWN	0.02	3.36	13.71	PECAM1, BAX, ATM, MAPK14, VEGFA
R-Atenolol PC3 DOWN	0.06	3.36	9.41	NRAS, CPD, MAPK14
Vincristine CTD 00006988	0.001	3.34	56.61	CEBPB, CDKN1A, BRCA1, TNF, CALD1, MYC, ERBB2, CASP1, AKT1, HMOX1, HRAS, SMAD2, CREBBP, JUN, SMAD3, PARP1, DUSP1, NUP153, TRAF1, IL6, IFNG, SCO2, BCL2, FAS, BAX, CTNNB1
Ms-275 Pc3 Up	0.001	3.34	21.59	GUCY1B3, CEBPB, CDKN1A, JAG1, DUSP1, IL1B, CXCR4, HES1, PTGS2
Irinotecan MCF7 UP	0.001	3.34	31.53	JUN, CDKN1A, JAG1, NOTCH1, DUSP1, MMP9, RAB22A, VEGFA, PRDX2, SCO2, PLAU, BAX, HMOX1, HRAS
Gsk-690693 Kinome Scan	0.26	3.33	4.49	AKT1
Ceforanide PC3 DOWN	0.26	3.33	4.49	ATM
Mepacrine HL60 DOWN	0.26	3.33	4.49	MYC
Syrosingopine MCF7 UP	0.26	3.33	4.49	VEGFA
Bithionol TTD 00002475	0.26	3.33	4.49	ESR2
2-Naphthalenamine Ctd 00007026	0.12	3.33	7.04	NOS2, BRCA1
Cefadroxil HL60 DOWN	0.06	3.33	9.29	BAX, CXCR4, VEGFA
Ouabain PC3 DOWN	0.06	3.33	9.29	WT1, SCO2, PPARG
Puromycin HL60 DOWN	0.02	3.33	13.48	WT1, SCO2, MYC, BCL2, TNF
Digitoxigenin PC3 UP	0.001	3.31	23.17	JUN, IL6, CEBPB, CDKN1A, DLX4, DUSP1, CASP1, PTEN, HES1, FOS
Digoxin PC3 UP	0.001	3.31	23.17	JUN, IL6, CDKN1A, JAG1, DUSP1, EP300, CXCR4, FOS, PTGS2, FGF2
Piperlongumine HL60 DOWN	0.001	3.29	19	SMAD2, CEBPB, MSH2, WT1, MYC, PECAM1, CXCR4, TNF
Su-14813 Kinome Scan	0.06	3.29	9.05	ALK, RET, KDR
Medrysone HL60 UP	0.01	3.28	17	CALD1, PECAM1, HPR, PTN, CXCL14, EGFR, IL2
Ly-333531 Kinome Scan	0.26	3.27	4.34	CDK4
Staurosporine, N-Benzoyl- RBC	0.26	3.27	4.34	PRKCB
Progesterone HL60 DOWN	0.26	3.27	4.34	JUN
Toluene BOSS	0.26	3.27	4.34	CASP3
Bithionol CTD 00005516	0.26	3.27	4.34	ESR2
Crizotinib	0.06	3.27	8.94	ALK, RET, EGFR
Quinpirole HL60 DOWN	0.02	3.27	12.95	WT1, MYC, BCL2, TNF, MAPK12
Quinpirole HL60 UP	0.02	3.27	12.95	DUSP1, IL1B, CPD, PECAM1, PRL
Uranium Ctd 00006964	0.02	3.25	12.84	PRDX2, MSH2, APC, FOS, RHOA
Fulvestrant MCF7 DOWN	0.04	3.25	10.87	RET, CCND1, MYC, KRAS
Lomustine PC3 UP	0.07	3.22	8.72	CDKN1A, DUSP1, HMOX1
Bosutinib	0.04	3.22	10.66	ALK, RET, ERBB2, EGFR
Metformin Hydrochloride	0.27	3.2	4.2	MTOR
Pnu-0293363 Mcf7 Down	0.27	3.2	4.2	BAX
Monorden MCF7 UP	0.27	3.2	4.2	HMOX1
Oxytetracycline CTD 00006459	0.27	3.2	4.2	VEGFA
Elesclomol CTD 00004602	0.27	3.2	4.2	HMOX1
Tyrphostin AG 538 TTD 00011608	0.27	3.2	4.2	EGFR
Thioguanosine MCF7 DOWN	0.07	3.2	8.61	RET, MSH2, BRCA1
Levonorgestrel HL60 DOWN	0.01	3.2	14.29	YY1, NRAS, CPD, BAX, MAPK14, RAB22A
Zuclopenthixol PC3 UP	0.01	3.19	14.19	DLX4, CASP1, PTEN, HPR, CFTR, IL2
Selenium Ctd 00006731	0.001	3.18	60.72	CDKN1A, CXCR4, TNF, EGFR, CCND1, CALD1, MYC, ERBB2, TIMP2, AKT1, HMOX1, MAPK1, HES1, HRAS, MAPK3, CREBBP, PARP1, PRKCB, MMP2, STAT3, MMP9, MAPK11, IL6, APC, SCO2, CDK4, IL1B, CPD, BCL2, FAS, BAX
Vitamin E Ctd 00006994	0.001	3.18	58.59	CEBPB, UBE3A, TNF, EGFR, YY1, PRDX2, NRAS, MAPK8, CCND1, CALD1, CASP3, ERBB2, AKT1, HMOX1, MAPK1, HES1, HRAS, MAPK3, CREBBP, JUN, SMAD3, PARP1, MMP2, VEGFA, MAPK11, IL6, CDK4, BCL2, PECAM1, BAX
HC Toxin MCF7 DOWN	0.07	3.18	8.5	RET, CREBBP, CCND1
Mebendazole HL60 DOWN	0.07	3.18	8.5	MYC, BCL2, CXCR4
Caspan CTD 00000180	0.001	3.17	31.77	CEBPB, PARP1, DUSP1, FGF2, IL2, VEGFA, CCND1, CALD1, MYC, CPD, KDR, TIMP2, FAS, BAX, CTNNB1, PPARG
Vorinostat PC3 DOWN	0.01	3.15	15.66	GUCY1A3, CREBBP, WT1, SCO2, PLAU, VEGFC, NFKB1
Co-Dergocrine Mesilate HL60 DOWN	0.04	3.15	10.25	WT1, MYC, BCL2, MAPK12
Lycorine PC3 UP	0.001	3.15	20.84	JUN, IL6, CDKN1A, DUSP1, MYC, IL1B, HMOX1, MITF, PTGS2, ETS1
Quercetin CTD 00006679	0.001	3.14	130.04	RB1, CDKN1A, PTEN, BRCA1, TNF, CCND1, PLAU, MYC, CASP3, CASP1, TIMP2, AKT1, HRAS, PARP1, DUSP1, MITF, FOS, DYNLL1, MMP9, ETV4, DDB2, SFRP1, MSH2, PIK3CA, IFNG, IL1B, PECAM1, PPARG, CFTR, CEBPB, HPR, PTGS2, EGFR, PRDX2, NRAS, MAPK8, ERBB2, HMOX1, MAPK1, HES1, MAPK3, CREBBP, JUN, TGFB1, JAG1, NOS2, NOS3, MAPK14, NFKB1, ESR2, IL2, VEGFA, CCDC88A, IL6, APC, CDK4, SNAI1, BCL2, FAS, BAX, CTNNB1, KRAS
Cefotiam PC3 DOWN	0.27	3.14	4.06	ATM
Monobenzone PC3 DOWN	0.04	3.14	10.16	SMAD3, PLAU, MAPK1, HES1
Norgestrel CTD 00006422	0.04	3.12	10.06	BCL2, RLN1, TNF, VEGFA
Anisomycin MCF7 UP	0.001	3.12	27.25	CREBBP, JUN, JAG1, DUSP1, STAT3, FOS, TNF, NFKB1, VEGFA, IL6, PLAU, CASP3, EP300, HES1
Lanatoside C PC3 UP	0.001	3.11	16.95	JUN, IL6, CDKN1A, DUSP1, SNAI1, CXCR4, FOS, PTGS2
Mitoxantrone PC3 DOWN	0.001	3.11	18.59	JUN, CEBPB, JAG1, DUSP1, MYC, HES1, NUP153, ATM, VEGFA
Vorinostat HL60 DOWN	0.001	3.09	21.72	CREBBP, WT1, PLAU, MYC, BCL2, PECAM1, EP300, CXCR4, TNF, NFKB1, VEGFA
Sp600125 Lincs	0.28	3.08	3.93	MAPK8
0179445-0000 Pc3 Up	0.28	3.08	3.93	PTGS2
Corilagin TTD 00007282	0.28	3.08	3.93	PPARG
Ag-028671 Mcf7 Up	0.14	3.08	6.1	CDKN1A, FAS
Decabromodiphenyl Oxide CTD 00000574	0.14	3.08	6.1	MAPK8, CASP3
Ouabain PC3 UP	0.001	3.08	16.52	JUN, IL6, CDKN1A, DUSP1, MITF, FOS, PTGS2, NFKB1
N-Nitrosodiethylamine Ctd 00005817	0.08	3.06	7.9	PLAU, IL1B, BCL2
Picrotoxinin HL60 DOWN	0.14	3.05	5.99	PLAU, WT1
Digitoxigenin HL60 UP	0.001	3.04	16.11	JUN, IL1B, CPD, CASP1, EP300, FOS, PTGS2, NFKB1
Ly-294002 Hl60 Down	0.28	3.02	3.81	MYC
Ellipticine MCF7 UP	0.28	3.02	3.81	CXCR4
Scriptaid PC3 DOWN	0.001	3.01	23.54	GUCY1A3, CREBBP, SMAD3, VEGFC, ETV4, NFKB1, CCND1, WT1, SCO2, PLAU, CDK4, EP300, ATM
7,8-Benzoflavone Ctd 00000606	0.001	29.89	1381.08	RB1, CDKN1A, JUN, BRCA1, FOS, PTGS2, TNF, FGF2, MMP9, EGFR, MTOR, VEGFA, IL6, IL1B, MAPK1, BAX, MAPK3
Everolimus BOSS	0.001	29.83	900.03	IL6, CASP3, ERBB2, PTEN, KDR, PPARG, HRAS, EGFR, IL2, MTOR, VEGFA
Sulfasalazine CTD 00006719	0.001	29.83	900.03	IL6, IFNG, CASP3, IL1B, BCL2, BAX, TNF, MMP9, EGFR, IL2, NFKB1
Sevoflurane BOSS	0.001	29.77	661.4	IL6, CASP3, MMP2, BCL2, HMOX1, TNF, MMP9, MAPK3
Gentamicin CTD 00006022	0.001	29.77	661.4	CASR, CASP3, HMOX1, MAPK1, ATM, TNF, CFTR, MAPK3
Cp-55940 Ctd 00002329	0.001	29.63	422.75	SMAD3, IL1B, MAPK1, TNF, MAPK3
Phenylbutazone CTD 00006518	0.001	29.63	422.75	CCND1, PTGS2, TNF, NFKB1, ESR2
Galangin CTD 00001740	0.001	29.63	422.75	IL6, IL1B, CASP1, TNF, CFTR
Mecamylamine CTD 00006250	0.001	29.63	422.75	BCL2, CXCR4, AKT1, UBE3A, NFKB1
Ac1l1kon Ctd 00000061	0.001	29.63	422.75	PARP1, DUSP1, CASP3, MAPK14, TNF
Benzo(A)Pyrene 7,8-Dihydrodiol CTD 00000887	0.001	29.63	422.75	MAPK8, PARP1, PTGS2, MAPK14, HRAS
Wortmannin CTD 00000504	0.001	29.59	2165.2	CDKN1A, PTEN, PTGS2, TNF, EGFR, CCND1, CASP3, TIMP2, AKT1, HMOX1, MAPK1, MAPK3, PARP1, NOS3, IFNB1, MMP2, MMP9, MTOR, VEGFA, PIK3CA, IFNG, IL1B, BCL2, BAX, CTNNB1, ATM, CFTR
Capsaicin CTD 00005570	0.001	29.51	3069.04	CEBPB, CDKN1A, PTGS2, TNF, EGFR, MAPK8, CCND1, PLAU, MYC, CASP3, ERBB2, AKT1, HMOX1, MAPK1, NOS1, HRAS, MAPK3, JUN, TGFB1, PARP1, NOS2, DUSP1, NOS3, MMP2, STAT3, FOS, MAPK14, MMP9, NFKB1, MTOR, VEGFA, IL6, IL1B, BCL2, FAS, BAX, ATM, PPARG
Lenalidomide BOSS	0.001	29.39	726.93	IL6, MYC, CASP3, BCL2, PPARG, TNF, IL2, MTOR, VEGFA
Platelet Activating Factor BOSS	0.001	29.39	726.93	IL6, CASP3, MMP2, IL1B, IL13, TNF, MMP9, MAPK3, VEGFA
33258 Hoechst Boss	0.001	29.09	1407.23	JAG1, STAT3, TNF, MMP9, NFKB1, EGFR, VEGFA, PRDX2, IL6, PLAU, CDK4, MYC, CASP3, BCL2, HMOX1, BAX, PPARG, MAPK3
Naringin BOSS	0.001	29.09	335.66	IL6, CASP3, BCL2, TNF
Cadmium Dichloride BOSS	0.001	29.09	335.66	CASP3, BCL2, HMOX1, MAPK3
Pyrazole BOSS	0.001	29.09	335.66	CASP3, BCL2, TNF, ESR2
Cannabidiol BOSS	0.001	29.09	335.66	PRDX2, IL6, CASP3, TNF
Hypochlorous Acid Boss	0.001	29.09	335.66	IL6, CASP3, HMOX1, MAPK3
Chloramphenicol CTD 00005627	0.001	29.09	335.66	JUN, CDKN1A, PARP1, CASP3
Baicalin CTD 00001780	0.001	29.09	335.66	NOTCH1, CCND1, BAX, HES1
Glycyrrhetinic Acid Ctd 00006045	0.001	29.09	335.66	PRKCB, IL1B, PPARG, HRAS
Muramyl Dipeptide Ctd 00005307	0.001	29.09	335.66	IL6, IFNG, IL1B, TNF
Sanguinarine Ctd 00000244	0.001	29.09	945.51	MAPK8, SMAD3, CASP3, MMP2, BCL2, SNAI1, MAPK1, BAX, TNF, MMP9, NFKB1, MAPK3
Disodium Selenite BOSS	0.001	29.09	488.51	IL6, CASP3, BCL2, TNF, IL2, VEGFA
Valsartan BOSS	0.001	29.09	488.51	IL6, ACE, TNF, MMP9, MAPK3, VEGFA
5-Aminosalicylic Acid CTD 00007308	0.001	29.09	488.51	PARP1, IL1B, TIMP2, CASP1, TNF, IL2
Isopropanol CTD 00007325	0.001	29.09	488.51	JUN, IL6, HMOX1, MAPK1, FOS, TNF
Pemetrexed CTD 00003054	0.001	29.09	488.51	ALK, CDKN1A, CCND1, BCL2, FAS, TRAF1
Flufenamic Acid CTD 00005976	0.001	29.09	488.51	CASR, NOS2, PPARG, PTGS2, TNF, CFTR
Gemfibrozil CTD 00007055	0.001	29.09	488.51	CEBPB, JUN, NOS2, IFNG, IL1B, PPARG
Docetaxel CTD 00002688	0.001	29.09	1562.73	RB1, JUN, CDKN1A, PARP1, PTGS2, TNF, FGF2, MMP9, EGFR, VEGFA, IL6, CASP3, ERBB2, BCL2, AKT1, MAPK1, FAS, BAX, HRAS, MAPK3
Thiostrepton CTD 00006881	0.001	29.09	640.69	CDKN1A, CCND1, IL1B, BCL2, HMOX1, BAX, PPARG, NFKB1
Styrene Ctd 00001125	0.001	29.09	640.69	JUN, IL6, IL1B, BCL2, BAX, FOS, PTGS2, TNF
Gnf-Pf-4325 Ctd 00005408	0.001	29.09	1252.57	JUN, CREBBP, SMAD3, MITF, FOS, MAPK14, TNF, VEGFA, MAPK8, MYC, CASP3, IL1B, MAPK1, FAS, CFTR, MAPK3
Lapatinib BOSS	0.001	29.09	792.91	CASP3, ERBB2, PTEN, KDR, BCL2, HRAS, EGFR, MTOR, MAPK3, VEGFA
Nicotinic Acid CTD 00006387	0.001	29.09	792.91	IL6, TGFB1, PARP1, IFNG, IL1B, PECAM1, MAPK1, PPARG, TNF, MAPK3
Rev 5901 CTD 00002161	0.001	29.09	180.01	IL1B, PTGS2
Aclarubicin CTD 00007056	0.001	29.09	180.01	PARP1, CASP3
Betamethasone Valerate Ctd 00005505	0.001	29.09	180.01	IFNG, IL2
5,6-Dichloro-1H-Benzimidazole CTD 00003559	0.001	29.09	180.01	PARP1, CASP3
Ruthenium Ctd 00006710	0.001	29.09	180.01	PARP1, CASP3
P-Cresol Ctd 00001567	0.001	29.09	180.01	IL1B, TNF
Acetazolamide CTD 00005298	0.001	29.09	180.01	MMP2, CASP3
Triciribine CTD 00001109	0.001	29.09	180.01	AKT1, BAX
Mcdf Ctd 00002334	0.001	29.09	180.01	MIR335, CDKN1A
Tonalid CTD 00001589	0.001	29.09	180.01	PPARG, ESR2
Chlorpropamide CTD 00005649	0.001	29.09	180.01	FOS, NFKB1
2,4,4'-Trichlorobiphenyl Ctd 00002976	0.001	29.09	180.01	MAPK1, MAPK3
4,4'-Methylenebis(2-Chloroaniline) Ctd 00006314	0.001	29.09	180.01	PPARG, PTGS2
Propyl Gallate CTD 00006637	0.001	29.09	180.01	HMOX1, ESR2
Berbamine Ctd 00001312	0.001	29.09	180.01	CCND1, CASP3
Ginsenoside Rh1 Ctd 00003920	0.001	29.09	180.01	FOS, TNF
Aluminum Chloride Ctd 00000571	0.001	29.09	180.01	CASR, CASP3
Iprodione Ctd 00001594	0.001	29.09	180.01	PPARG, FOS
2'-Hydroxychalcone Ttd 00000428	0.001	29.09	180.01	IL1B, PTGS2
N-Phenyl-1H-Pyrazole-3-Carboxamide TTD 00009559	0.001	29.09	180.01	BRCA1, NFKB1
Gefitinib TTD 00008188	0.001	29.09	180.01	ERBB2, EGFR
Gsk690693 Ttd 00008336	0.001	29.09	180.01	PRKCB, AKT1
Nitric Oxide CTD 00006402	0.001	28.95	1474.99	GUCY1A3, GUCY1B3, PARP1, NOS2, NOS3, MMP2, PRL, TNF, IFNG, CASP10, CPD, CASP3, IL1B, BCL2, TIMP2, HMOX1, FAS, BAX, PPARG
Electrocorundum CTD 00005364	0.001	28.85	859.24	CDKN1A, JUN, IL6, TGFB1, MMP2, IL1B, FOS, TNF, MMP9, EGFR, VEGFA
Thymidine BOSS	0.001	28.83	1543.07	IL13, STAT3, TNF, MMP9, IL2, EGFR, MTOR, VEGFA, PRDX2, IL6, IFNG, CDK4, MYC, CASP3, KDR, BCL2, HMOX1, ATM, PPARG, MAPK3
Capecitabine Boss	0.001	28.8	706.83	IL6, ERBB2, PTEN, BCL2, PPARG, HRAS, EGFR, MTOR, VEGFA
506-26-3 Ctd 00007216	0.001	28.8	706.83	MYC, CASP3, HMOX1, PPARG, PTGS2, TNF, CFTR, IL2, MAPK3
Dichloromercury CTD 00006273	0.001	28.76	1232.94	PARP1, IFNB1, STAT3, FOS, MAPK14, TNF, NFKB1, IL6, IFNG, CASP3, IL1B, BCL2, HMOX1, MAPK1, FAS, MAPK3
Troglitazone BOSS	0.001	28.72	554.64	IL6, CASP3, BCL2, PPARG, TNF, MAPK3, VEGFA
1,6,7,8,9,11a,12,13,14,14a-Decahydro-1,13-Dihydroxy-6-Methyl-4H-Cyclopent [F]Oxacyclotridecin-4-One CTD 00007351	0.001	28.72	554.64	IL6, SMAD3, CASP3, IL1B, MITF, CFTR, VEGFA
Fitc Boss	0.001	28.66	925.89	IL6, CASP3, MMP2, ERBB2, KDR, BCL2, TNF, MMP9, EGFR, NFKB1, MAPK3, VEGFA
Gefitinib CTD 00003879	0.001	28.63	1300.53	CDKN1A, PARP1, STAT3, PTGS2, EGFR, NFKB1, MTOR, ESR2, MAPK8, CCND1, MYC, CASP3, ERBB2, AKT1, MAPK1, KRAS, MAPK3
Nutlin-3B BOSS	0.001	28.57	402.17	CASP3, BCL2, BAX, ATM, MAPK3
Digoxigenin CTD 00005824	0.001	28.57	402.17	SMAD3, IL1B, MITF, CFTR, VEGFA
Benzamide CTD 00001769	0.001	28.57	402.17	PARP1, MYC, CASP3, TNF, EGFR
Apigenin CTD 00007429	0.001	28.57	1523.82	JUN, CDKN1A, PARP1, BRCA1, FOS, TNF, MMP9, NFKB1, ESR2, VEGFA, CASP3, IL1B, ERBB2, BCL2, AKT1, MAPK1, BAX, PPARG, CFTR, MAPK3
Lead(II) Acetate CTD 00000394	0.001	28.57	1146.31	RET, CDKN1A, NOS3, CXCR4, TNF, EGFR, CCND1, MSH2, IFNG, CASP10, CASP3, IL1B, MAPK1, HRAS, MAPK3
Acetaldehyde CTD 00005293	0.001	28.53	1749.12	JUN, TGFB1, SMAD3, NOS2, PRKCB, IFNB1, MMP2, FOS, PTGS2, TNF, MMP9, NFKB1, MTOR, IL6, MAPK8, IL1B, CASP3, BCL2, BAX, MAPK1, HES1, PPARG, MAPK3
Acridine Orange BOSS	0.001	28.44	621.03	IL6, CDK4, CASP3, BCL2, HMOX1, TNF, MTOR, MAPK3
Okadaic Acid BOSS	0.001	28.44	621.03	IL6, CASP3, PTEN, BCL2, TNF, EGFR, MTOR, MAPK3
Bromoacetate CTD 00000832	0.001	28.44	621.03	IL6, NOS2, CASP10, IL1B, HMOX1, ATM, BRCA1, TNF
Capsazepine CTD 00002764	0.001	28.44	621.03	MAPK8, IL6, CASP3, IL1B, AKT1, MAPK1, TNF, MAPK3
Dieldrin CTD 00005808	0.001	28.44	621.03	ALK, JUN, CASP3, BCL2, MAPK1, ESR2, MAPK3, VEGFA
2-Chloroethyl Ethyl Sulfide Ctd 00001489	0.001	28.44	621.03	IL6, PARP1, CASP3, BCL2, AKT1, BAX, ATM, PTGS2
Sb 202190 Ttd 00010831	0.001	28.44	621.03	MAPK11, MAPK8, AKT1, MAPK1, PTGS2, MAPK14, EGFR, MAPK12
Deoxynivalenol Ctd 00000341	0.001	28.31	1730.29	CREBBP, JUN, CDKN1A, DUSP1, PTEN, CXCR4, TRAF1, FOS, MAPK14, PTGS2, IL2, IL6, MAPK8, IFNG, MYC, IL1B, CASP3, BCL2, BAX, HMOX1, MAPK1, PPARG, MAPK3
Fenretinide Boss	0.001	28.24	468.8	CASP3, IL1B, PPARG, MMP9, NFKB1, MTOR
Ml-7 Ctd 00002750	0.001	28.24	468.8	CCND1, MYC, CASP3, MAPK1, CTNNB1, MAPK3
Chalcone BOSS	0.001	28.24	687.64	IL6, CASP3, MMP2, BCL2, HMOX1, TNF, MMP9, MAPK3, VEGFA
Budesonide CTD 00007317	0.001	28.24	687.64	IL6, IFNG, IL1B, IL13, STAT3, BCL2, TNF, CFTR, VEGFA
Labetalol CTD 00006196	0.001	28.24	248.23	MAPK1, PRL, MAPK3
Phorbol 12,13-Dibutyrate CTD 00007051	0.001	28.24	248.23	CDKN1A, MAPK1, MAPK3
Betamethasone CTD 00005504	0.001	28.24	248.23	IL1B, CFTR, VEGFA
Tosyllysyl Chloromethane CTD 00006909	0.001	28.24	248.23	TNF, FGF2, NFKB1
Pk 11195 Ctd 00001773	0.001	28.24	248.23	CASP3, BCL2, BAX
5'-N-Ethylcarboxamidoadenosine Ctd 00007322	0.001	28.24	248.23	IL13, MAPK1, TNF
Alsterpaullone TTD 00001927	0.001	28.24	248.23	SMAD3, IL1B, CFTR
Quinalizarin TTD 00010453	0.001	28.24	248.23	NOS3, MAPK1, BRCA1
Histamine CTD 00006100	0.001	28.24	906.94	CDKN1A, IL6, CCND1, IFNG, NOS2, MAPK1, FOS, PTGS2, TNF, EGFR, NFKB1, MAPK3
Ly 294002 Ctd 00003061	0.001	28.19	3038.14	RB1, CDKN1A, PTEN, PTGS2, TNF, FGF2, ETS1, EGFR, MAPK8, CCND1, CASP3, ERBB2, TIMP2, AKT1, HMOX1, MAPK1, MAPK3, JUN, TGFB1, PARP1, NOS3, MMP2, STAT3, NUP153, MMP9, NFKB1, IL2, MTOR, VEGFA, IL6, PIK3CA, IFNG, IL1B, SNAI1, BCL2, FAS, BAX, CTNNB1, ATM, CFTR
Gefitinib BOSS	0.001	28.04	1263.13	ALK, STAT3, PTEN, EGFR, MTOR, VEGFA, PRDX2, IL6, MYC, CASP3, ERBB2, KDR, BCL2, BAX, PPARG, HRAS, MAPK3
Luteolin CTD 00007430	0.001	28	1555.28	JUN, CDKN1A, PARP1, STAT3, FOS, PTGS2, TNF, MMP9, NFKB1, ESR2, EGFR, VEGFA, MAPK8, CASP3, IL1B, BCL2, AKT1, MAPK1, BAX, CFTR, MAPK3
Spironolactone CTD 00006774	0.001	28	535.53	IL6, IFNG, CASP3, IL1B, PPARG, TNF, IL2
2,6-Di-Tert-Butyl-4-Methylphenol CTD 00005548	0.001	28	535.53	TGFB1, PARP1, CASP3, HMOX1, COX2, PPARG, TNF
Triclosan CTD 00006933	0.001	27.83	888.63	CDKN1A, JUN, IL6, SMAD3, CCND1, PLAU, IL1B, IL13, PPARG, PTGS2, TNF, ESR2
Flavopiridol Hydrochloride BOSS	0.001	27.83	315.89	CASP3, BCL2, PPARG, TNF
Oseltamivir BOSS	0.001	27.83	315.89	IL6, ERBB2, TNF, MMP9
Octreotide CTD 00007059	0.001	27.83	315.89	CASP3, FAS, PRL, VEGFA
Nadide CTD 00006363	0.001	27.83	315.89	PARP1, BCL2, BAX, HRAS
4,5,6,7-Tetrabromobenzotriazole CTD 00003398	0.001	27.83	315.89	CASP3, BCL2, BAX, NFKB1
Erlotinib BOSS	0.001	27.76	1245.09	ALK, STAT3, PTEN, BRCA1, MMP9, EGFR, MTOR, VEGFA, IL6, MYC, CASP3, ERBB2, KDR, BCL2, PPARG, HRAS, MAPK3
3,3'-Diindolylmethane Ctd 00000841	0.001	27.69	1313.39	CDKN1A, PARP1, CXCR4, PTGS2, TNF, ESR2, IL6, CCND1, PLAU, CDK4, MYC, ERBB2, BCL2, HMOX1, COX2, MAPK1, BAX, MAPK3
Acrolein Ctd 00005313	0.001	27.63	1745.39	JUN, PARP1, MMP2, MAPK14, PTGS2, TNF, MMP9, EGFR, NFKB1, IL2, VEGFA, IL6, MAPK8, IFNG, MYC, CASP3, FAS, BAX, AKT1, HMOX1, CTNNB1, MAPK1, KRAS, MAPK3
Withaferin A PC3 DOWN	0.001	27.59	383.22	SMAD3, PLAU, IL1B, HES1, PPARG
Sodium Hydroxide Boss	0.001	27.59	383.22	PRDX2, IL6, TNF, MMP9, VEGFA
D-Monapterin Boss	0.001	27.59	383.22	IL6, IFNG, TNF, MMP9, IL2
Imiquimod Boss	0.001	27.59	383.22	IL6, IFNG, IFNB1, TNF, IL2
Carbon Tetrachloride Ctd 00005587	0.001	27.59	383.22	IL6, IL1B, TNF, MAPK12, MAPK3
Lanatoside C CTD 00000952	0.001	27.59	383.22	SMAD3, IL1B, MITF, CFTR, VEGFA
Cladribine CTD 00007175	0.001	27.59	383.22	PARP1, CASP3, STAT3, BCL2, TNF
Ziram Ctd 00007014	0.001	27.59	383.22	CASP3, MAPK1, PPARG, TNF, MAPK3
Calcimycin CTD 00005287	0.001	27.47	1227.48	SMAD3, NOS3, IL13, MITF, PTGS2, TNF, IL2, MTOR, VEGFA, IL6, IFNG, CASP3, IL1B, CASP1, HMOX1, MAPK1, MAPK3
Okadaic Acid CTD 00007275	0.001	27.47	1227.48	RB1, CREBBP, JUN, PARP1, FOS, NFKB1, CASP10, CASP3, IL1B, BCL2, AKT1, COX2, MAPK1, BAX, CTNNB1, CFTR, MAPK3
Isoliquiritigenin CTD 00001873	0.001	27.43	450.39	JUN, PARP1, CASP3, BCL2, AKT1, PTGS2
Prednisone CTD 00006606	0.001	27.43	450.39	RB1, CDKN1A, TGFB1, IFNG, IL13, TNF
1-Chloro-2,4-Dinitrobenzene BOSS	0.001	27.32	517.5	IL6, SMAD3, IL1B, IL13, PPARG, TNF, CFTR
Sunitinib CTD 00004175	0.001	27.32	517.5	IL6, NOS3, CASP3, PTEN, KDR, VEGFC, VEGFA
Tetrachloroethylene Ctd 00006849	0.001	27.32	517.5	JUN, IFNG, CASP10, BCL2, BAX, FOS, MAPK14
Esculetin CTD 00000358	0.001	27.32	517.5	MAPK8, CASP3, MAPK1, FAS, BAX, MAPK14, MAPK3
Deferoxamine CTD 00005759	0.001	27.32	1502.28	RB1, JUN, CDKN1A, MMP2, PTGS2, TNF, VEGFA, IL6, MAPK8, CCND1, PLAU, WT1, MYC, CASP3, IL1B, HMOX1, MAPK1, BAX, CTNNB1, ATM, MAPK3
Trichostatin A BOSS	0.001	27.29	1571.52	SMAD2, JAG1, MMP2, STAT3, PTEN, TNF, ETS1, MMP9, EGFR, NFKB1, VEGFA, PRDX2, IL6, CDK4, MYC, CASP3, BCL2, EP300, ATM, PPARG, CFTR, MAPK3
Crizotinib CTD 00004714	0.001	27.23	584.6	ALK, CASP3, STAT3, AKT1, MAPK1, KRAS, EGFR, MAPK3
Kaempferol CTD 00000297	0.001	27.17	1278.72	JUN, CDKN1A, NOS2, FOS, PTGS2, TNF, ESR2, IL6, CASP3, IL1B, BCL2, AKT1, MAPK1, BAX, ATM, PPARG, CFTR, MAPK3
Caffeic Acid Phenethyl Ester CTD 00002352	0.001	27.12	718.99	CDKN1A, JUN, CCND1, IFNG, HMOX1, BAX, TNF, IL2, NFKB1, MTOR
Sodium Sulfate Boss	0.001	27.08	786.32	IL6, IFNG, MYC, CASP3, IL1B, STAT3, PPARG, TNF, MMP9, EGFR, NFKB1
Decitabine BOSS	0.001	26.67	1660.75	JAG1, MMP2, STAT3, PTEN, BRCA1, TNF, CXCL14, MMP9, EGFR, NFKB1, IL2, MIR203A, VEGFA, PRDX2, IL6, MSH2, CCND1, WT1, MYC, CASP3, BCL2, EP300, HRAS, MAPK3
Merphalan BOSS	0.001	26.67	433.15	IL6, CASP3, STAT3, BCL2, TNF, VEGFA
Linalool CTD 00000957	0.001	26.67	433.15	CDKN1A, JUN, MYC, AKT1, EGFR, NFKB1
Acrylamide Ctd 00007343	0.001	26.67	500.45	CDKN1A, CCND1, CASP3, ERBB2, ATM, FGF2, EGFR
Sildenafil Citrate BOSS	0.001	26.67	567.7	IL6, CASP3, BCL2, PPARG, TNF, MMP9, MAPK3, VEGFA
Epinephrine CTD 00005907	0.001	26.67	567.7	IL6, CASP3, IL1B, MAPK1, FAS, TNF, MTOR, MAPK3
Resveratrol-13C6 TTD 00010554	0.001	26.67	567.7	CASP3, AKT1, MITF, PPARG, BRCA1, PTGS2, NFKB1, ESR2
Abt-737 Ctd 00004466	0.001	26.67	229.7	CASP3, BCL2, BAX
Candesartan CTD 00002974	0.001	26.67	229.7	NOS3, TNF, VEGFA
Enantone (TN) CTD 00007140	0.001	26.67	229.7	CASP3, AKT1, BAX
Nppb Ctd 00002434	0.001	26.67	229.7	CCND1, CASP3, CFTR
2-Arachidonoylglycerol CTD 00003218	0.001	26.67	229.7	PPARG, PTGS2, IL2
Nilotinib CTD 00004428	0.001	26.67	229.7	JUN, CASP3, FOS
Nebivolol CTD 00002249	0.001	26.67	229.7	NOS3, PTGS2, ESR2
Saquinavir Ctd 00007257	0.001	26.67	229.7	IL6, IL1B, TNF
Fenthion CTD 00005965	0.001	26.67	229.7	JUN, MYC, FOS
Chembl199925 Ttd 00003764	0.001	26.67	229.7	CASP3, BRCA1, ESR2
Vorinostat TTD 00011826	0.001	26.67	229.7	ACE, MITF, CFTR
Amiodarone BOSS	0.001	26.67	297.99	IL6, ACE, TNF, MTOR
Sitagliptin BOSS	0.001	26.67	297.99	IL6, ACE, CASP3, TNF
Rolipram BOSS	0.001	26.67	297.99	IL6, CASP3, TNF, CFTR
Mls003115428 Ctd 00005749	0.001	26.67	297.99	MYC, PRL, TNF, NFKB1
2H-1-Benzopyran-2-One, 7-[(3,7-Dimethyl-2,6-Octadienyl)Oxy]- CTD 00003446	0.001	26.67	297.99	JUN, DUSP1, PTGS2, VEGFA
Teniposide CTD 00006838	0.001	26.67	297.99	MYC, MITF, ATM, FGF2
Montelukast CTD 00003205	0.001	26.67	297.99	IL6, CASP3, FAS, TNF
Bonuten CTD 00005895	0.001	26.67	297.99	IL6, ACE, TNF, VEGFA
Parthenolide TTD 00010048	0.001	26.67	297.99	SMAD3, IL1B, MITF, CFTR
Ag 213 Ttd 00001636	0.001	26.67	297.99	ERBB2, MAPK1, NFKB1, EGFR
Chrysin CTD 00001976	0.001	26.67	1040.61	CDKN1A, JUN, FOS, PTGS2, TNF, ESR2, IL6, CASP3, IL1B, CASP1, BCL2, AKT1, HMOX1, CTNNB1, PPARG
Etoposide BOSS	0.001	26.67	365.72	CASP3, BCL2, MAPK1, ATM, MAPK3
Perfluorodecanoic Acid CTD 00001721	0.001	26.67	365.72	AKT1, HMOX1, MAPK1, PPARG, MAPK3
64551-89-9 Ctd 00001258	0.001	26.67	160.26	CDKN1A, BAX
DHEA Sulfate CTD 00007274	0.001	26.67	160.26	IL1B, PRL
Lisuride Ctd 00006219	0.001	26.67	160.26	IFNG, PRL
Pepstatin CTD 00001504	0.001	26.67	160.26	PARP1, AKT1
5,7-Dimethoxyflavone Ctd 00002502	0.001	26.67	160.26	CASP3, BRCA1
Propyl 4-Hydroxybenzoate CTD 00000273	0.001	26.67	160.26	PPARG, ESR2
678-39-7 Ctd 00001619	0.001	26.67	160.26	ERBB2, ESR2
4-Methylhistamine Ctd 00001201	0.001	26.67	160.26	IFNG, TNF
Diflunisal CTD 00005819	0.001	26.67	160.26	PPARG, FOS
3-Nitrofluoranthene Ctd 00001617	0.001	26.67	160.26	IL6, TNF
Osthole CTD 00002069	0.001	26.67	160.26	MMP2, MMP9
Flunisolide CTD 00000364	0.001	26.67	160.26	TNF, CFTR
126643-37-6 Ctd 00002813	0.001	26.67	160.26	IL1B, RHOA
Ilomastat TTD 00008545	0.001	26.67	160.26	MMP2, MMP9
Beclomethasone TTD 00002323	0.001	26.67	160.26	IL1B, CFTR
S-(+)-Rolipram Ttd 00010743	0.001	26.67	160.26	CREBBP, CFTR
Nsc-645827 Ttd 00009776	0.001	26.67	160.26	IL1B, MITF
Eicosapentaenoic Acid BOSS	0.001	26.37	1024.56	IL13, STAT3, TNF, MMP9, EGFR, IL2, VEGFA, IL6, IFNG, CASP3, IL1B, BCL2, HMOX1, PPARG, MAPK3
Beclomethasone CTD 00005468	0.001	26.27	753.63	IL6, NOS2, MMP2, IL1B, IL13, FOS, TNF, FGF2, MMP9, CFTR, VEGFA
Propranolol Hydrochloride BOSS	0.001	26.23	686.21	IL6, ACE, CASP3, MMP2, PPARG, TNF, MMP9, EGFR, MAPK3, VEGFA
1h-Pyrazolo[3,4-D]Pyrimidine CTD 00000742	0.001	26.23	686.21	CDKN1A, JUN, PIK3CA, DUSP1, CASP3, FAS, CTNNB1, PTN, PTGS2, EGFR
Cimetidine CTD 00005672	0.001	26.23	686.21	IFNG, CASP3, IL1B, CASP1, BCL2, BAX, PRL, TNF, EGFR, NFKB1
Cycloheximide BOSS	0.001	26.23	1351.26	SMAD3, MMP2, STAT3, MITF, TNF, MMP9, NFKB1, EGFR, MTOR, VEGFA, PRDX2, IL6, PLAU, CASP3, IL1B, BCL2, HMOX1, PPARG, CFTR, MAPK3
Rosuvastatin BOSS	0.001	26.18	618.87	IL6, CASP3, MMP2, BCL2, PPARG, TNF, MMP9, MAPK3, VEGFA
Azathioprine CTD 00005457	0.001	26.18	618.87	JUN, IL6, STAT3, AKT1, MAPK1, FOS, TNF, MTOR, MAPK3
Lactacystin CTD 00002698	0.001	26.12	551.59	CEBPB, IL6, TGFB1, CCND1, PRKCB, BCL2, CTNNB1, TNF
Trioxsalen BOSS	0.001	26.05	484.32	PRDX2, IL6, CASP3, HMOX1, TNF, MTOR, MAPK3
Mitomycin C BOSS	0.001	26	873.22	BRCA1, TNF, EGFR, IL2, VEGFA, IL6, MYC, CASP3, BCL2, PPARG, ATM, HRAS, MAPK3
Cilostazol BOSS	0.001	25.95	416.99	IL6, CASP3, HMOX1, TNF, MMP9, NFKB1
Psoralen BOSS	0.001	25.95	416.99	PRDX2, IL6, CASP3, BCL2, TNF, VEGFA
Emodin BOSS	0.001	25.81	670.74	IL6, PIK3CA, CASP3, MMP2, IL1B, BCL2, PPARG, TNF, MMP9, MAPK3
L 741211 Ctd 00003280	0.001	25.81	349.51	MAPK8, JUN, IL6, CASP3, PPARG
2,2',3,4,4',5'-Hexachlorobiphenyl Ctd 00001404	0.001	25.81	349.51	MAPK1, BRCA1, PTGS2, IL2, MAPK3
Methyl Viologen BOSS	0.001	25.71	603.45	PRDX2, IL6, CASP3, MMP2, BCL2, HMOX1, TNF, MMP9, MTOR
Trans-Lutein BOSS	0.001	25.68	858.09	MMP2, TNF, MMP9, MTOR, VEGFA, PRDX2, IL6, CASP3, IL1B, BCL2, HMOX1, PPARG, MAPK3
Biotin BOSS	0.001	25.68	858.09	IL13, TNF, EGFR, IL2, VEGFA, PRDX2, IL6, CASP3, IL1B, ERBB2, BCL2, PPARG, MAPK3
Methoxychlor CTD 00006302	0.001	25.6	536.23	CDKN1A, CCND1, DLX4, STAT3, MAPK1, PPARG, ESR2, MAPK3
Methylprednisolone BOSS	0.001	25.6	790.53	IL6, ACE, IFNG, PLAU, IFNB1, CASP3, IL13, BCL2, TNF, MMP9, CFTR, VEGFA
Ganciclovir BOSS	0.001	25.6	281.73	IL6, CASP3, IL2, VEGFA
Alendronate Sodium Boss	0.001	25.6	281.73	IL6, IL1B, TNF, VEGFA
Cyperquat Chloride BOSS	0.001	25.6	281.73	CASP3, BCL2, HMOX1, MTOR
Spermine Tetrahydrochloride BOSS	0.001	25.6	281.73	CASR, IL6, CASP3, TNF
Emetine Ctd 00005892	0.001	25.6	281.73	PARP1, MAPK14, MTOR, VEGFA
Podophyllotoxin TTD 00010285	0.001	25.6	281.73	STAT3, MITF, NFKB1, CFTR
Resveratrol TTD 00010551	0.001	25.45	469.03	CASP3, AKT1, MITF, PPARG, BRCA1, NFKB1, ESR2
In1152 Ctd 00001901	0.001	25.45	910.99	JUN, MITF, FOS, PTGS2, TNF, MMP9, NFKB1, ESR2, CCND1, IFNG, MYC, CASP3, CTNNB1, ATM
Androstanolone BOSS	0.001	25.4	655.83	IL6, CASP3, BCL2, PPARG, PRL, TNF, EGFR, ESR2, MAPK3, VEGFA
N-Acetyl-L-Cysteine CTD 00005305	0.001	25.4	3329.09	RB1, ALK, CDKN1A, PTEN, TNF, FGF2, ETS1, CCND1, PLAU, CASP10, MYC, CASP3, KDR, CASP1, AKT1, EP300, PARP1, MMP2, FOS, MMP9, IFNG, IL1B, PPARG, CFTR, PTGS2, EGFR, MAPK8, HMOX1, MAPK1, MAPK3, JUN, TGFB1, JAG1, NOS2, NOS3, STAT3, MAPK14, NFKB1, ESR2, IL2, MTOR, VEGFA, IL6, SNAI1, BCL2, FAS, BAX, CTNNB1, ATM, KRAS
Titanium Dioxide Ctd 00000489	0.001	25.38	1483.68	CDKN1A, TGFB1, PARP1, IL13, FOS, MAPK14, TNF, MMP9, NFKB1, IL2, VEGFA, IL6, MAPK8, IFNG, IL1B, CASP3, BCL2, PECAM1, FAS, BAX, HMOX1, MAPK1, MAPK3
Clioquinol CTD 00006162	0.001	25.37	843.37	CDKN1A, SMAD3, MMP2, TNF, EGFR, VEGFA, MAPK8, CASP3, CASP1, AKT1, MAPK1, ATM, MAPK3
2-Butanone Boss	0.001	25.31	2001.96	ALK, PTEN, TNF, ETS1, EGFR, PRDX2, NRAS, MAPK8, PLAU, MYC, CASP3, ERBB2, KDR, HMOX1, HRAS, MAPK3, SMAD2, MMP2, IL13, STAT3, MITF, MAPK14, MMP9, NFKB1, IL2, MTOR, VEGFA, IL6, CDK4, BCL2, PPARG
Water BOSS	0.001	25.31	2001.96	PTEN, TNF, EGFR, PRDX2, NRAS, MAPK8, PLAU, MYC, CASP3, ERBB2, KDR, HMOX1, HRAS, MAPK3, SMAD2, MMP2, IL13, STAT3, MITF, MAPK14, MMP9, NFKB1, IL2, MTOR, VEGFA, IL6, IFNG, CDK4, IL1B, BCL2, PPARG
Ferrous Sulfate Ctd 00001009	0.001	25.26	588.66	CDKN1A, CEBPB, JUN, IL6, STAT3, HMOX1, TNF, CXCL14, NFKB1
Hydroxychlor CTD 00003776	0.001	25.26	213.39	CXCR4, PPARG, ESR2
Clobenpropit CTD 00003065	0.001	25.26	213.39	CDKN1A, CCND1, IFNG
Mometasone Furoate CTD 00002293	0.001	25.26	213.39	IL1B, TNF, CFTR
Eipa Ctd 00001833	0.001	25.26	213.39	IL1B, NFKB1, VEGFA
Alsterpaullone CTD 00003709	0.001	25.26	213.39	SMAD3, IL1B, CFTR
Cannabidiol CTD 00005567	0.001	25.26	213.39	IFNG, PPARG, PTGS2
Alprazolam CTD 00005358	0.001	25.26	213.39	CREBBP, PARP1, CASP3
Hts-05058 Ttd 00008459	0.001	25.26	213.39	STAT3, PPARG, EGFR
Pinaflavol TTD 00010236	0.001	25.26	213.39	MMP2, IL1B, STAT3
Flavone Boss	0.001	25.1	521.56	IL6, CASP3, STAT3, BCL2, HMOX1, TNF, MAPK3, VEGFA
Raloxifene BOSS	0.001	25.1	521.56	IL6, CASP3, BCL2, TNF, EGFR, ESR2, MAPK3, VEGFA
Pd 98059 Ctd 00003206	0.001	25.04	2639.26	RB1, CEBPB, CDKN1A, PTEN, BRCA1, PTGS2, TNF, FGF2, EGFR, MAPK8, CCND1, MYC, CASP3, AKT1, HMOX1, EP300, MAPK1, MAPK3, JUN, TGFB1, PARP1, NOS2, NOS3, MMP2, STAT3, NUP153, FOS, MMP9, NFKB1, IL2, VEGFA, IL6, IFNG, IL1B, BCL2, FAS, BAX, CTNNB1, ATM, PPARG, CFTR
Minocycline Hydrochloride Boss	0.001	25	641.47	IL6, CASP3, MMP2, IL1B, BCL2, TNF, MMP9, IL2, MAPK3, VEGFA
Nilotinib BOSS	0.001	25	334.47	IL6, CASP3, STAT3, MTOR, MAPK3
Naproxen Ctd 00006380	0.001	25	334.47	CCND1, IL1B, PTGS2, TNF, NFKB1
Toluidine Blue O Boss	0.001	24.89	454.53	IL6, CASP3, BCL2, PPARG, TNF, MMP9, VEGFA
22-Hydroxycholesterol Ctd 00000121	0.001	24.89	454.53	IFNG, NOS3, HMOX1, FOS, PTGS2, TNF, ESR2
Ethacrynic Acid Ctd 00005929	0.001	24.89	454.53	MAPK8, CCND1, IL1B, HMOX1, PPARG, MAPK14, MAPK3
Lorazepam BOSS	0.001	24.81	1248.78	MMP2, STAT3, PTEN, TNF, MMP9, EGFR, NFKB1, VEGFA, PRDX2, IL6, IFNG, MYC, CASP3, ERBB2, SNAI1, BCL2, EP300, ATM, PPARG, MAPK3
Fluoxetine CTD 00005988	0.001	24.79	694.6	CDKN1A, JUN, CCND1, MYC, CASP3, BCL2, MAPK1, PRL, FOS, TNF, MAPK3
Butyric Acid BOSS	0.001	24.73	1058.03	MMP2, STAT3, TNF, MMP9, VEGFA, PRDX2, IL6, IFNG, PLAU, CDK4, MYC, CASP3, IL1B, BCL2, EP300, PPARG, MAPK3
Carisoprodol BOSS	0.001	24.62	1483.09	IL13, STAT3, PTEN, TNF, MMP9, EGFR, NFKB1, IL2, MTOR, VEGFA, PRDX2, IL6, MAPK8, PLAU, MYC, IL1B, CASP3, BCL2, BAX, HMOX1, EP300, ATM, PPARG, MAPK3
Camptothecin CTD 00005566	0.001	24.62	1112.39	RB1, JUN, CDKN1A, PARP1, BRCA1, TNF, MTOR, VEGFA, CASP3, IL1B, BCL2, AKT1, EP300, MAPK1, FAS, BAX, ATM, MAPK3
Diphosphate BOSS	0.001	24.62	266.91	PRDX2, CASP3, BCL2, BRCA1
Rhodamine 123 BOSS	0.001	24.62	266.91	PRDX2, CASP3, BCL2, MAPK3
Calycosin CTD 00003727	0.001	24.62	387.51	PRDX2, CDKN1A, MAPK1, UBE3A, BRCA1, MAPK3
Urea CTD 00006965	0.001	24.62	143.92	KDR, HMOX1
Diacerein CTD 00001185	0.001	24.62	143.92	IL1B, CASP3
Cyclic Gmp CTD 00006063	0.001	24.62	143.92	GUCY1A3, MAPK8
Roxarsone CTD 00006708	0.001	24.62	143.92	NOS3, MMP9
Glycerol CTD 00006038	0.001	24.62	143.92	MYC, HMOX1
Nabumetone CTD 00001691	0.001	24.62	143.92	BCL2, FOS
Am-630 Ctd 00003207	0.001	24.62	143.92	MAPK1, MAPK3
Propafenone CTD 00006629	0.001	24.62	143.92	CASP3, MTOR
Terazosin CTD 00001883	0.001	24.62	143.92	BCL2, BAX
Etilamide CTD 00005541	0.001	24.62	143.92	CASP3, BAX
Dextroamphetamine CTD 00005780	0.001	24.62	143.92	BCL2, BAX
Neocuproine CTD 00000090	0.001	24.62	143.92	TNF, EGFR
Fraxetin CTD 00003443	0.001	24.62	143.92	CASP3, BAX
N'-Nitrosonornicotine Ctd 00000423	0.001	24.62	143.92	BCL2, NFKB1
N,N-Dimethyl-4-Nitrosoaniline CTD 00000422	0.001	24.62	143.92	SMAD3, PPARG
Dids CTD 00007207	0.001	24.62	143.92	CASP3, CFTR
8-Hydroxyquinoline Ttd 00001331	0.001	24.62	143.92	SMAD3, PPARG
Roscovitine TTD 00010683	0.001	24.62	143.92	RB1, CCND1
4-Amino-1,8-Naphthalimide TTD 00000922	0.001	24.62	143.92	PARP1, BRCA1
Cgs-27023a Ttd 00002801	0.001	24.62	143.92	MMP2, MMP9
Pazopanib TTD 00010053	0.001	24.62	143.92	KDR, PPARG
Chembl211740 Ttd 00003979	0.001	24.62	143.92	CASP3, NFKB1
Omega-3 Fatty Acids Boss	0.001	24.49	922.79	ACE, IL13, TNF, MMP9, NFKB1, IL2, IL6, IFNG, CASP3, IL1B, ERBB2, BCL2, HMOX1, PPARG, MAPK3
Adenosine Triphosphate CTD 00005324	0.001	24.47	801.65	ALK, PARP1, NOS2, TNF, IL6, PIK3CA, CASP3, IL1B, CASP1, BCL2, MAPK1, CFTR, MAPK3
Topotecan Hydrochloride Boss	0.001	24.41	560.8	CASP3, IL1B, BCL2, MITF, ATM, BRCA1, CFTR, EGFR, VEGFA
Dl-Homocysteine Ctd 00006102	0.001	24.41	560.8	NOS2, NOS3, CASP3, BCL2, MAPK1, BAX, MAPK14, MMP9, MAPK3
Berberine BOSS	0.001	24.3	734.65	IL6, PLAU, CASP3, MMP2, STAT3, BCL2, HMOX1, PPARG, TNF, MMP9, EGFR, MAPK3
Rotenone BOSS	0.001	24.3	734.65	JUN, IL6, PLAU, CASP3, STAT3, BCL2, HMOX1, PPARG, TNF, MTOR, MAPK3, VEGFA
Emodin CTD 00005893	0.001	24.29	1031.35	RB1, PARP1, STAT3, MAPK14, TNF, ESR2, RHOA, VEGFA, IL6, PIK3CA, CDK4, CASP3, BCL2, PECAM1, AKT1, ATM, PPARG
Tert-Butyl Hydroperoxide Boss	0.001	24.24	320.47	PRDX2, CASP3, BCL2, HMOX1, MAPK3
6-Deoxy-D-Galactose BOSS	0.001	24.24	320.47	PRDX2, IL6, ERBB2, SNAI1, TNF
Danthron CTD 00000135	0.001	24.24	320.47	CASP3, CASP1, BCL2, FAS, BAX
Promegestone CTD 00006626	0.001	24.24	320.47	CCND1, MYC, MAPK1, FOS, MAPK3
Kenpaullone CTD 00003686	0.001	24.24	320.47	SMAD3, CASP3, IL1B, CTNNB1, CFTR
Su 5416 Ctd 00003630	0.001	24.24	320.47	NOS2, KDR, AKT1, CFTR, VEGFA
Pyrrolidine Dithiocarbamate CTD 00001021	0.001	24.15	1443.53	JUN, CEBPB, NOS2, MMP2, TRAF1, FOS, PTGS2, TNF, MMP9, EGFR, NFKB1, IL2, MTOR, IL6, IFNG, PLAU, MYC, IL1B, CASP3, BCL2, AKT1, HMOX1, MAPK1, MAPK3
Gallic Acid BOSS	0.001	24	721.7	MAPK8, IL6, CASP3, MMP2, STAT3, BCL2, PPARG, TNF, MMP9, MTOR, MAPK3, VEGFA
Doxorubicin	0.001	24	198.93	ERBB2, BCL2, CASP1
Gsk1007102b Gsk	0.001	24	198.93	RET, KDR, AKT1
Trimipramine MCF7 UP	0.001	24	198.93	JUN, DUSP1, FOS
Plasmasteril BOSS	0.001	24	198.93	IL6, TNF, VEGFA
Indoxyl Sulfate BOSS	0.001	24	198.93	IL6, STAT3, MAPK3
Methimazole BOSS	0.001	24	198.93	IL6, ATM, TNF
Acacetin CTD 00001104	0.001	24	198.93	SMAD3, CASP3, CFTR
Coumarin CTD 00001428	0.001	24	198.93	PARP1, BCL2, BAX
Rosuvastatin CTD 00003899	0.001	24	198.93	NOS3, CASP3, BCL2
Diethyl Phthalate Ctd 00000348	0.001	24	198.93	CASP3, PPARG, ESR2
Pyridaben CTD 00003936	0.001	24	198.93	PARP1, BCL2, PPARG
Sunitinib TTD 00011140	0.001	24	198.93	RET, NOS3, KDR
Acacetin TTD 00001549	0.001	24	198.93	SMAD3, CASP3, CFTR
DMA-4 Herbicide BOSS	0.001	24	374.05	PRDX2, IL6, CASP3, BCL2, TNF, EGFR
Chlorogenic Acid Boss	0.001	24	374.05	IL6, CASP3, BCL2, TNF, NFKB1, MTOR
Silica BOSS	0.001	24	374.05	IL6, ACE, CASP3, IL1B, HMOX1, TNF
Dacinostat CTD 00004220	0.001	24	374.05	RB1, CDKN1A, CASP3, BCL2, BAX, BRCA1
Pioglitazone BOSS	0.001	23.91	775.68	ACE, MMP2, TNF, MMP9, NFKB1, VEGFA, IL6, CASP3, IL1B, TIMP2, BCL2, PPARG, MAPK3
Oxotremorine BOSS	0.001	23.75	1115.54	ACE, MMP2, STAT3, TNF, MMP9, EGFR, NFKB1, MTOR, VEGFA, PRDX2, IL6, CDK4, IL1B, CASP3, KDR, BCL2, HMOX1, PPARG, MAPK3
Dexmedetomidine Boss	0.001	23.7	253.33	IL6, CASP3, TNF, MAPK3
5-Aminosalicylic Acid BOSS	0.001	23.7	253.33	IL6, CASP1, PPARG, TNF
Ademetionine CTD 00006715	0.001	23.7	253.33	TGFB1, CASP3, MAPK1, MAPK3
Dienogest CTD 00001099	0.001	23.7	253.33	IL6, PTGS2, TNF, NFKB1
4-Octylphenol Ctd 00002947	0.001	23.7	253.33	FOS, TNF, HRAS, ESR2
Dacarbazine CTD 00005747	0.001	23.7	253.33	CASP3, MAPK1, MAPK3, VEGFA
Cyclosporin A TTD 00007372	0.001	23.7	253.33	MYC, IL1B, MTOR, NFKB1
Picrotoxinum BOSS	0.001	23.7	481.32	IL6, CASP3, STAT3, BCL2, HMOX1, TNF, NFKB1, MAPK3
Azathioprine BOSS	0.001	23.61	535.06	PRDX2, IL6, ACE, IFNB1, CASP3, BCL2, TNF, EGFR, MTOR
Geldanamycin MCF7 DOWN	0.001	23.53	307.42	RET, JUN, SCO2, MYC, HES1
Inositol 1,4,5-Triphosphate BOSS	0.001	23.53	307.42	PRDX2, CASR, BCL2, MTOR, MAPK3
Phloretin CTD 00006528	0.001	23.53	307.42	NOS3, IL1B, PPARG, ATM, ESR2
Mehp CTD 00000849	0.001	23.53	588.89	CDKN1A, MYC, CASP3, MMP2, BCL2, EP300, BAX, CTNNB1, PPARG, PTGS2
Arsenic Boss	0.001	23.41	1036.11	MMP2, IL13, STAT3, TNF, MMP9, NFKB1, IL2, EGFR, MTOR, VEGFA, PRDX2, IL6, MAPK8, PLAU, CASP3, BCL2, HMOX1, MAPK3
Arsenite BOSS	0.001	23.41	361.34	MAPK8, CASP3, BCL2, HMOX1, MMP9, MAPK3
Methylglyoxal BOSS	0.001	23.41	361.34	IL6, CASP3, BCL2, HMOX1, TNF, MAPK3
Daidzein BOSS	0.001	23.33	415.19	IL6, CASP3, BCL2, BRCA1, TNF, MMP9, ESR2
Lansoprazole CTD 00007481	0.001	23.33	415.19	IFNG, CASP3, HMOX1, PPARG, TNF, FGF2, EGFR
Carbon Monoxide BOSS	0.001	23.33	805.39	ACE, MMP2, MAPK14, TNF, MMP9, NFKB1, VEGFA, IL6, CASP3, IL1B, BCL2, HMOX1, PPARG, MAPK3
Ethisterone BOSS	0.001	23.21	1595.48	PTEN, PRL, BRCA1, TNF, EGFR, PRDX2, MYC, CASP3, ERBB2, KDR, HMOX1, HRAS, MAPK3, ACE, MMP2, IL13, STAT3, MMP9, IL2, VEGFA, IL6, MSH2, IFNG, CDK4, IL1B, BCL2, ATM, PPARG
Thimerosal CTD 00006868	0.001	23.21	1079.35	JUN, SMAD3, DUSP1, IL13, MITF, FOS, MAPK14, TNF, IL6, MAPK8, IFNG, CDK4, IL1B, CASP3, HMOX1, MAPK1, PPARG, CFTR, MAPK3
Ursodiol CTD 00006973	0.001	23.19	1134.64	RB1, CEBPB, PARP1, PRKCB, PTGS2, TNF, EGFR, NFKB1, RHOA, IL6, CCND1, IFNG, CASP3, BCL2, BAX, AKT1, EP300, MAPK1, PPARG, MAPK3
(-)-Epicatechin Boss	0.001	23.19	576.84	IL6, CASP3, MMP2, BCL2, HMOX1, TNF, MMP9, MTOR, MAPK3, VEGFA
Epoprostenol BOSS	0.001	23.16	630.87	PTGIR, IL6, ACE, CASP3, STAT3, KDR, HMOX1, PPARG, TNF, MAPK3, VEGFA
Mg-132 Ctd 00002789	0.001	23.12	1413.88	CEBPB, PTGS2, TNF, EGFR, CCND1, MYC, CASP3, ERBB2, HMOX1, EP300, ACE, PARP1, PRKCB, NOS3, MMP9, NFKB1, ESR2, VEGFA, IL6, IL1B, BCL2, BAX, CTNNB1, PPARG, CFTR
Heparitin BOSS	0.001	23.11	739.24	MMP2, PTN, TNF, MMP9, EGFR, IL2, VEGFA, PRDX2, IL6, PLAU, KDR, PPARG, MAPK3
Imatinib Mesylate BOSS	0.001	23.1	1526.93	ALK, PTEN, BRCA1, TNF, EGFR, PRDX2, NRAS, MYC, CASP3, ERBB2, KDR, HMOX1, HRAS, MAPK3, MMP2, STAT3, MAPK14, NFKB1, IL2, MTOR, VEGFA, IL6, IFNG, WT1, CDK4, BCL2, PPARG
Lenvatinib FDA	0.001	22.86	186.03	RET, KDR, EGFR
Uridine 5'-Diphosphate BOSS	0.001	22.86	186.03	PRDX2, IL6, CASP3
Chloordaan BOSS	0.001	22.86	186.03	RB1, BCL2, ATM
Azinphos-Methyl BOSS	0.001	22.86	186.03	IL1B, MAPK1, PPARG
Eplerenone BOSS	0.001	22.86	186.03	IL6, ACE, MAPK3
Maltotetraose BOSS	0.001	22.86	186.03	IL6, TNF, ESR2
Domperidone CTD 00005868	0.001	22.86	186.03	IL6, TGFB1, PRL
Purvalanol A CTD 00004150	0.001	22.86	186.03	CDKN1A, CASP3, MAPK1
Azinphos-Methyl CTD 00005460	0.001	22.86	186.03	IL1B, MAPK1, PPARG
2-Methoxy-1,4-Naphthoquinone TTD 00000605	0.001	22.86	186.03	SMAD3, MITF, CFTR
Pazopanib Hydrochloride	0.001	22.86	240.87	ALK, RET, MAPK8, KDR
Fluphenazine PC3 UP	0.001	22.86	240.87	CDKN1A, IL6, HMOX1, PTGS2
Maneb Ctd 00006239	0.001	22.86	240.87	CASP3, MAPK1, BAX, MAPK3
Formononetin CTD 00000369	0.001	22.86	240.87	CASP3, BCL2, BAX, ESR2
Cerivastatin CTD 00003073	0.001	22.86	240.87	IL6, CASP3, TNF, RHOA
Deltamethrin CTD 00000882	0.001	22.86	240.87	PRDX2, CASP3, MAPK1, MAPK3
Thiotepa CTD 00006869	0.001	22.86	240.87	CASP3, ERBB2, BCL2, BAX
58-64-0 Ctd 00005321	0.001	22.86	240.87	MAPK1, HRAS, CFTR, MAPK3
Adenosine Diphosphate BOSS	0.001	22.86	295.23	PRDX2, IL6, ACE, TNF, VEGFA
Amsacrine CTD 00005396	0.001	22.86	295.23	MYC, BCL2, BAX, MTOR, MAPK12
Sorafenib Tosylate	0.001	22.86	349.33	RET, IL1B, KDR, PPARG, BRCA1, CFTR
Clomipramine CTD 00005687	0.001	22.86	349.33	IL6, PARP1, CASP3, PPARG, PRL, TNF
Mycophenolic Acid BOSS	0.001	22.86	403.31	IL6, ACE, CASP3, PPARG, TNF, IL2, MTOR
Telmisartan BOSS	0.001	22.86	511.2	IL6, ACE, CASP3, MMP2, BCL2, PPARG, TNF, MMP9, MAPK3
Beta-Carotene BOSS	0.001	22.86	511.2	IL6, CASP3, BCL2, HMOX1, PPARG, TNF, MMP9, MTOR, MAPK3
Brefeldin A BOSS	0.001	22.86	565.2	PRDX2, IL6, SMAD3, CASP3, IL1B, KDR, MITF, TNF, CFTR, MAPK3
Chloroquine BOSS	0.001	22.86	782.11	MMP2, STAT3, TNF, MMP9, IL2, EGFR, MTOR, PRDX2, IL6, CASP3, ERBB2, BCL2, ATM, MAPK3
L-Arginine BOSS	0.001	22.86	836.64	ACE, NOS3, MMP2, IL13, TNF, MTOR, VEGFA, PRDX2, IL6, IFNG, CASP3, BCL2, HMOX1, PPARG, MAPK3
Bendamustine CTD 00000052	0.001	22.86	130.21	PARP1, CASP3
Methylglyoxal CTD 00006677	0.001	22.86	130.21	IL6, CASP3
Benzyl Isothiocyanate CTD 00001509	0.001	22.86	130.21	CDKN1A, PPARG
Malondialdehyde CTD 00006237	0.001	22.86	130.21	HMOX1, TNF
Cinnarizine CTD 00005673	0.001	22.86	130.21	JUN, ESR2
Mestranol CTD 00006278	0.001	22.86	130.21	ESR2, CFTR
Indinavir CTD 00007291	0.001	22.86	130.21	IL6, TNF
Chlorprothixene CTD 00005651	0.001	22.86	130.21	IL1B, PRL
Alachlor CTD 00000004	0.001	22.86	130.21	BCL2, PPARG
Pazopanib CTD 00004656	0.001	22.86	130.21	KDR, PPARG
Acenaphthenequinone CTD 00001105	0.001	22.86	130.21	PTGS2, NFKB1
Mibefradil CTD 00007365	0.001	22.86	130.21	MAPK1, MTOR
Cephalothin CTD 00005614	0.001	22.86	130.21	CASP3, BAX
7-Aca Ctd 00001461	0.001	22.86	130.21	MYC, HMOX1
Cinnarizine TTD 00007193	0.001	22.86	130.21	JUN, ESR2
6,7-Dimethyl-2-Phenylquinoxaline TTD 00001187	0.001	22.86	130.21	CASP3, KDR
Phenylbutazone TTD 00010195	0.001	22.86	130.21	PTGS2, ESR2
Chembl460515 Ttd 00005964	0.001	22.86	130.21	STAT3, NFKB1
Gnf-Pf-3955 Ttd 00008269	0.001	22.86	130.21	IL1B, ESR2
Rescinnamin TTD 00010545	0.001	22.86	130.21	ACE, CFTR
Chembl475540 Ttd 00006054	0.001	22.86	130.21	MMP2, MMP9
Flufenamic Acid-(Benzoic Ring-13C6) TTD 00008058	0.001	22.86	130.21	PPARG, PTGS2
Daidzein CTD 00000166	0.001	22.68	989.89	JUN, CDKN1A, PARP1, NOS3, BRCA1, FOS, PTGS2, EGFR, ESR2, IL6, CCND1, CDK4, MYC, IL1B, CASP3, BCL2, MAPK1, MAPK3
Mifepristone BOSS	0.001	22.56	608.02	IL6, CASP3, IL1B, BCL2, PPARG, PRL, TNF, MMP9, MTOR, MAPK3, VEGFA
3,4-Dihydro-2-Phenyl-2H-1-Benzopyran-3,4-Diol BOSS	0.001	22.56	608.02	IL6, ACE, CASP3, MMP2, ERBB2, BCL2, HMOX1, TNF, MMP9, MTOR, MAPK3
Docetaxel BOSS	0.001	22.54	1089.29	ALK, MMP2, STAT3, PTEN, BRCA1, TNF, MMP9, EGFR, NFKB1, MTOR, VEGFA, IL6, MYC, CASP3, ERBB2, KDR, BCL2, PPARG, HRAS, MAPK3
Mycophenolate Mofetil BOSS	0.001	22.5	499.92	IL6, ACE, IFNG, IFNB1, CASP3, PPARG, TNF, IL2, MTOR
Orlistat CTD 00002339	0.001	22.46	445.95	RB1, IL6, PARP1, CASP3, ERBB2, KDR, TNF, ETV4
Caffeic Acid BOSS	0.001	22.4	391.98	IL6, CASP3, BCL2, TNF, MMP9, MTOR, ESR2
Methacholine BOSS	0.001	22.4	391.98	IL6, IFNG, IL13, PPARG, TNF, MMP9, VEGFA
Gemcitabine Hydrochloride Boss	0.001	22.35	1346.66	ALK, PTEN, BRCA1, TNF, EGFR, PRDX2, MYC, CASP3, ERBB2, KDR, HRAS, MAPK3, MMP2, STAT3, MMP9, NFKB1, IL2, MTOR, VEGFA, IL6, WT1, CDK4, BCL2, ATM, PPARG
Gadolinium Boss	0.001	22.33	337.96	PRDX2, IL6, ACE, IFNB1, TNF, MMP9
Artemisinin BOSS	0.001	22.33	337.96	IL6, CDK4, CASP3, BCL2, TNF, MMP9
Levamisole BOSS	0.001	22.33	337.96	IL6, CASP3, TNF, MMP9, MAPK3, VEGFA
Atenolol CTD 00005448	0.001	22.33	337.96	CASP3, MAPK1, FAS, PTGS2, EGFR, MAPK3
Pimozide CTD 00006561	0.001	22.33	337.96	IL1B, BCL2, MAPK1, PPARG, PRL, MTOR
Vincristine Sulfate BOSS	0.001	22.33	651.25	ALK, PRDX2, IL6, MYC, CASP3, STAT3, BCL2, PPARG, TNF, IL2, MTOR, VEGFA
Nifedipine CTD 00006395	0.001	22.33	651.25	NOS2, NOS3, MYC, BCL2, AKT1, MAPK1, FOS, PTGS2, FGF2, MMP9, NFKB1, VEGFA
2-Fluoroadenosine Boss	0.001	22.28	597.1	SMAD3, IFNG, CASP3, IL1B, STAT3, BCL2, MITF, ATM, TNF, CFTR, IL2
Platinum Boss	0.001	22.27	1448.82	PTEN, BRCA1, TNF, EGFR, PRDX2, MYC, CASP3, ERBB2, KDR, HMOX1, HRAS, MAPK3, JAG1, MMP2, STAT3, MMP9, NFKB1, IL2, MTOR, VEGFA, IL6, MSH2, CDK4, BCL2, BAX, ATM, PPARG
L-Arabinose BOSS	0.001	22.22	283.81	PRDX2, IL6, CASP3, TNF, IL2
Omeprazole CTD 00006436	0.001	22.15	489.04	PARP1, IFNG, CASP3, EP300, HMOX1, PPARG, PRL, MAPK14, TNF
Ng-25 Mrc	0.001	22.07	229.4	MAPK11, MAPK8, MAPK14, MAPK12
Prochlorperazine PC3 UP	0.001	22.07	229.4	CDKN1A, DUSP1, HMOX1, PTGS2
Pemetrexed Disodium BOSS	0.001	22.07	229.4	ALK, HRAS, EGFR, VEGFA
Phenazopyridine Hydrochloride BOSS	0.001	22.07	229.4	IL6, PPARG, TNF, CFTR
Diazoxide BOSS	0.001	22.07	229.4	CASP3, BCL2, MTOR, MAPK3
Dichlorvos CTD 00004426	0.001	22.07	229.4	RB1, CCND1, CASP3, PPARG
Cgp 60474 Ttd 00002787	0.001	22.07	229.4	SMAD3, IL1B, TNF, CFTR
Sorafenib Tosylate BOSS	0.001	22	1157.69	ALK, STAT3, PTEN, MAPK14, TNF, MMP9, EGFR, IL2, MTOR, VEGFA, PRDX2, IL6, MYC, IL1B, CASP3, ERBB2, KDR, BCL2, PPARG, HRAS, CFTR, MAPK3
Ethidium BOSS	0.001	21.96	381.17	PRDX2, CDK4, CASP3, BCL2, HMOX1, TNF, MAPK3
1-Butanol BOSS	0.001	21.96	381.17	PRDX2, IL6, CASP3, BCL2, TNF, MTOR, MAPK3
Losartan BOSS	0.001	21.96	738.71	SMAD2, ACE, MMP2, STAT3, TNF, MMP9, EGFR, VEGFA, PRDX2, IL6, CASP3, BCL2, PPARG, MAPK3
5-Fluorouracil Boss	0.001	21.93	1417.32	PTEN, BRCA1, TNF, EGFR, PRDX2, PLAU, MYC, CASP3, ERBB2, KDR, HRAS, MAPK3, JAG1, MMP2, STAT3, MMP9, NFKB1, IL2, MTOR, VEGFA, IL6, MSH2, IFNG, BCL2, BAX, ATM, PPARG
Guanosine BOSS	0.001	21.92	532.48	PRDX2, IL6, CASP3, BCL2, HMOX1, TNF, HRAS, MTOR, MAPK3, VEGFA
Unii-768n7qo4kh Boss	0.001	21.89	684.41	MMP2, TNF, MMP9, EGFR, IL2, VEGFA, IL6, CASP3, IL1B, BCL2, BAX, PPARG, MAPK3
Azd-1152hqpa Kinome Scan	0.001	21.82	174.48	RET, KDR, EGFR
Sodium Azide CTD 00007311	0.001	21.82	174.48	CDKN1A, IFNG, NOS3
Triamcinolone CTD 00006921	0.001	21.82	174.48	NFKB1, CFTR, VEGFA
Aluminium Sulfate CTD 00001900	0.001	21.82	174.48	IL1B, PTGS2, NFKB1
Quinomycin A CTD 00005885	0.001	21.82	174.48	IL1B, CFTR, VEGFA
Griseofulvin CTD 00006055	0.001	21.82	174.48	CASP3, PPARG, TNF
Paraquat Ctd 00006471	0.001	21.78	1510.22	CEBPB, CDKN1A, BRCA1, PTGS2, TNF, PRDX2, MAPK8, CASP10, CASP3, CASP1, HMOX1, MAPK1, HRAS, MAPK3, JUN, TGFB1, PARP1, NOS2, DUSP1, MMP9, NFKB1, MTOR, VEGFA, DDB2, IL6, BCL2, FAS, BAX, ATM
3-Methyladenine BOSS	0.001	21.69	424.68	IL6, CASP3, STAT3, BCL2, HMOX1, TNF, MTOR, MAPK3
Tetracycline BOSS	0.001	21.67	674.24	MMP2, TNF, MMP9, EGFR, ESR2, VEGFA, PRDX2, IL6, PLAU, MYC, CASP3, BCL2, MAPK3
Luteolin BOSS	0.001	21.67	674.24	STAT3, TNF, MMP9, NFKB1, MTOR, VEGFA, IL6, CASP3, BCL2, HMOX1, PPARG, CFTR, MAPK3
Zafirlukast	0.001	21.62	273.11	MAPK1, PPARG, MAPK14, EGFR, MAPK3
Helenalin Ttd 00008402	0.001	21.62	273.11	SMAD3, IL1B, MITF, TNF, CFTR
Hexachlorophene	0.001	21.62	772.78	SMAD3, STAT3, MITF, BRCA1, PTGS2, MAPK14, NFKB1, ESR2, EGFR, ERBB2, CASP1, MAPK1, PPARG, CFTR, MAPK3
Isoflurane BOSS	0.001	21.54	370.84	IL6, CASP3, BCL2, HMOX1, TNF, MAPK3, VEGFA
Creatine BOSS	0.001	21.49	468.42	IL6, ACE, CASP3, MMP2, BCL2, HMOX1, PPARG, TNF, MAPK3
Ionomycin CTD 00007090	0.001	21.43	762.91	JUN, TGFB1, TRAF1, FOS, TNF, IL2, IL6, IFNG, MYC, CASP3, IL1B, AKT1, MAPK1, KRAS, MAPK3
Fenofibrate CTD 00006620	0.001	21.33	610.32	JUN, IL6, TGFB1, SMAD3, CCND1, NOS3, CASP3, BCL2, PPARG, TNF, MMP9, NFKB1
Lithium Chloride Boss	0.001	21.33	316.98	IL6, MYC, CASP3, BCL2, HMOX1, MAPK3
2,2',3,4,4',5,5'-Heptachlorobiphenyl Ctd 00003812	0.001	21.33	316.98	EP300, MAPK1, BRCA1, FOS, MMP9, MAPK3
Mepacrine MCF7 UP	0.001	21.33	218.8	CDKN1A, NOTCH1, JAG1, FAS
Primaquine HL60 UP	0.001	21.33	218.8	JUN, DUSP1, IL1B, PTGS2
Escitalopram Oxalate BOSS	0.001	21.33	218.8	IL6, PRL, TNF, MAPK3
Metrifonate CTD 00006928	0.001	21.33	118.56	CASP3, BCL2
Paraoxon-Methyl CTD 00000411	0.001	21.33	118.56	CDKN1A, PPARG
Methacholine Chloride CTD 00007107	0.001	21.33	118.56	IL1B, CFTR
Pcb 118 Ctd 00002737	0.001	21.33	118.56	MAPK1, MAPK3
7614-21-3 Ctd 00000893	0.001	21.33	118.56	TNF, RHOA
Ciprofibrate CTD 00000977	0.001	21.33	118.56	JUN, PPARG
Sildenafil CTD 00003367	0.001	21.33	118.56	CASP3, CFTR
Quinacrine CTD 00006680	0.001	21.33	118.56	BAX, MTOR
Tetrachlorodian CTD 00001882	0.001	21.33	118.56	PPARG, ESR2
Carnosic Acid CTD 00000939	0.001	21.33	118.56	PTEN, PPARG
Rocaglamide TTD 00010671	0.001	21.33	118.56	MITF, CFTR
Lithocholic Acid Ttd 00009001	0.001	21.33	118.56	ERBB2, MAPK1
Cp-55940 Ttd 00007306	0.001	21.33	118.56	SMAD3, IL1B
Celecoxib TTD 00002754	0.001	21.33	118.56	STAT3, PTGS2
Cube Root Extract CTD 00006707	0.001	21.23	1404.26	CDKN1A, BRCA1, TNF, MAPK8, CCND1, CASP3, HMOX1, MAPK1, MAPK3, JUN, PARP1, NOS3, MMP2, STAT3, FANCC, FOS, MAPK14, NFKB1, MTOR, VEGFA, IL6, IFNG, SNAI1, BCL2, FAS, BAX, ATM, PPARG
Prednisolone BOSS	0.001	21.22	654.63	ACE, MMP2, IL13, TNF, MMP9, IL2, MTOR, VEGFA, IL6, IFNG, IL1B, BCL2, CFTR
Phenol BOSS	0.001	21.2	556.47	IL6, ACE, IFNG, CASP3, MMP2, BCL2, TNF, MMP9, MTOR, ESR2, MAPK3
Kaempferol BOSS	0.001	21.18	458.64	IL6, CASP3, BCL2, HMOX1, PPARG, TNF, MMP9, NFKB1, MTOR
Dasatinib BOSS	0.001	21.13	699.12	SMAD3, STAT3, PTEN, TNF, EGFR, MTOR, VEGFA, IL6, CASP3, ERBB2, KDR, BCL2, PPARG, MAPK3
Dl-Valine Boss	0.001	21.13	360.95	PRDX2, IL6, ERBB2, TNF, HRAS, EGFR, MTOR
(+)-MK-801 Hydrogen Maleate BOSS	0.001	21.13	360.95	PRDX2, IL6, CASP3, MMP2, TNF, MMP9, MAPK3
Helenalin Ctd 00000035	0.001	21.13	360.95	IL6, SMAD3, CASP3, IL1B, MITF, TNF, CFTR
Lithium Boss	0.001	21.1	600.74	PRDX2, IL6, ACE, NOS3, CASP3, PTEN, BCL2, PRL, TNF, MMP9, IL2, VEGFA
2-Naphthoxyacetic Acid BOSS	0.001	21.05	263.06	PLAU, CDK4, MYC, CASP3, BCL2
362-05-0 Ctd 00000041	0.001	21.05	263.06	CCND1, MYC, PTGS2, ESR2, CFTR
Nevirapine CTD 00007321	0.001	21.05	263.06	IL6, IFNG, PPARG, EGFR, VEGFA
Rapamycin BOSS	0.001	21.01	1282.6	PTEN, TNF, EGFR, PRDX2, PLAU, MYC, CASP3, ERBB2, KDR, HMOX1, HRAS, MAPK3, ACE, MMP2, IL13, STAT3, MMP9, NFKB1, IL2, MTOR, VEGFA, IL6, IFNG, BCL2, ATM, PPARG
Aluminum Boss	0.001	20.98	405.02	PRDX2, IL6, IFNG, CASP3, IL13, BCL2, TNF, IL2
Mptp Boss	0.001	20.98	405.02	IL6, PLAU, CASP3, BCL2, HMOX1, PPARG, TNF, MAPK3
Velcade(Bortezomib) Boss	0.001	20.98	1180.61	MMP2, STAT3, PTEN, TNF, EGFR, NFKB1, IL2, MTOR, VEGFA, PRDX2, IL6, CCND1, PLAU, CDK4, MYC, CASP3, KDR, BCL2, BAX, HMOX1, ATM, PPARG, HRAS, MAPK3
N-Acetyl-L-Cysteine BOSS	0.001	20.94	1226.87	TNF, EGFR, PRDX2, MAPK8, PLAU, MYC, CASP3, KDR, CASP1, HMOX1, MAPK3, ACE, MMP2, STAT3, MAPK14, MMP9, NFKB1, IL2, MTOR, VEGFA, IL6, IFNG, BCL2, ATM, PPARG
4-Nonylphenol CTD 00001904	0.001	20.87	449.18	SMAD3, IFNG, IL1B, ERBB2, BCL2, BAX, FOS, TNF, ESR2
Idose BOSS	0.001	20.87	307.28	PRDX2, IL6, ACE, PPARG, PRL, TNF
2-Deoxy-D-Glucose BOSS	0.001	20.87	307.28	IL6, PLAU, CASP3, BCL2, TNF, MTOR
Indirubin Deriv. 7a Ctd 00004285	0.001	20.87	307.28	IL6, CCND1, MAPK1, CTNNB1, TNF, MTOR
Amg-706 Kinome Scan	0.001	20.87	164.07	RET, KDR, EGFR
Alvespimycin MCF7 DOWN	0.001	20.87	164.07	SCO2, MYC, HES1
Sapropterin BOSS	0.001	20.87	164.07	IL6, ACE, NOS3
Cladribine BOSS	0.001	20.87	164.07	IFNB1, CASP3, BCL2
Alloxan BOSS	0.001	20.87	164.07	IL6, BCL2, TNF
Magnesium Sulfate Boss	0.001	20.87	164.07	IL6, TNF, VEGFA
Pravastatin CTD 00007142	0.001	20.87	164.07	CDKN1A, PPARG, MTOR
Phenanthrene Ctd 00001483	0.001	20.87	164.07	PARP1, TNF, ESR2
4-Aminophenol CTD 00001254	0.001	20.87	164.07	SMAD3, AKT1, PPARG
Butyl 4-Hydroxybenzoate CTD 00001781	0.001	20.87	164.07	CCND1, PPARG, ESR2
Nortriptyline CTD 00006426	0.001	20.87	164.07	IL6, CASP3, TNF
Gr-127935 Ttd 00008296	0.001	20.87	164.07	SMAD3, MAPK1, MTOR
Myricetin CTD 00001847	0.001	20.8	635.93	CDKN1A, PARP1, PTGS2, TNF, MMP9, IL6, PIK3CA, MYC, CASP3, BCL2, HMOX1, BAX, CTNNB1
Daunorubicin BOSS	0.001	20.74	680.6	ACE, MMP2, PTEN, BRCA1, EGFR, VEGFA, PRDX2, IL6, CASP3, ERBB2, BCL2, ATM, PPARG, MAPK3
P-Phenylenediamine CTD 00001400	0.001	20.74	351.5	CDKN1A, DUSP1, HMOX1, PPARG, PTGS2, TNF, VEGFA
Dl-Thioctic Acid CTD 00006215	0.001	20.74	351.5	CCND1, MYC, STAT3, BCL2, HMOX1, BAX, NFKB1
Dl-Methamphetamine Boss	0.001	20.65	395.74	IL6, PLAU, CASP3, BCL2, HMOX1, TNF, MMP9, MAPK3
Nifuroxazide MCF7 UP	0.001	20.65	208.99	JUN, DUSP1, HMOX1, VEGFA
Gnf-Pf-78 Ttd 00008278	0.001	20.65	208.99	SMAD3, IL1B, STAT3, TNF
Aizen Uranine BOSS	0.001	20.62	1199.62	BRCA1, TNF, EGFR, PRDX2, MYC, CASP3, KDR, CASP1, HRAS, MAPK3, ACE, IFNB1, MMP2, MMP9, IL2, MTOR, VEGFA, IL6, MSH2, IFNG, IL1B, BCL2, CTNNB1, ATM, PPARG
Dutp BOSS	0.001	20.56	1098.17	CASR, MMP2, STAT3, PTEN, TNF, MMP9, EGFR, NFKB1, MTOR, VEGFA, IL6, MAPK8, IFNG, PLAU, CDK4, IL1B, CASP3, KDR, BCL2, BAX, HMOX1, PPARG, MAPK3
Sertraline CTD 00007358	0.001	20.55	671.64	JUN, DUSP1, STAT3, FOS, PTGS2, TNF, NFKB1, EGFR, MYC, CASP3, BCL2, PECAM1, MAPK1, MAPK3
Barasertib LINCS	0.001	20.51	253.6	RET, PIK3CA, ERBB2, KDR, EGFR
Suramin BOSS	0.001	20.51	253.6	PRDX2, IL6, CASP3, EGFR, MAPK3
Tetradioxin BOSS	0.001	20.51	253.6	IL6, CASP3, HMOX1, TNF, MAPK3
C2-Ceramide CTD 00002618	0.001	20.51	253.6	CASP3, KDR, BCL2, AKT1, CFTR
Ammonium Hexachloroplatinate(IV) CTD 00000945	0.001	20.51	253.6	MYC, HMOX1, PTGS2, TNF, NFKB1
[truncated: 1,421 more rows]
